# Supplementary material for: Evaluating the Potential of Younger Cases and Older Controls Cohorts to Improve Discovery Power in Genome-Wide Association Studies of Late-Onset Diseases
Source: MDPI journal article supplement (doi:10.3390/jpm9030038), 2019-07-22
Supplement: s2 [file s2]

Archive with 430 entries (379 files):
- SuppFiles/
- SuppFiles/ClinicalData/
- SuppFiles/ClinicalData/boehme2015prevalence.T2D.data
- SuppFiles/ClinicalData/brookmeyer1998projections.Alzheimers.data
- SuppFiles/ClinicalData/brookmeyer1998projections.AlzheimersForIncResults.data
- SuppFiles/ClinicalData/CancerResearchUK.BreastCancer.data
- SuppFiles/ClinicalData/CancerResearchUK.ColorectalCancer.data
- SuppFiles/ClinicalData/CancerResearchUK.LungCancerMen.data
- SuppFiles/ClinicalData/CancerResearchUK.PancreasCancer.data
- SuppFiles/ClinicalData/CancerResearchUK.PancreaticCancer.data
- SuppFiles/ClinicalData/CancerResearchUK.ProstateCancer.data
- SuppFiles/ClinicalData/Empty.data
- SuppFiles/ClinicalData/HipOsteoarthritis.data
- SuppFiles/ClinicalData/rothwell2005population.AllCerebralEvents.data
- SuppFiles/ClinicalData/rothwell2005population.AllCoronaryEvents.data
- SuppFiles/Executable/
- SuppFiles/Executable/CommonLow.txt
- SuppFiles/Executable/Heritability.exe
- SuppFiles/Executable/HeritabilityApproxParameters/
- SuppFiles/Executable/HeritabilityApproxParameters/Alzheimers.txt
- SuppFiles/Executable/HeritabilityApproxParameters/BreastCancer.txt
- SuppFiles/Executable/HeritabilityApproxParameters/CAD.txt
- SuppFiles/Executable/HeritabilityApproxParameters/ColorectalCancer.txt
- SuppFiles/Executable/HeritabilityApproxParameters/Exponential.txt
- SuppFiles/Executable/HeritabilityApproxParameters/HipOsteoarthritis.txt
- SuppFiles/Executable/HeritabilityApproxParameters/LungCancer.txt
- SuppFiles/Executable/HeritabilityApproxParameters/PancreaticCancer.txt
- SuppFiles/Executable/HeritabilityApproxParameters/ProstateCancer.txt
- SuppFiles/Executable/HeritabilityApproxParameters/Stroke.txt
- SuppFiles/Executable/HeritabilityApproxParameters/T2D.txt
- SuppFiles/Executable/HeritabilityModelConfig.txt
- SuppFiles/Executable/HeritabilityModelConfigDEBUG.txt
- SuppFiles/Executable/ModestLow.txt
- SuppFiles/Executable/Parameters.txt
- SuppFiles/Executable/RareHigh.txt
- SuppFiles/Executable/RareLow.txt
- SuppFiles/Executable/RareMedium.txt
- SuppFiles/Executable/SSDeathRateTable.csv
- SuppFiles/Executable/StillAliveTable.csv
- SuppFiles/GWAS association and age bias adjustment/
- SuppFiles/GWAS association and age bias adjustment/GwasSimulationPipeline.txt
- SuppFiles/GWAS association and age bias adjustment/Linux Head Tail bash scripts/
- SuppFiles/GWAS association and age bias adjustment/Linux Head Tail bash scripts/CombFiles.txt
- SuppFiles/GWAS association and age bias adjustment/Linux Head Tail bash scripts/README.txt
- SuppFiles/GWAS association and age bias adjustment/Linux Head Tail bash scripts/RunCombFiles.txt
- SuppFiles/GWAS association and age bias adjustment/Linux Head Tail bash scripts/RunCombFilesAll.txt
- SuppFiles/GWAS association and age bias adjustment/Results/
- SuppFiles/GWAS association and age bias adjustment/Results/LODsCommonLow/
- SuppFiles/GWAS association and age bias adjustment/Results/LODsCommonLow/Alzheimers/
- SuppFiles/GWAS association and age bias adjustment/Results/LODsCommonLow/Alzheimers/AdjustForAge_or105.csv
- SuppFiles/GWAS association and age bias adjustment/Results/LODsCommonLow/Alzheimers/AdjustForAge_or115.csv
- SuppFiles/GWAS association and age bias adjustment/Results/LODsCommonLow/Alzheimers/CohortHeritabilityAnalysis.csv
- SuppFiles/GWAS association and age bias adjustment/Results/LODsCommonLow/Alzheimers/CohortStatisticalPower.csv
- SuppFiles/GWAS association and age bias adjustment/Results/LODsCommonLow/Alzheimers/Regression2AdjustForAge_or105.csv
- SuppFiles/GWAS association and age bias adjustment/Results/LODsCommonLow/Alzheimers/Regression2AdjustForAge_or115.csv
- SuppFiles/GWAS association and age bias adjustment/Results/LODsCommonLow/Alzheimers/RegressionAdjustForAge_or105.csv
- SuppFiles/GWAS association and age bias adjustment/Results/LODsCommonLow/Alzheimers/RegressionAdjustForAge_or115.csv
- SuppFiles/GWAS association and age bias adjustment/Results/LODsCommonLow/Alzheimers/Yage.txt
- SuppFiles/GWAS association and age bias adjustment/Results/LODsCommonLow/BreastCancer/
- SuppFiles/GWAS association and age bias adjustment/Results/LODsCommonLow/BreastCancer/AdjustForAge_or105.csv
- SuppFiles/GWAS association and age bias adjustment/Results/LODsCommonLow/BreastCancer/AdjustForAge_or115.csv
- SuppFiles/GWAS association and age bias adjustment/Results/LODsCommonLow/BreastCancer/CohortHeritabilityAnalysis.csv
- SuppFiles/GWAS association and age bias adjustment/Results/LODsCommonLow/BreastCancer/CohortStatisticalPower.csv
- SuppFiles/GWAS association and age bias adjustment/Results/LODsCommonLow/BreastCancer/Regression2AdjustForAge_or105.csv
- SuppFiles/GWAS association and age bias adjustment/Results/LODsCommonLow/BreastCancer/Regression2AdjustForAge_or115.csv
- SuppFiles/GWAS association and age bias adjustment/Results/LODsCommonLow/BreastCancer/RegressionAdjustForAge_or105.csv
- SuppFiles/GWAS association and age bias adjustment/Results/LODsCommonLow/BreastCancer/RegressionAdjustForAge_or115.csv
- SuppFiles/GWAS association and age bias adjustment/Results/LODsCommonLow/BreastCancer/Yage.txt
- SuppFiles/GWAS association and age bias adjustment/Results/LODsCommonLow/CAD/
- SuppFiles/GWAS association and age bias adjustment/Results/LODsCommonLow/CAD/AdjustForAge_or105.csv
- SuppFiles/GWAS association and age bias adjustment/Results/LODsCommonLow/CAD/AdjustForAge_or115.csv
- SuppFiles/GWAS association and age bias adjustment/Results/LODsCommonLow/CAD/CohortHeritabilityAnalysis.csv
- SuppFiles/GWAS association and age bias adjustment/Results/LODsCommonLow/CAD/CohortStatisticalPower.csv
- SuppFiles/GWAS association and age bias adjustment/Results/LODsCommonLow/CAD/Regression2AdjustForAge_or105.csv
- SuppFiles/GWAS association and age bias adjustment/Results/LODsCommonLow/CAD/Regression2AdjustForAge_or115.csv
- SuppFiles/GWAS association and age bias adjustment/Results/LODsCommonLow/CAD/RegressionAdjustForAge_or105.csv
- SuppFiles/GWAS association and age bias adjustment/Results/LODsCommonLow/CAD/RegressionAdjustForAge_or115.csv
- SuppFiles/GWAS association and age bias adjustment/Results/LODsCommonLow/CAD/Yage.txt
- SuppFiles/GWAS association and age bias adjustment/Results/LODsCommonLow/ColorectalCancer/
- SuppFiles/GWAS association and age bias adjustment/Results/LODsCommonLow/ColorectalCancer/AdjustForAge_or105.csv
- SuppFiles/GWAS association and age bias adjustment/Results/LODsCommonLow/ColorectalCancer/AdjustForAge_or115.csv
- SuppFiles/GWAS association and age bias adjustment/Results/LODsCommonLow/ColorectalCancer/CohortHeritabilityAnalysis.csv
- SuppFiles/GWAS association and age bias adjustment/Results/LODsCommonLow/ColorectalCancer/CohortStatisticalPower.csv
- SuppFiles/GWAS association and age bias adjustment/Results/LODsCommonLow/ColorectalCancer/Regression2AdjustForAge_or105.csv
- SuppFiles/GWAS association and age bias adjustment/Results/LODsCommonLow/ColorectalCancer/Regression2AdjustForAge_or115.csv
- SuppFiles/GWAS association and age bias adjustment/Results/LODsCommonLow/ColorectalCancer/RegressionAdjustForAge_or105.csv
- SuppFiles/GWAS association and age bias adjustment/Results/LODsCommonLow/ColorectalCancer/RegressionAdjustForAge_or115.csv
- SuppFiles/GWAS association and age bias adjustment/Results/LODsCommonLow/ColorectalCancer/Yage.txt
- SuppFiles/GWAS association and age bias adjustment/Results/LODsCommonLow/HeritabilityModelConfig.txt
- SuppFiles/GWAS association and age bias adjustment/Results/LODsCommonLow/LOG.txt
- SuppFiles/GWAS association and age bias adjustment/Results/LODsCommonLow/LungCancer/
- SuppFiles/GWAS association and age bias adjustment/Results/LODsCommonLow/LungCancer/AdjustForAge_or105.csv
- SuppFiles/GWAS association and age bias adjustment/Results/LODsCommonLow/LungCancer/AdjustForAge_or115.csv
- SuppFiles/GWAS association and age bias adjustment/Results/LODsCommonLow/LungCancer/CohortHeritabilityAnalysis.csv
- SuppFiles/GWAS association and age bias adjustment/Results/LODsCommonLow/LungCancer/CohortStatisticalPower.csv
- SuppFiles/GWAS association and age bias adjustment/Results/LODsCommonLow/LungCancer/Regression2AdjustForAge_or105.csv
- SuppFiles/GWAS association and age bias adjustment/Results/LODsCommonLow/LungCancer/Regression2AdjustForAge_or115.csv
- SuppFiles/GWAS association and age bias adjustment/Results/LODsCommonLow/LungCancer/RegressionAdjustForAge_or105.csv
- SuppFiles/GWAS association and age bias adjustment/Results/LODsCommonLow/LungCancer/RegressionAdjustForAge_or115.csv
- SuppFiles/GWAS association and age bias adjustment/Results/LODsCommonLow/LungCancer/Yage.txt
- SuppFiles/GWAS association and age bias adjustment/Results/LODsCommonLow/Parameters.txt
- SuppFiles/GWAS association and age bias adjustment/Results/LODsCommonLow/ProstateCancer/
- SuppFiles/GWAS association and age bias adjustment/Results/LODsCommonLow/ProstateCancer/AdjustForAge_or105.csv
- SuppFiles/GWAS association and age bias adjustment/Results/LODsCommonLow/ProstateCancer/AdjustForAge_or115.csv
- SuppFiles/GWAS association and age bias adjustment/Results/LODsCommonLow/ProstateCancer/CohortHeritabilityAnalysis.csv
- SuppFiles/GWAS association and age bias adjustment/Results/LODsCommonLow/ProstateCancer/CohortStatisticalPower.csv
- SuppFiles/GWAS association and age bias adjustment/Results/LODsCommonLow/ProstateCancer/Regression2AdjustForAge_or105.csv
- SuppFiles/GWAS association and age bias adjustment/Results/LODsCommonLow/ProstateCancer/Regression2AdjustForAge_or115.csv
- SuppFiles/GWAS association and age bias adjustment/Results/LODsCommonLow/ProstateCancer/RegressionAdjustForAge_or105.csv
- SuppFiles/GWAS association and age bias adjustment/Results/LODsCommonLow/ProstateCancer/RegressionAdjustForAge_or115.csv
- SuppFiles/GWAS association and age bias adjustment/Results/LODsCommonLow/ProstateCancer/Yage.txt
- SuppFiles/GWAS association and age bias adjustment/Results/LODsCommonLow/Stroke/
- SuppFiles/GWAS association and age bias adjustment/Results/LODsCommonLow/Stroke/AdjustForAge_or105.csv
- SuppFiles/GWAS association and age bias adjustment/Results/LODsCommonLow/Stroke/AdjustForAge_or115.csv
- SuppFiles/GWAS association and age bias adjustment/Results/LODsCommonLow/Stroke/CohortHeritabilityAnalysis.csv
- SuppFiles/GWAS association and age bias adjustment/Results/LODsCommonLow/Stroke/CohortStatisticalPower.csv
- SuppFiles/GWAS association and age bias adjustment/Results/LODsCommonLow/Stroke/Regression2AdjustForAge_or105.csv
- SuppFiles/GWAS association and age bias adjustment/Results/LODsCommonLow/Stroke/Regression2AdjustForAge_or115.csv
- SuppFiles/GWAS association and age bias adjustment/Results/LODsCommonLow/Stroke/RegressionAdjustForAge_or105.csv
- SuppFiles/GWAS association and age bias adjustment/Results/LODsCommonLow/Stroke/RegressionAdjustForAge_or115.csv
- SuppFiles/GWAS association and age bias adjustment/Results/LODsCommonLow/Stroke/Yage.txt
- SuppFiles/GWAS association and age bias adjustment/Results/LODsCommonLow/T2D/
- SuppFiles/GWAS association and age bias adjustment/Results/LODsCommonLow/T2D/AdjustForAge_or105.csv
- SuppFiles/GWAS association and age bias adjustment/Results/LODsCommonLow/T2D/AdjustForAge_or115.csv
- SuppFiles/GWAS association and age bias adjustment/Results/LODsCommonLow/T2D/CohortHeritabilityAnalysis.csv
- SuppFiles/GWAS association and age bias adjustment/Results/LODsCommonLow/T2D/CohortStatisticalPower.csv
- SuppFiles/GWAS association and age bias adjustment/Results/LODsCommonLow/T2D/Regression2AdjustForAge_or105.csv
- SuppFiles/GWAS association and age bias adjustment/Results/LODsCommonLow/T2D/Regression2AdjustForAge_or115.csv
- SuppFiles/GWAS association and age bias adjustment/Results/LODsCommonLow/T2D/RegressionAdjustForAge_or105.csv
- SuppFiles/GWAS association and age bias adjustment/Results/LODsCommonLow/T2D/RegressionAdjustForAge_or115.csv
- SuppFiles/GWAS association and age bias adjustment/Results/LODsCommonLow/T2D/Yage.txt
- SuppFiles/GWAS association and age bias adjustment/Windows batches and R scripts/
- SuppFiles/GWAS association and age bias adjustment/Windows batches and R scripts/AdjustByAge.R
- SuppFiles/GWAS association and age bias adjustment/Windows batches and R scripts/AdjustForAge.bat
- SuppFiles/GWAS association and age bias adjustment/Windows batches and R scripts/AppentTPed.exe
- SuppFiles/GWAS association and age bias adjustment/Windows batches and R scripts/FindAdjustmentRegressionFunction.R
- SuppFiles/GWAS association and age bias adjustment/Windows batches and R scripts/MakeBed.bat
- SuppFiles/GWAS association and age bias adjustment/Windows batches and R scripts/MakePlinkCSV.exe
- SuppFiles/GWAS association and age bias adjustment/Windows batches and R scripts/RegressionAdjustForAge.bat
- SuppFiles/GWAS association and age bias adjustment/Windows batches and R scripts/RemoveCR.exe
- SuppFiles/GWAS association and age bias adjustment/Windows batches and R scripts/RunMakeBed.bat
- SuppFiles/GWAS association and age bias adjustment/Windows batches and R scripts/RunMakeBedAll.bat
- SuppFiles/Notes.txt
- SuppFiles/Results/
- SuppFiles/Results/AlzheimersTwoSDFraction.csv
- SuppFiles/Results/LODsCommonLow/
- SuppFiles/Results/LODsCommonLow/Alzheimers/
- SuppFiles/Results/LODsCommonLow/Alzheimers/CasesMultipleSameAgeCohortStatisticalPower.csv
- SuppFiles/Results/LODsCommonLow/Alzheimers/CasesMultipleYoungOldCohortStatisticalPower.csv
- SuppFiles/Results/LODsCommonLow/Alzheimers/CasesNeededCohortStatisticalPower.csv
- SuppFiles/Results/LODsCommonLow/Alzheimers/CasesNeededStatisticalPower.csv
- SuppFiles/Results/LODsCommonLow/Alzheimers/CasesNeededYoungOldCohortStatisticalPower.csv
- SuppFiles/Results/LODsCommonLow/Alzheimers/CohortHeritabilityAnalysis.csv
- SuppFiles/Results/LODsCommonLow/Alzheimers/CohortStatisticalPower.csv
- SuppFiles/Results/LODsCommonLow/Alzheimers/FrailtyAnalysis.csv
- SuppFiles/Results/LODsCommonLow/Alzheimers/HeritabilityAnalysis.csv
- SuppFiles/Results/LODsCommonLow/Alzheimers/StatisticalPower.csv
- SuppFiles/Results/LODsCommonLow/BreastCancer/
- SuppFiles/Results/LODsCommonLow/BreastCancer/CasesMultipleSameAgeCohortStatisticalPower.csv
- SuppFiles/Results/LODsCommonLow/BreastCancer/CasesMultipleYoungOldCohortStatisticalPower.csv
- SuppFiles/Results/LODsCommonLow/BreastCancer/CasesNeededCohortStatisticalPower.csv
- SuppFiles/Results/LODsCommonLow/BreastCancer/CasesNeededStatisticalPower.csv
- SuppFiles/Results/LODsCommonLow/BreastCancer/CasesNeededYoungOldCohortStatisticalPower.csv
- SuppFiles/Results/LODsCommonLow/BreastCancer/CohortHeritabilityAnalysis.csv
- SuppFiles/Results/LODsCommonLow/BreastCancer/CohortStatisticalPower.csv
- SuppFiles/Results/LODsCommonLow/BreastCancer/FrailtyAnalysis.csv
- SuppFiles/Results/LODsCommonLow/BreastCancer/HeritabilityAnalysis.csv
- SuppFiles/Results/LODsCommonLow/BreastCancer/StatisticalPower.csv
- SuppFiles/Results/LODsCommonLow/CAD/
- SuppFiles/Results/LODsCommonLow/CAD/CasesMultipleSameAgeCohortStatisticalPower.csv
- SuppFiles/Results/LODsCommonLow/CAD/CasesMultipleYoungOldCohortStatisticalPower.csv
- SuppFiles/Results/LODsCommonLow/CAD/CasesNeededCohortStatisticalPower.csv
- SuppFiles/Results/LODsCommonLow/CAD/CasesNeededStatisticalPower.csv
- SuppFiles/Results/LODsCommonLow/CAD/CasesNeededYoungOldCohortStatisticalPower.csv
- SuppFiles/Results/LODsCommonLow/CAD/CohortHeritabilityAnalysis.csv
- SuppFiles/Results/LODsCommonLow/CAD/CohortStatisticalPower.csv
- SuppFiles/Results/LODsCommonLow/CAD/FrailtyAnalysis.csv
- SuppFiles/Results/LODsCommonLow/CAD/HeritabilityAnalysis.csv
- SuppFiles/Results/LODsCommonLow/CAD/StatisticalPower.csv
- SuppFiles/Results/LODsCommonLow/ColorectalCancer/
- SuppFiles/Results/LODsCommonLow/ColorectalCancer/CasesMultipleSameAgeCohortStatisticalPower.csv
- SuppFiles/Results/LODsCommonLow/ColorectalCancer/CasesMultipleYoungOldCohortStatisticalPower.csv
- SuppFiles/Results/LODsCommonLow/ColorectalCancer/CasesNeededCohortStatisticalPower.csv
- SuppFiles/Results/LODsCommonLow/ColorectalCancer/CasesNeededStatisticalPower.csv
- SuppFiles/Results/LODsCommonLow/ColorectalCancer/CasesNeededYoungOldCohortStatisticalPower.csv
- SuppFiles/Results/LODsCommonLow/ColorectalCancer/CohortHeritabilityAnalysis.csv
- SuppFiles/Results/LODsCommonLow/ColorectalCancer/CohortStatisticalPower.csv
- SuppFiles/Results/LODsCommonLow/ColorectalCancer/FrailtyAnalysis.csv
- SuppFiles/Results/LODsCommonLow/ColorectalCancer/HeritabilityAnalysis.csv
- SuppFiles/Results/LODsCommonLow/ColorectalCancer/StatisticalPower.csv
- SuppFiles/Results/LODsCommonLow/HeritabilityModelConfig.txt
- SuppFiles/Results/LODsCommonLow/LOG.txt
- SuppFiles/Results/LODsCommonLow/LungCancer/
- SuppFiles/Results/LODsCommonLow/LungCancer/CasesMultipleSameAgeCohortStatisticalPower.csv
- SuppFiles/Results/LODsCommonLow/LungCancer/CasesMultipleYoungOldCohortStatisticalPower.csv
- SuppFiles/Results/LODsCommonLow/LungCancer/CasesNeededCohortStatisticalPower.csv
- SuppFiles/Results/LODsCommonLow/LungCancer/CasesNeededStatisticalPower.csv
- SuppFiles/Results/LODsCommonLow/LungCancer/CasesNeededYoungOldCohortStatisticalPower.csv
- SuppFiles/Results/LODsCommonLow/LungCancer/CohortHeritabilityAnalysis.csv
- SuppFiles/Results/LODsCommonLow/LungCancer/CohortStatisticalPower.csv
- SuppFiles/Results/LODsCommonLow/LungCancer/FrailtyAnalysis.csv
- SuppFiles/Results/LODsCommonLow/LungCancer/HeritabilityAnalysis.csv
- SuppFiles/Results/LODsCommonLow/LungCancer/StatisticalPower.csv
- SuppFiles/Results/LODsCommonLow/Parameters.txt
- SuppFiles/Results/LODsCommonLow/ProstateCancer/
- SuppFiles/Results/LODsCommonLow/ProstateCancer/CasesMultipleSameAgeCohortStatisticalPower.csv
- SuppFiles/Results/LODsCommonLow/ProstateCancer/CasesMultipleYoungOldCohortStatisticalPower.csv
- SuppFiles/Results/LODsCommonLow/ProstateCancer/CasesNeededCohortStatisticalPower.csv
- SuppFiles/Results/LODsCommonLow/ProstateCancer/CasesNeededStatisticalPower.csv
- SuppFiles/Results/LODsCommonLow/ProstateCancer/CasesNeededYoungOldCohortStatisticalPower.csv
- SuppFiles/Results/LODsCommonLow/ProstateCancer/CohortHeritabilityAnalysis.csv
- SuppFiles/Results/LODsCommonLow/ProstateCancer/CohortStatisticalPower.csv
- SuppFiles/Results/LODsCommonLow/ProstateCancer/FrailtyAnalysis.csv
- SuppFiles/Results/LODsCommonLow/ProstateCancer/HeritabilityAnalysis.csv
- SuppFiles/Results/LODsCommonLow/ProstateCancer/StatisticalPower.csv
- SuppFiles/Results/LODsCommonLow/ProstateCancerH42/
- SuppFiles/Results/LODsCommonLow/ProstateCancerH42/CasesMultipleSameAgeCohortStatisticalPower.csv
- SuppFiles/Results/LODsCommonLow/ProstateCancerH42/CasesMultipleYoungOldCohortStatisticalPower.csv
- SuppFiles/Results/LODsCommonLow/ProstateCancerH42/CasesNeededCohortStatisticalPower.csv
- SuppFiles/Results/LODsCommonLow/ProstateCancerH42/CasesNeededStatisticalPower.csv
- SuppFiles/Results/LODsCommonLow/ProstateCancerH42/CasesNeededYoungOldCohortStatisticalPower.csv
- SuppFiles/Results/LODsCommonLow/ProstateCancerH42/CohortHeritabilityAnalysis.csv
- SuppFiles/Results/LODsCommonLow/ProstateCancerH42/CohortStatisticalPower.csv
- SuppFiles/Results/LODsCommonLow/ProstateCancerH42/FrailtyAnalysis.csv
- SuppFiles/Results/LODsCommonLow/ProstateCancerH42/HeritabilityAnalysis.csv
- SuppFiles/Results/LODsCommonLow/ProstateCancerH42/HeritabilityModelConfig.txt
- SuppFiles/Results/LODsCommonLow/ProstateCancerH42/Parameters.txt
- SuppFiles/Results/LODsCommonLow/ProstateCancerH42/StatisticalPower.csv
- SuppFiles/Results/LODsCommonLow/Stroke/
- SuppFiles/Results/LODsCommonLow/Stroke/CasesMultipleSameAgeCohortStatisticalPower.csv
- SuppFiles/Results/LODsCommonLow/Stroke/CasesMultipleYoungOldCohortStatisticalPower.csv
- SuppFiles/Results/LODsCommonLow/Stroke/CasesNeededCohortStatisticalPower.csv
- SuppFiles/Results/LODsCommonLow/Stroke/CasesNeededStatisticalPower.csv
- SuppFiles/Results/LODsCommonLow/Stroke/CasesNeededYoungOldCohortStatisticalPower.csv
- SuppFiles/Results/LODsCommonLow/Stroke/CohortHeritabilityAnalysis.csv
- SuppFiles/Results/LODsCommonLow/Stroke/CohortStatisticalPower.csv
- SuppFiles/Results/LODsCommonLow/Stroke/FrailtyAnalysis.csv
- SuppFiles/Results/LODsCommonLow/Stroke/HeritabilityAnalysis.csv
- SuppFiles/Results/LODsCommonLow/Stroke/StatisticalPower.csv
- SuppFiles/Results/LODsCommonLow/T2D/
- SuppFiles/Results/LODsCommonLow/T2D/CasesMultipleSameAgeCohortStatisticalPower.csv
- SuppFiles/Results/LODsCommonLow/T2D/CasesMultipleYoungOldCohortStatisticalPower.csv
- SuppFiles/Results/LODsCommonLow/T2D/CasesNeededCohortStatisticalPower.csv
- SuppFiles/Results/LODsCommonLow/T2D/CasesNeededStatisticalPower.csv
- SuppFiles/Results/LODsCommonLow/T2D/CasesNeededYoungOldCohortStatisticalPower.csv
- SuppFiles/Results/LODsCommonLow/T2D/CohortHeritabilityAnalysis.csv
- SuppFiles/Results/LODsCommonLow/T2D/CohortStatisticalPower.csv
- SuppFiles/Results/LODsCommonLow/T2D/FrailtyAnalysis.csv
- SuppFiles/Results/LODsCommonLow/T2D/HeritabilityAnalysis.csv
- SuppFiles/Results/LODsCommonLow/T2D/StatisticalPower.csv
- SuppFiles/Results/LODsCommonLow/_ConfAnalysis/
- SuppFiles/Results/LODsCommonLow/_ConfAnalysis/HeritabilityModelConfig.txt
- SuppFiles/Results/LODsRareMedium/
- SuppFiles/Results/LODsRareMedium/Alzheimers/
- SuppFiles/Results/LODsRareMedium/Alzheimers/CasesMultipleSameAgeCohortStatisticalPower.csv
- SuppFiles/Results/LODsRareMedium/Alzheimers/CasesMultipleYoungOldCohortStatisticalPower.csv
- SuppFiles/Results/LODsRareMedium/Alzheimers/CasesNeededCohortStatisticalPower.csv
- SuppFiles/Results/LODsRareMedium/Alzheimers/CasesNeededStatisticalPower.csv
- SuppFiles/Results/LODsRareMedium/Alzheimers/CasesNeededYoungOldCohortStatisticalPower.csv
- SuppFiles/Results/LODsRareMedium/Alzheimers/CohortHeritabilityAnalysis.csv
- SuppFiles/Results/LODsRareMedium/Alzheimers/CohortStatisticalPower.csv
- SuppFiles/Results/LODsRareMedium/Alzheimers/FrailtyAnalysis.csv
- SuppFiles/Results/LODsRareMedium/Alzheimers/HeritabilityAnalysis.csv
- SuppFiles/Results/LODsRareMedium/Alzheimers/StatisticalPower.csv
- SuppFiles/Results/LODsRareMedium/BreastCancer/
- SuppFiles/Results/LODsRareMedium/BreastCancer/CasesMultipleSameAgeCohortStatisticalPower.csv
- SuppFiles/Results/LODsRareMedium/BreastCancer/CasesMultipleYoungOldCohortStatisticalPower.csv
- SuppFiles/Results/LODsRareMedium/BreastCancer/CasesNeededCohortStatisticalPower.csv
- SuppFiles/Results/LODsRareMedium/BreastCancer/CasesNeededStatisticalPower.csv
- SuppFiles/Results/LODsRareMedium/BreastCancer/CasesNeededYoungOldCohortStatisticalPower.csv
- SuppFiles/Results/LODsRareMedium/BreastCancer/CohortHeritabilityAnalysis.csv
- SuppFiles/Results/LODsRareMedium/BreastCancer/CohortStatisticalPower.csv
- SuppFiles/Results/LODsRareMedium/BreastCancer/FrailtyAnalysis.csv
- SuppFiles/Results/LODsRareMedium/BreastCancer/HeritabilityAnalysis.csv
- SuppFiles/Results/LODsRareMedium/BreastCancer/StatisticalPower.csv
- SuppFiles/Results/LODsRareMedium/CAD/
- SuppFiles/Results/LODsRareMedium/CAD/CasesMultipleSameAgeCohortStatisticalPower.csv
- SuppFiles/Results/LODsRareMedium/CAD/CasesMultipleYoungOldCohortStatisticalPower.csv
- SuppFiles/Results/LODsRareMedium/CAD/CasesNeededCohortStatisticalPower.csv
- SuppFiles/Results/LODsRareMedium/CAD/CasesNeededStatisticalPower.csv
- SuppFiles/Results/LODsRareMedium/CAD/CasesNeededYoungOldCohortStatisticalPower.csv
- SuppFiles/Results/LODsRareMedium/CAD/CohortHeritabilityAnalysis.csv
- SuppFiles/Results/LODsRareMedium/CAD/CohortStatisticalPower.csv
- SuppFiles/Results/LODsRareMedium/CAD/FrailtyAnalysis.csv
- SuppFiles/Results/LODsRareMedium/CAD/HeritabilityAnalysis.csv
- SuppFiles/Results/LODsRareMedium/CAD/StatisticalPower.csv
- SuppFiles/Results/LODsRareMedium/ColorectalCancer/
- SuppFiles/Results/LODsRareMedium/ColorectalCancer/CasesMultipleSameAgeCohortStatisticalPower.csv
- SuppFiles/Results/LODsRareMedium/ColorectalCancer/CasesMultipleYoungOldCohortStatisticalPower.csv
- SuppFiles/Results/LODsRareMedium/ColorectalCancer/CasesNeededCohortStatisticalPower.csv
- SuppFiles/Results/LODsRareMedium/ColorectalCancer/CasesNeededStatisticalPower.csv
- SuppFiles/Results/LODsRareMedium/ColorectalCancer/CasesNeededYoungOldCohortStatisticalPower.csv
- SuppFiles/Results/LODsRareMedium/ColorectalCancer/CohortHeritabilityAnalysis.csv
- SuppFiles/Results/LODsRareMedium/ColorectalCancer/CohortStatisticalPower.csv
- SuppFiles/Results/LODsRareMedium/ColorectalCancer/FrailtyAnalysis.csv
- SuppFiles/Results/LODsRareMedium/ColorectalCancer/HeritabilityAnalysis.csv
- SuppFiles/Results/LODsRareMedium/ColorectalCancer/StatisticalPower.csv
- SuppFiles/Results/LODsRareMedium/HeritabilityModelConfig.txt
- SuppFiles/Results/LODsRareMedium/LOG.txt
- SuppFiles/Results/LODsRareMedium/LungCancer/
[truncated: 130 more entries]
