# Supplementary material for: Evaluating the Potential of Younger Cases and Older Controls Cohorts to Improve Discovery Power in Genome-Wide Association Studies of Late-Onset Diseases
Source: MDPI journal article supplement (doi:10.3390/jpm9030038), 2019-07-22
Supplement: s2 [file s2 › SuppFiles/GWAS association and age bias adjustment/Linux Head Tail bash scripts/CombFiles.txt]

cd "$1"
{
if [ ! -f ./Case$2.ped ]; then
   exit 0
fi
}
let "plusOne = $3 + 1"
(head -n $3 Case$2.ped; head -n $3 Cntr$2.ped) > $2.ped
(head -n $plusOne Case$2.cov; tail -n +2 Cntr$2.cov | tail -n $3) > $2.cov
{
if [ "$2" == "Y" ]; then
#  (head -n $3 Case$2.ped; head -n $3 Cntr$2.ped) > $2.ped
#  (head -n $plusOne Case$2.cov; tail -n +2 Cntr$2.cov | tail -n $3) > $2.cov
   head -n 2 ./Y.cov > ../Yage.txt
   exit 0
fi
}
(head -n $3 CaseY.ped; head -n $3 Cntr$2.ped) > Y_$2.ped
(head -n $plusOne CaseY.cov; tail -n +2 Cntr$2.cov | tail -n $3) > Y_$2.cov
