# Supplementary material for: Evaluating the Potential of Younger Cases and Older Controls Cohorts to Improve Discovery Power in Genome-Wide Association Studies of Late-Onset Diseases
Source: MDPI journal article supplement (doi:10.3390/jpm9030038), 2019-07-22
Supplement: s2 [file s2 › SuppFiles/GWAS association and age bias adjustment/Linux Head Tail bash scripts/README.txt]

While PLINK and R is running on Windows in my case, using HEAD, CAT and TAIL from Linux for PED and COV files manipulation is unsurpassed in simplicity and ease of use, this is why I have this via Linux subsystem on Windows.
