# Supplementary material for: Evaluating the Potential of Younger Cases and Older Controls Cohorts to Improve Discovery Power in Genome-Wide Association Studies of Late-Onset Diseases
Source: MDPI journal article supplement (doi:10.3390/jpm9030038), 2019-07-22
Supplement: s2 [file s2 › SuppFiles/GWAS association and age bias adjustment/Linux Head Tail bash scripts/RunCombFiles.txt]

 ./CombFiles.txt "$1/plink" Y $2 &
 ./CombFiles.txt "$1/plink" 5 $2 & 
 ./CombFiles.txt "$1/plink" 30 $2 & 
 ./CombFiles.txt "$1/plink" 35 $2 & 
 ./CombFiles.txt "$1/plink" 40 $2 &
 ./CombFiles.txt "$1/plink" 45 $2 & 
 ./CombFiles.txt "$1/plink" 50 $2 &
 ./CombFiles.txt "$1/plink" 55 $2 & 
 ./CombFiles.txt "$1/plink" 60 $2 &
 ./CombFiles.txt "$1/plink" 65 $2 & 
 ./CombFiles.txt "$1/plink" 70 $2 &
 ./CombFiles.txt "$1/plink" 75 $2 & 
 ./CombFiles.txt "$1/plink" 80 $2 &
 ./CombFiles.txt "$1/plink" 85 $2 & 
 ./CombFiles.txt "$1/plink" 90 $2 &
 ./CombFiles.txt "$1/plink" 95 $2 & 
 ./CombFiles.txt "$1/plink" 100 $2
