# Supplementary material for: Evaluating the Potential of Younger Cases and Older Controls Cohorts to Improve Discovery Power in Genome-Wide Association Studies of Late-Onset Diseases
Source: MDPI journal article supplement (doi:10.3390/jpm9030038), 2019-07-22
Supplement: s2 [file s2 › SuppFiles/GWAS association and age bias adjustment/Linux Head Tail bash scripts/RunCombFilesAll.txt]

 ./RunCombFiles.txt "$1/Alzheimers" $2
 ./RunCombFiles.txt "$1/T2D" $2
 ./RunCombFiles.txt "$1/CAD" $2
 ./RunCombFiles.txt "$1/Stroke" $2
 ./RunCombFiles.txt "$1/BreastCancer" $2
 ./RunCombFiles.txt "$1/ProstateCancer" $2
 ./RunCombFiles.txt "$1/ColorectalCancer" $2
 ./RunCombFiles.txt "$1/LungCancer" $2
