# Supplementary material for: Evaluating the Potential of Younger Cases and Older Controls Cohorts to Improve Discovery Power in Genome-Wide Association Studies of Late-Onset Diseases
Source: MDPI journal article supplement (doi:10.3390/jpm9030038), 2019-07-22
Supplement: s2 [file s2 › SuppFiles/GWAS association and age bias adjustment/Results/LODsCommonLow/Alzheimers/RegressionAdjustForAge_or105.csv]

age	OR	beta	se	p	OR_adj	beta_adj	se_adj	p_adj	adj	beta_rel	OR_rel	beta_rel_norm	agePower	power	intercept	slope	ResidualStandardError	StandardDeviation	Pvalue	RegressionLine
5.9e+01	1.03682e+00	3.61573e-02	2.82868e-03	1.27970e-37	1.03682e+00	3.61573e-02	2.82868e-03	1.27970e-37	0.00000e+00	0.00000e+00	1.00000e+00	0.00000e+00	0.00000e+00	3.2e+00	3.84491e-03	2.82363e-06	6.74563e-03	4.53342e-08	4.90838e-12	3.84491e-03
6.0e+01	1.03665e+00	3.59919e-02	2.82894e-03	3.01208e-37	1.03682e+00	3.61596e-02	2.82897e-03	1.40521e-37	-1.85547e-02	0.00000e+00	9.99832e-01	0.00000e+00	1.00000e+00	3.2e+00	3.84491e-03	2.82363e-06	6.74563e-03	4.53342e-08	4.90838e-12	3.84773e-03
6.5e+01	1.03753e+00	3.68426e-02	2.82899e-03	4.97327e-39	1.03682e+00	3.61543e-02	2.82950e-03	1.23220e-37	7.61719e-02	6.88325e-04	1.00069e+00	1.90385e-02	3.09089e+02	3.2e+00	3.84491e-03	2.82363e-06	6.74563e-03	4.53342e-08	4.90838e-12	4.71766e-03
7.0e+01	1.03696e+00	3.62912e-02	2.82892e-03	6.23871e-38	1.03682e+00	3.61588e-02	2.82894e-03	1.14638e-37	1.46484e-02	1.32402e-04	1.00013e+00	3.66168e-03	2.15009e+03	3.2e+00	3.84491e-03	2.82363e-06	6.74563e-03	4.53342e-08	4.90838e-12	9.91597e-03
7.5e+01	1.03753e+00	3.68401e-02	2.82887e-03	5.47977e-39	1.03681e+00	3.61518e-02	2.82938e-03	1.35276e-37	7.61719e-02	6.88279e-04	1.00069e+00	1.90386e-02	7.13155e+03	3.2e+00	3.84491e-03	2.82363e-06	6.74563e-03	4.53342e-08	4.90838e-12	2.39818e-02
8.0e+01	1.03876e+00	3.80244e-02	2.82873e-03	2.13394e-41	1.03682e+00	3.61550e-02	2.83252e-03	1.69705e-37	2.07031e-01	1.86943e-03	1.00187e+00	5.17060e-02	1.70256e+04	3.2e+00	3.84491e-03	2.82363e-06	6.74563e-03	4.53342e-08	4.90838e-12	5.19189e-02
8.5e+01	1.04061e+00	3.98050e-02	2.82881e-03	3.34263e-45	1.03682e+00	3.61627e-02	2.84326e-03	3.00946e-37	4.04297e-01	3.64232e-03	1.00365e+00	1.00720e-01	3.37221e+04	3.2e+00	3.84491e-03	2.82363e-06	6.74563e-03	4.53342e-08	4.90838e-12	9.90638e-02
9.0e+01	1.04353e+00	4.26045e-02	2.82881e-03	1.77787e-51	1.03682e+00	3.61597e-02	2.87482e-03	1.97028e-36	7.20703e-01	6.44481e-03	1.00647e+00	1.78232e-01	5.92049e+04	3.2e+00	3.84491e-03	2.82363e-06	6.74563e-03	4.53342e-08	4.90838e-12	1.71018e-01
9.5e+01	1.04701e+00	4.59402e-02	2.82894e-03	1.71814e-59	1.03682e+00	3.61615e-02	2.93837e-03	6.49791e-35	1.10938e+00	9.77870e-03	1.00983e+00	2.70417e-01	9.55362e+04	3.2e+00	3.84491e-03	2.82363e-06	6.74563e-03	4.53342e-08	4.90838e-12	2.73604e-01
1.0e+02	1.05238e+00	5.10563e-02	2.82881e-03	5.03756e-73	1.03682e+00	3.61604e-02	3.10434e-03	1.92235e-31	1.75195e+00	1.48958e-02	1.01501e+00	4.11937e-01	1.44847e+05	3.2e+00	3.84491e-03	2.82363e-06	6.74563e-03	4.53342e-08	4.90838e-12	4.12839e-01
