# Supplementary material for: Evaluating the Potential of Younger Cases and Older Controls Cohorts to Improve Discovery Power in Genome-Wide Association Studies of Late-Onset Diseases
Source: MDPI journal article supplement (doi:10.3390/jpm9030038), 2019-07-22
Supplement: s2 [file s2 › SuppFiles/GWAS association and age bias adjustment/Results/LODsCommonLow/CAD/Regression2AdjustForAge_or115.csv]

age	OR	beta	se	p	OR_adj	beta_adj	se_adj	p_adj	adj	beta_rel	OR_rel	beta_rel_norm	agePower	power	intercept	slope	ResidualStandardError	StandardDeviation	Pvalue	RegressionLine
4.4e+01	1.14072e+00	1.31657e-01	3.09195e-03	0e+00	1.14072e+00	1.31657e-01	3.09195e-03	0e+00	0.00000e+00	0.00000e+00	1.00000e+00	0.00000e+00	0.000e+00	2e+00	-5.55841e-04	1.23165e-04	3.94837e-03	1.07116e-06	2.69321e-18	-5.55841e-04
4.5e+01	1.14073e+00	1.31671e-01	3.09180e-03	0e+00	1.14073e+00	1.31671e-01	3.09180e-03	0e+00	0.00000e+00	0.00000e+00	1.00000e+00	0.00000e+00	1.000e+00	2e+00	-5.55841e-04	1.23165e-04	3.94837e-03	1.07116e-06	2.69321e-18	-4.32676e-04
5.0e+01	1.14193e+00	1.32716e-01	3.09229e-03	0e+00	1.14075e+00	1.31689e-01	3.09238e-03	0e+00	3.12500e-02	1.02731e-03	1.00103e+00	7.80103e-03	3.600e+01	2e+00	-5.55841e-04	1.23165e-04	3.94837e-03	1.07116e-06	2.69321e-18	3.87809e-03
5.5e+01	1.14303e+00	1.33680e-01	3.09262e-03	0e+00	1.14068e+00	1.31627e-01	3.09299e-03	0e+00	6.25000e-02	2.05353e-03	1.00206e+00	1.56011e-02	1.210e+02	2e+00	-5.55841e-04	1.23165e-04	3.94837e-03	1.07116e-06	2.69321e-18	1.43471e-02
6.0e+01	1.14478e+00	1.35215e-01	3.09354e-03	0e+00	1.14068e+00	1.31622e-01	3.09469e-03	0e+00	1.09375e-01	3.59287e-03	1.00360e+00	2.72969e-02	2.560e+02	2e+00	-5.55841e-04	1.23165e-04	3.94837e-03	1.07116e-06	2.69321e-18	3.09744e-02
6.5e+01	1.14830e+00	1.38279e-01	3.09456e-03	0e+00	1.14066e+00	1.31611e-01	3.09852e-03	0e+00	2.03125e-01	6.66793e-03	1.00669e+00	5.06639e-02	4.410e+02	2e+00	-5.55841e-04	1.23165e-04	3.94837e-03	1.07116e-06	2.69321e-18	5.37599e-02
7.0e+01	1.15216e+00	1.41637e-01	3.09602e-03	0e+00	1.14070e+00	1.31643e-01	3.10494e-03	0e+00	3.04688e-01	9.99357e-03	1.01004e+00	7.59142e-02	6.760e+02	2e+00	-5.55841e-04	1.23165e-04	3.94837e-03	1.07116e-06	2.69321e-18	8.27036e-02
7.5e+01	1.15874e+00	1.47336e-01	3.09817e-03	0e+00	1.14081e+00	1.31737e-01	3.12000e-03	0e+00	4.76562e-01	1.55988e-02	1.01572e+00	1.18409e-01	9.610e+02	2e+00	-5.55841e-04	1.23165e-04	3.94837e-03	1.07116e-06	2.69321e-18	1.17806e-01
8.0e+01	1.16517e+00	1.52865e-01	3.10035e-03	0e+00	1.14080e+00	1.31727e-01	3.14084e-03	0e+00	6.48438e-01	2.11388e-02	1.02136e+00	1.60474e-01	1.296e+03	2e+00	-5.55841e-04	1.23165e-04	3.94837e-03	1.07116e-06	2.69321e-18	1.59066e-01
8.5e+01	1.17286e+00	1.59443e-01	3.10274e-03	0e+00	1.14068e+00	1.31629e-01	3.17402e-03	0e+00	8.59375e-01	2.78139e-02	1.02820e+00	2.11305e-01	1.681e+03	2e+00	-5.55841e-04	1.23165e-04	3.94837e-03	1.07116e-06	2.69321e-18	2.06484e-01
9.0e+01	1.18117e+00	1.66506e-01	3.10584e-03	0e+00	1.14072e+00	1.31662e-01	3.22005e-03	0e+00	1.08594e+00	3.48436e-02	1.03546e+00	2.64644e-01	2.116e+03	2e+00	-5.55841e-04	1.23165e-04	3.94837e-03	1.07116e-06	2.69321e-18	2.60061e-01
9.5e+01	1.19016e+00	1.74084e-01	3.10903e-03	0e+00	1.14078e+00	1.31715e-01	3.28262e-03	0e+00	1.33594e+00	4.23687e-02	1.04328e+00	3.21670e-01	2.601e+03	2e+00	-5.55841e-04	1.23165e-04	3.94837e-03	1.07116e-06	2.69321e-18	3.19796e-01
1.0e+02	1.19912e+00	1.81588e-01	3.11225e-03	0e+00	1.14066e+00	1.31605e-01	3.36303e-03	0e+00	1.60156e+00	4.99832e-02	1.05125e+00	3.79797e-01	3.136e+03	2e+00	-5.55841e-04	1.23165e-04	3.94837e-03	1.07116e-06	2.69321e-18	3.85689e-01
