# Supplementary material for: Evaluating the Potential of Younger Cases and Older Controls Cohorts to Improve Discovery Power in Genome-Wide Association Studies of Late-Onset Diseases
Source: MDPI journal article supplement (doi:10.3390/jpm9030038), 2019-07-22
Supplement: s2 [file s2 › SuppFiles/GWAS association and age bias adjustment/Results/LODsCommonLow/LungCancer/AdjustForAge_or115.csv]

age	OR	beta	se	p	OR_adj	beta_adj	se_adj	p_adj	adj	beta_rel	OR_rel
5.3e+01	1.15000e+00	1.39762e-01	3.08933e-03	0e+00	1.15000e+00	1.39762e-01	3.08933e-03	0e+00	0.00000e+00	0.00000e+00	1.00000e+00
5.5e+01	1.15016e+00	1.39905e-01	3.09006e-03	0e+00	1.15001e+00	1.39768e-01	3.09006e-03	0e+00	3.90625e-03	1.36269e-04	1.00014e+00
6.0e+01	1.15271e+00	1.42111e-01	3.09050e-03	0e+00	1.15004e+00	1.39795e-01	3.09092e-03	0e+00	6.64062e-02	2.31686e-03	1.00232e+00
6.5e+01	1.15116e+00	1.40772e-01	3.09026e-03	0e+00	1.14991e+00	1.39683e-01	3.09035e-03	0e+00	3.12500e-02	1.08948e-03	1.00109e+00
7.0e+01	1.15325e+00	1.42587e-01	3.09111e-03	0e+00	1.14996e+00	1.39726e-01	3.09176e-03	0e+00	8.20312e-02	2.86039e-03	1.00286e+00
7.5e+01	1.15715e+00	1.45964e-01	3.09306e-03	0e+00	1.14993e+00	1.39703e-01	3.09616e-03	0e+00	1.79688e-01	6.26103e-03	1.00628e+00
8.0e+01	1.16265e+00	1.50701e-01	3.09448e-03	0e+00	1.15006e+00	1.39818e-01	3.10384e-03	0e+00	3.12500e-01	1.08832e-02	1.01094e+00
8.5e+01	1.16424e+00	1.52070e-01	3.09406e-03	0e+00	1.15008e+00	1.39831e-01	3.10590e-03	0e+00	3.51562e-01	1.22389e-02	1.01231e+00
9.0e+01	1.16850e+00	1.55724e-01	3.09639e-03	0e+00	1.14995e+00	1.39720e-01	3.11678e-03	0e+00	4.60938e-01	1.60037e-02	1.01613e+00
9.5e+01	1.17576e+00	1.61913e-01	3.09892e-03	0e+00	1.14999e+00	1.39755e-01	3.13838e-03	0e+00	6.40625e-01	2.21575e-02	1.02240e+00
1.0e+02	1.17748e+00	1.63377e-01	3.09918e-03	0e+00	1.15000e+00	1.39759e-01	3.14412e-03	0e+00	6.83594e-01	2.36174e-02	1.02390e+00
