# Supplementary material for: Evaluating the Potential of Younger Cases and Older Controls Cohorts to Improve Discovery Power in Genome-Wide Association Studies of Late-Onset Diseases
Source: MDPI journal article supplement (doi:10.3390/jpm9030038), 2019-07-22
Supplement: s2 [file s2 › SuppFiles/GWAS association and age bias adjustment/Results/LODsCommonLow/Stroke/AdjustForAge_or115.csv]

age	OR	beta	se	p	OR_adj	beta_adj	se_adj	p_adj	adj	beta_rel	OR_rel
4.7e+01	1.14661e+00	1.36813e-01	3.09090e-03	0e+00	1.14661e+00	1.36813e-01	3.09090e-03	0e+00	0.00000e+00	0.00000e+00	1.00000e+00
5.0e+01	1.14720e+00	1.37322e-01	3.09099e-03	0e+00	1.14659e+00	1.36789e-01	3.09101e-03	0e+00	1.56250e-02	5.33505e-04	1.00053e+00
5.5e+01	1.14810e+00	1.38109e-01	3.09145e-03	0e+00	1.14657e+00	1.36776e-01	3.09160e-03	0e+00	3.90625e-02	1.33359e-03	1.00133e+00
6.0e+01	1.15079e+00	1.40452e-01	3.09257e-03	0e+00	1.14651e+00	1.36721e-01	3.09372e-03	0e+00	1.09375e-01	3.73169e-03	1.00374e+00
6.5e+01	1.15415e+00	1.43362e-01	3.09376e-03	0e+00	1.14663e+00	1.36830e-01	3.09727e-03	0e+00	1.91406e-01	6.53227e-03	1.00655e+00
7.0e+01	1.15945e+00	1.47950e-01	3.09557e-03	0e+00	1.14657e+00	1.36773e-01	3.10589e-03	0e+00	3.28125e-01	1.11771e-02	1.01124e+00
7.5e+01	1.16684e+00	1.54296e-01	3.09772e-03	0e+00	1.14658e+00	1.36787e-01	3.12325e-03	0e+00	5.15625e-01	1.75090e-02	1.01766e+00
8.0e+01	1.17735e+00	1.63266e-01	3.10153e-03	0e+00	1.14672e+00	1.36902e-01	3.16033e-03	0e+00	7.81250e-01	2.63641e-02	1.02671e+00
8.5e+01	1.18809e+00	1.72345e-01	3.10558e-03	0e+00	1.14668e+00	1.36873e-01	3.21481e-03	0e+00	1.06250e+00	3.54724e-02	1.03611e+00
9.0e+01	1.19953e+00	1.81929e-01	3.10919e-03	0e+00	1.14654e+00	1.36752e-01	3.29305e-03	0e+00	1.37500e+00	4.51773e-02	1.04621e+00
9.5e+01	1.21359e+00	1.93586e-01	3.11412e-03	0e+00	1.14669e+00	1.36881e-01	3.41976e-03	0e+00	1.76562e+00	5.67054e-02	1.05834e+00
1.0e+02	1.22680e+00	2.04413e-01	3.11874e-03	0e+00	1.14656e+00	1.36763e-01	3.58584e-03	0e+00	2.17188e+00	6.76493e-02	1.06999e+00
