# Supplementary material for: Evaluating the Potential of Younger Cases and Older Controls Cohorts to Improve Discovery Power in Genome-Wide Association Studies of Late-Onset Diseases
Source: MDPI journal article supplement (doi:10.3390/jpm9030038), 2019-07-22
Supplement: s2 [file s2 › SuppFiles/GWAS association and age bias adjustment/Windows batches and R scripts/MakeBed.bat]

plink --ped %1.ped --map Plink.map --make-bed --threads 8 --memory 4000 --out %1 

IF NOT "%1" == "Y" ( plink --ped Y_%1.ped --map Plink.map --make-bed --threads 8 --memory 4000 --out Y_%1 )
