# Supplementary material for: Evaluating the Potential of Younger Cases and Older Controls Cohorts to Improve Discovery Power in Genome-Wide Association Studies of Late-Onset Diseases
Source: MDPI journal article supplement (doi:10.3390/jpm9030038), 2019-07-22
Supplement: s2 [file s2 › SuppFiles/GWAS association and age bias adjustment/Windows batches and R scripts/RegressionAdjustForAge.bat]

C:
cd \Apps\PLINK

CALL rscript.exe FindAdjustmentRegressionFunction.R "%1/Alzheimers" AdjustForAge_or115.csv AdjustForAge_or105.csv %2
CALL rscript.exe FindAdjustmentRegressionFunction.R "%1/T2D" AdjustForAge_or115.csv AdjustForAge_or105.csv %2
CALL rscript.exe FindAdjustmentRegressionFunction.R "%1/Stroke" AdjustForAge_or115.csv AdjustForAge_or105.csv %2
CALL rscript.exe FindAdjustmentRegressionFunction.R "%1/CAD" AdjustForAge_or115.csv AdjustForAge_or105.csv %2
CALL rscript.exe FindAdjustmentRegressionFunction.R "%1/BreastCancer" AdjustForAge_or115.csv AdjustForAge_or105.csv %2
CALL rscript.exe FindAdjustmentRegressionFunction.R "%1/ProstateCancer" AdjustForAge_or115.csv AdjustForAge_or105.csv %2
CALL rscript.exe FindAdjustmentRegressionFunction.R "%1/ColorectalCancer" AdjustForAge_or115.csv AdjustForAge_or105.csv %2
CALL rscript.exe FindAdjustmentRegressionFunction.R "%1/LungCancer" AdjustForAge_or115.csv AdjustForAge_or105.csv %2
