# Supplementary material for: Evaluating the Potential of Younger Cases and Older Controls Cohorts to Improve Discovery Power in Genome-Wide Association Studies of Late-Onset Diseases
Source: MDPI journal article supplement (doi:10.3390/jpm9030038), 2019-07-22
Supplement: s2 [file s2 › SuppFiles/GWAS association and age bias adjustment/Windows batches and R scripts/RunMakeBedAll.bat]

START RunMakeBed.bat "%1\Alzheimers\plink"
rem START RunMakeBed.bat "%1\T2D\plink"
rem START RunMakeBed.bat "%1\Stroke\plink"
rem START RunMakeBed.bat "%1\CAD\plink"
rem START RunMakeBed.bat "%1\BreastCancer\plink"
rem START RunMakeBed.bat "%1\ProstateCancer\plink"
rem START RunMakeBed.bat "%1\ColorectalCancer\plink"
rem START RunMakeBed.bat "%1\LungCancer\plink"

PAUSE
