# Supplementary material for: Evaluating the Potential of Younger Cases and Older Controls Cohorts to Improve Discovery Power in Genome-Wide Association Studies of Late-Onset Diseases
Source: MDPI journal article supplement (doi:10.3390/jpm9030038), 2019-07-22
Supplement: s2 [file s2 › SuppFiles/Results/LODsCommonLow/Alzheimers/CasesMultipleSameAgeCohortStatisticalPower.csv]

age	X1	X2	X3	X4	X5	X6	X7	X8	X9
59	1.000e+00	1.000e+00	1.000e+00	1.000e+00	1.000e+00	1.000e+00	1.000e+00	1.000e+00	1.000e+00
60	1.025e+00	1.018e+00	1.025e+00	1.030e+00	1.028e+00	1.028e+00	1.028e+00	1.025e+00	1.025e+00
61	1.051e+00	1.036e+00	1.051e+00	1.060e+00	1.057e+00	1.056e+00	1.057e+00	1.051e+00	1.050e+00
62	1.078e+00	1.056e+00	1.078e+00	1.092e+00	1.087e+00	1.086e+00	1.086e+00	1.079e+00	1.077e+00
63	1.107e+00	1.078e+00	1.107e+00	1.124e+00	1.118e+00	1.117e+00	1.117e+00	1.108e+00	1.105e+00
64	1.137e+00	1.100e+00	1.136e+00	1.158e+00	1.150e+00	1.149e+00	1.148e+00	1.138e+00	1.133e+00
65	1.169e+00	1.125e+00	1.167e+00	1.192e+00	1.183e+00	1.182e+00	1.181e+00	1.170e+00	1.163e+00
66	1.202e+00	1.151e+00	1.200e+00	1.228e+00	1.217e+00	1.216e+00	1.215e+00	1.204e+00	1.193e+00
67	1.237e+00	1.179e+00	1.234e+00	1.265e+00	1.253e+00	1.252e+00	1.250e+00	1.240e+00	1.225e+00
68	1.275e+00	1.208e+00	1.270e+00	1.303e+00	1.290e+00	1.289e+00	1.285e+00	1.278e+00	1.258e+00
69	1.314e+00	1.240e+00	1.308e+00	1.342e+00	1.327e+00	1.328e+00	1.322e+00	1.318e+00	1.292e+00
70	1.354e+00	1.277e+00	1.345e+00	1.382e+00	1.367e+00	1.369e+00	1.361e+00	1.359e+00	1.326e+00
71	1.395e+00	1.319e+00	1.384e+00	1.423e+00	1.407e+00	1.413e+00	1.400e+00	1.402e+00	1.360e+00
72	1.438e+00	1.361e+00	1.423e+00	1.466e+00	1.450e+00	1.456e+00	1.442e+00	1.446e+00	1.396e+00
73	1.483e+00	1.405e+00	1.463e+00	1.510e+00	1.495e+00	1.497e+00	1.485e+00	1.490e+00	1.433e+00
74	1.530e+00	1.452e+00	1.504e+00	1.555e+00	1.542e+00	1.540e+00	1.530e+00	1.536e+00	1.471e+00
75	1.578e+00	1.497e+00	1.545e+00	1.602e+00	1.590e+00	1.582e+00	1.577e+00	1.582e+00	1.512e+00
76	1.628e+00	1.543e+00	1.586e+00	1.650e+00	1.641e+00	1.624e+00	1.626e+00	1.628e+00	1.555e+00
77	1.678e+00	1.590e+00	1.628e+00	1.699e+00	1.691e+00	1.668e+00	1.675e+00	1.675e+00	1.600e+00
78	1.728e+00	1.638e+00	1.672e+00	1.749e+00	1.743e+00	1.713e+00	1.725e+00	1.723e+00	1.646e+00
79	1.779e+00	1.686e+00	1.717e+00	1.800e+00	1.795e+00	1.759e+00	1.775e+00	1.771e+00	1.695e+00
80	1.830e+00	1.736e+00	1.763e+00	1.852e+00	1.845e+00	1.806e+00	1.825e+00	1.821e+00	1.745e+00
81	1.881e+00	1.787e+00	1.811e+00	1.905e+00	1.895e+00	1.854e+00	1.875e+00	1.871e+00	1.797e+00
82	1.933e+00	1.839e+00	1.859e+00	1.959e+00	1.944e+00	1.903e+00	1.926e+00	1.922e+00	1.850e+00
83	1.985e+00	1.892e+00	1.907e+00	2.013e+00	1.994e+00	1.954e+00	1.978e+00	1.973e+00	1.905e+00
84	2.037e+00	1.947e+00	1.957e+00	2.068e+00	2.042e+00	2.007e+00	2.029e+00	2.025e+00	1.963e+00
85	2.089e+00	2.001e+00	2.005e+00	2.122e+00	2.090e+00	2.060e+00	2.080e+00	2.077e+00	2.019e+00
86	2.143e+00	2.055e+00	2.056e+00	2.176e+00	2.141e+00	2.116e+00	2.134e+00	2.130e+00	2.075e+00
87	2.197e+00	2.109e+00	2.109e+00	2.230e+00	2.192e+00	2.176e+00	2.188e+00	2.185e+00	2.132e+00
88	2.248e+00	2.158e+00	2.155e+00	2.281e+00	2.240e+00	2.230e+00	2.238e+00	2.235e+00	2.183e+00
89	2.301e+00	2.205e+00	2.199e+00	2.332e+00	2.293e+00	2.284e+00	2.290e+00	2.285e+00	2.232e+00
90	2.349e+00	2.247e+00	2.237e+00	2.378e+00	2.342e+00	2.334e+00	2.338e+00	2.330e+00	2.276e+00
91	2.388e+00	2.282e+00	2.264e+00	2.416e+00	2.381e+00	2.369e+00	2.375e+00	2.366e+00	2.310e+00
92	2.420e+00	2.311e+00	2.283e+00	2.449e+00	2.416e+00	2.396e+00	2.408e+00	2.396e+00	2.336e+00
93	2.436e+00	2.325e+00	2.291e+00	2.465e+00	2.433e+00	2.406e+00	2.423e+00	2.411e+00	2.348e+00
94	2.436e+00	2.325e+00	2.288e+00	2.466e+00	2.433e+00	2.399e+00	2.421e+00	2.410e+00	2.345e+00
95	2.423e+00	2.313e+00	2.276e+00	2.454e+00	2.420e+00	2.380e+00	2.406e+00	2.398e+00	2.329e+00
96	2.397e+00	2.288e+00	2.253e+00	2.429e+00	2.393e+00	2.345e+00	2.377e+00	2.372e+00	2.301e+00
97	2.359e+00	2.251e+00	2.221e+00	2.392e+00	2.355e+00	2.299e+00	2.336e+00	2.335e+00	2.262e+00
98	2.309e+00	2.204e+00	2.181e+00	2.344e+00	2.304e+00	2.241e+00	2.284e+00	2.286e+00	2.212e+00
99	2.247e+00	2.147e+00	2.132e+00	2.284e+00	2.241e+00	2.172e+00	2.220e+00	2.227e+00	2.151e+00
100	2.176e+00	2.080e+00	2.076e+00	2.214e+00	2.169e+00	2.095e+00	2.146e+00	2.158e+00	2.082e+00
