# Supplementary material for: Evaluating the Potential of Younger Cases and Older Controls Cohorts to Improve Discovery Power in Genome-Wide Association Studies of Late-Onset Diseases
Source: MDPI journal article supplement (doi:10.3390/jpm9030038), 2019-07-22
Supplement: s2 [file s2 › SuppFiles/Results/LODsCommonLow/Alzheimers/CasesMultipleYoungOldCohortStatisticalPower.csv]

age	X1	X2	X3	X4	X5	X6	X7	X8	X9
59	1.000e+00	1.000e+00	1.000e+00	1.000e+00	1.000e+00	1.000e+00	1.000e+00	1.000e+00	1.000e+00
60	9.998e-01	9.997e-01	9.999e-01	9.998e-01	9.999e-01	9.999e-01	9.998e-01	9.999e-01	9.998e-01
61	9.991e-01	9.990e-01	9.993e-01	9.993e-01	9.994e-01	9.993e-01	9.993e-01	9.994e-01	9.993e-01
62	9.982e-01	9.980e-01	9.984e-01	9.984e-01	9.985e-01	9.984e-01	9.983e-01	9.985e-01	9.983e-01
63	9.967e-01	9.965e-01	9.971e-01	9.972e-01	9.971e-01	9.971e-01	9.970e-01	9.972e-01	9.970e-01
64	9.949e-01	9.946e-01	9.953e-01	9.954e-01	9.954e-01	9.953e-01	9.952e-01	9.955e-01	9.951e-01
65	9.927e-01	9.923e-01	9.932e-01	9.933e-01	9.932e-01	9.931e-01	9.931e-01	9.933e-01	9.929e-01
66	9.900e-01	9.897e-01	9.906e-01	9.909e-01	9.907e-01	9.905e-01	9.906e-01	9.908e-01	9.903e-01
67	9.870e-01	9.866e-01	9.877e-01	9.880e-01	9.877e-01	9.875e-01	9.876e-01	9.878e-01	9.871e-01
68	9.837e-01	9.834e-01	9.844e-01	9.849e-01	9.845e-01	9.842e-01	9.844e-01	9.846e-01	9.838e-01
69	9.800e-01	9.796e-01	9.808e-01	9.813e-01	9.809e-01	9.806e-01	9.808e-01	9.810e-01	9.800e-01
70	9.758e-01	9.755e-01	9.767e-01	9.773e-01	9.768e-01	9.765e-01	9.768e-01	9.769e-01	9.758e-01
71	9.715e-01	9.712e-01	9.723e-01	9.730e-01	9.724e-01	9.721e-01	9.724e-01	9.726e-01	9.714e-01
72	9.660e-01	9.658e-01	9.670e-01	9.677e-01	9.671e-01	9.668e-01	9.671e-01	9.673e-01	9.660e-01
73	9.600e-01	9.600e-01	9.610e-01	9.618e-01	9.614e-01	9.610e-01	9.614e-01	9.616e-01	9.601e-01
74	9.532e-01	9.534e-01	9.542e-01	9.552e-01	9.549e-01	9.544e-01	9.548e-01	9.549e-01	9.535e-01
75	9.454e-01	9.458e-01	9.464e-01	9.477e-01	9.474e-01	9.468e-01	9.473e-01	9.473e-01	9.459e-01
76	9.370e-01	9.376e-01	9.380e-01	9.395e-01	9.396e-01	9.386e-01	9.391e-01	9.392e-01	9.378e-01
77	9.272e-01	9.280e-01	9.280e-01	9.298e-01	9.302e-01	9.290e-01	9.296e-01	9.295e-01	9.281e-01
78	9.164e-01	9.173e-01	9.171e-01	9.193e-01	9.198e-01	9.184e-01	9.191e-01	9.189e-01	9.174e-01
79	9.046e-01	9.054e-01	9.049e-01	9.076e-01	9.081e-01	9.066e-01	9.073e-01	9.071e-01	9.055e-01
80	8.912e-01	8.922e-01	8.913e-01	8.945e-01	8.948e-01	8.934e-01	8.942e-01	8.939e-01	8.921e-01
81	8.770e-01	8.781e-01	8.768e-01	8.807e-01	8.807e-01	8.794e-01	8.802e-01	8.799e-01	8.778e-01
82	8.612e-01	8.622e-01	8.605e-01	8.650e-01	8.647e-01	8.634e-01	8.645e-01	8.641e-01	8.619e-01
83	8.439e-01	8.448e-01	8.430e-01	8.481e-01	8.473e-01	8.461e-01	8.474e-01	8.469e-01	8.447e-01
84	8.258e-01	8.265e-01	8.246e-01	8.301e-01	8.290e-01	8.277e-01	8.294e-01	8.289e-01	8.267e-01
85	8.060e-01	8.064e-01	8.046e-01	8.105e-01	8.090e-01	8.079e-01	8.097e-01	8.091e-01	8.070e-01
86	7.850e-01	7.851e-01	7.838e-01	7.897e-01	7.881e-01	7.873e-01	7.890e-01	7.883e-01	7.861e-01
87	7.632e-01	7.630e-01	7.624e-01	7.680e-01	7.665e-01	7.659e-01	7.674e-01	7.666e-01	7.643e-01
88	7.402e-01	7.396e-01	7.393e-01	7.452e-01	7.436e-01	7.430e-01	7.445e-01	7.436e-01	7.412e-01
89	7.165e-01	7.152e-01	7.153e-01	7.215e-01	7.202e-01	7.195e-01	7.209e-01	7.198e-01	7.171e-01
90	6.920e-01	6.901e-01	6.904e-01	6.972e-01	6.959e-01	6.950e-01	6.966e-01	6.952e-01	6.922e-01
91	6.666e-01	6.643e-01	6.640e-01	6.720e-01	6.706e-01	6.692e-01	6.712e-01	6.697e-01	6.664e-01
92	6.408e-01	6.381e-01	6.372e-01	6.465e-01	6.448e-01	6.430e-01	6.455e-01	6.439e-01	6.403e-01
93	6.143e-01	6.117e-01	6.102e-01	6.204e-01	6.184e-01	6.161e-01	6.191e-01	6.174e-01	6.136e-01
94	5.875e-01	5.849e-01	5.830e-01	5.939e-01	5.917e-01	5.890e-01	5.922e-01	5.908e-01	5.869e-01
95	5.609e-01	5.584e-01	5.561e-01	5.675e-01	5.649e-01	5.619e-01	5.653e-01	5.643e-01	5.602e-01
96	5.343e-01	5.321e-01	5.294e-01	5.413e-01	5.383e-01	5.350e-01	5.386e-01	5.379e-01	5.339e-01
97	5.082e-01	5.062e-01	5.033e-01	5.155e-01	5.121e-01	5.086e-01	5.122e-01	5.119e-01	5.079e-01
98	4.827e-01	4.809e-01	4.777e-01	4.901e-01	4.865e-01	4.827e-01	4.864e-01	4.865e-01	4.826e-01
99	4.577e-01	4.563e-01	4.528e-01	4.652e-01	4.614e-01	4.574e-01	4.611e-01	4.617e-01	4.579e-01
100	4.334e-01	4.324e-01	4.287e-01	4.412e-01	4.370e-01	4.328e-01	4.366e-01	4.376e-01	4.339e-01
