# Supplementary material for: Evaluating the Potential of Younger Cases and Older Controls Cohorts to Improve Discovery Power in Genome-Wide Association Studies of Late-Onset Diseases
Source: MDPI journal article supplement (doi:10.3390/jpm9030038), 2019-07-22
Supplement: s2 [file s2 › SuppFiles/Results/LODsCommonLow/Alzheimers/CasesNeededCohortStatisticalPower.csv]

age	X1	X2	X3	X4	X5	X6	X7	X8	X9
59	1.477e+05	3.563e+05	1.398e+06	4.623e+04	1.076e+05	4.487e+05	3.495e+04	8.330e+04	3.646e+05
60	1.513e+05	3.626e+05	1.433e+06	4.760e+04	1.107e+05	4.611e+05	3.593e+04	8.538e+04	3.736e+05
61	1.552e+05	3.693e+05	1.470e+06	4.901e+04	1.138e+05	4.739e+05	3.693e+04	8.757e+04	3.830e+05
62	1.592e+05	3.764e+05	1.508e+06	5.047e+04	1.170e+05	4.873e+05	3.796e+04	8.987e+04	3.927e+05
63	1.635e+05	3.840e+05	1.548e+06	5.197e+04	1.203e+05	5.012e+05	3.903e+04	9.229e+04	4.028e+05
64	1.679e+05	3.921e+05	1.589e+06	5.352e+04	1.238e+05	5.155e+05	4.014e+04	9.482e+04	4.132e+05
65	1.726e+05	4.008e+05	1.632e+06	5.512e+04	1.274e+05	5.304e+05	4.128e+04	9.750e+04	4.239e+05
66	1.775e+05	4.100e+05	1.678e+06	5.677e+04	1.310e+05	5.458e+05	4.245e+04	1.003e+05	4.350e+05
67	1.827e+05	4.200e+05	1.726e+06	5.847e+04	1.349e+05	5.617e+05	4.367e+04	1.033e+05	4.465e+05
68	1.883e+05	4.305e+05	1.777e+06	6.022e+04	1.388e+05	5.785e+05	4.493e+04	1.064e+05	4.586e+05
69	1.941e+05	4.418e+05	1.829e+06	6.203e+04	1.429e+05	5.960e+05	4.622e+04	1.098e+05	4.712e+05
70	1.999e+05	4.550e+05	1.881e+06	6.389e+04	1.471e+05	6.144e+05	4.756e+04	1.132e+05	4.835e+05
71	2.060e+05	4.698e+05	1.935e+06	6.580e+04	1.515e+05	6.337e+05	4.895e+04	1.168e+05	4.960e+05
72	2.123e+05	4.849e+05	1.991e+06	6.776e+04	1.560e+05	6.531e+05	5.039e+04	1.204e+05	5.090e+05
73	2.190e+05	5.008e+05	2.046e+06	6.979e+04	1.609e+05	6.719e+05	5.192e+04	1.242e+05	5.224e+05
74	2.259e+05	5.172e+05	2.103e+06	7.189e+04	1.659e+05	6.909e+05	5.349e+04	1.280e+05	5.362e+05
75	2.330e+05	5.333e+05	2.160e+06	7.404e+04	1.711e+05	7.099e+05	5.512e+04	1.318e+05	5.512e+05
76	2.403e+05	5.498e+05	2.218e+06	7.627e+04	1.766e+05	7.287e+05	5.682e+04	1.356e+05	5.670e+05
77	2.477e+05	5.667e+05	2.277e+06	7.854e+04	1.821e+05	7.482e+05	5.854e+04	1.395e+05	5.833e+05
78	2.552e+05	5.835e+05	2.338e+06	8.085e+04	1.876e+05	7.684e+05	6.028e+04	1.435e+05	6.003e+05
79	2.627e+05	6.007e+05	2.401e+06	8.320e+04	1.932e+05	7.891e+05	6.204e+04	1.476e+05	6.178e+05
80	2.702e+05	6.186e+05	2.466e+06	8.562e+04	1.986e+05	8.102e+05	6.379e+04	1.517e+05	6.361e+05
81	2.778e+05	6.369e+05	2.532e+06	8.809e+04	2.040e+05	8.317e+05	6.555e+04	1.559e+05	6.552e+05
82	2.854e+05	6.553e+05	2.599e+06	9.056e+04	2.093e+05	8.538e+05	6.733e+04	1.601e+05	6.746e+05
83	2.931e+05	6.744e+05	2.667e+06	9.307e+04	2.146e+05	8.768e+05	6.912e+04	1.644e+05	6.947e+05
84	3.008e+05	6.940e+05	2.736e+06	9.560e+04	2.198e+05	9.006e+05	7.093e+04	1.687e+05	7.158e+05
85	3.085e+05	7.130e+05	2.804e+06	9.809e+04	2.250e+05	9.242e+05	7.272e+04	1.730e+05	7.363e+05
86	3.164e+05	7.321e+05	2.875e+06	1.006e+05	2.304e+05	9.495e+05	7.457e+04	1.775e+05	7.565e+05
87	3.244e+05	7.514e+05	2.949e+06	1.031e+05	2.359e+05	9.762e+05	7.647e+04	1.820e+05	7.772e+05
88	3.319e+05	7.689e+05	3.014e+06	1.054e+05	2.411e+05	1.000e+06	7.823e+04	1.862e+05	7.959e+05
89	3.398e+05	7.856e+05	3.075e+06	1.078e+05	2.468e+05	1.025e+06	8.004e+04	1.903e+05	8.140e+05
90	3.469e+05	8.006e+05	3.129e+06	1.099e+05	2.521e+05	1.047e+06	8.171e+04	1.941e+05	8.299e+05
91	3.526e+05	8.130e+05	3.166e+06	1.117e+05	2.563e+05	1.063e+06	8.302e+04	1.971e+05	8.422e+05
92	3.574e+05	8.234e+05	3.192e+06	1.132e+05	2.600e+05	1.075e+06	8.415e+04	1.996e+05	8.518e+05
93	3.597e+05	8.286e+05	3.204e+06	1.140e+05	2.619e+05	1.079e+06	8.467e+04	2.009e+05	8.561e+05
94	3.597e+05	8.285e+05	3.200e+06	1.140e+05	2.619e+05	1.076e+06	8.461e+04	2.008e+05	8.549e+05
95	3.578e+05	8.242e+05	3.182e+06	1.135e+05	2.605e+05	1.068e+06	8.410e+04	1.998e+05	8.493e+05
96	3.539e+05	8.152e+05	3.151e+06	1.123e+05	2.576e+05	1.052e+06	8.309e+04	1.976e+05	8.390e+05
97	3.483e+05	8.022e+05	3.106e+06	1.106e+05	2.534e+05	1.032e+06	8.166e+04	1.945e+05	8.246e+05
98	3.409e+05	7.855e+05	3.050e+06	1.084e+05	2.480e+05	1.006e+06	7.982e+04	1.904e+05	8.064e+05
99	3.318e+05	7.649e+05	2.981e+06	1.056e+05	2.412e+05	9.747e+05	7.758e+04	1.855e+05	7.842e+05
100	3.213e+05	7.411e+05	2.902e+06	1.024e+05	2.334e+05	9.397e+05	7.502e+04	1.798e+05	7.590e+05
