# Supplementary material for: Evaluating the Potential of Younger Cases and Older Controls Cohorts to Improve Discovery Power in Genome-Wide Association Studies of Late-Onset Diseases
Source: MDPI journal article supplement (doi:10.3390/jpm9030038), 2019-07-22
Supplement: s2 [file s2 › SuppFiles/Results/LODsCommonLow/Alzheimers/CasesNeededYoungOldCohortStatisticalPower.csv]

age	X1	X2	X3	X4	X5	X6	X7	X8	X9
59	1.477e+05	3.563e+05	1.398e+06	4.623e+04	1.076e+05	4.487e+05	3.495e+04	8.330e+04	3.646e+05
60	1.476e+05	3.562e+05	1.398e+06	4.622e+04	1.076e+05	4.486e+05	3.495e+04	8.329e+04	3.645e+05
61	1.475e+05	3.560e+05	1.397e+06	4.620e+04	1.076e+05	4.483e+05	3.493e+04	8.325e+04	3.643e+05
62	1.474e+05	3.556e+05	1.396e+06	4.616e+04	1.075e+05	4.479e+05	3.489e+04	8.318e+04	3.640e+05
63	1.472e+05	3.551e+05	1.394e+06	4.610e+04	1.073e+05	4.473e+05	3.485e+04	8.306e+04	3.635e+05
64	1.469e+05	3.544e+05	1.392e+06	4.602e+04	1.071e+05	4.465e+05	3.479e+04	8.292e+04	3.628e+05
65	1.466e+05	3.536e+05	1.389e+06	4.592e+04	1.069e+05	4.456e+05	3.471e+04	8.274e+04	3.620e+05
66	1.462e+05	3.527e+05	1.385e+06	4.581e+04	1.066e+05	4.444e+05	3.462e+04	8.253e+04	3.611e+05
67	1.458e+05	3.516e+05	1.381e+06	4.568e+04	1.063e+05	4.430e+05	3.452e+04	8.229e+04	3.599e+05
68	1.453e+05	3.504e+05	1.377e+06	4.553e+04	1.060e+05	4.416e+05	3.441e+04	8.202e+04	3.587e+05
69	1.447e+05	3.491e+05	1.372e+06	4.536e+04	1.056e+05	4.399e+05	3.428e+04	8.172e+04	3.573e+05
70	1.441e+05	3.476e+05	1.366e+06	4.518e+04	1.051e+05	4.381e+05	3.414e+04	8.138e+04	3.558e+05
71	1.435e+05	3.461e+05	1.360e+06	4.498e+04	1.047e+05	4.362e+05	3.399e+04	8.102e+04	3.542e+05
72	1.427e+05	3.442e+05	1.352e+06	4.474e+04	1.041e+05	4.337e+05	3.380e+04	8.058e+04	3.522e+05
73	1.418e+05	3.421e+05	1.344e+06	4.447e+04	1.035e+05	4.312e+05	3.360e+04	8.010e+04	3.501e+05
74	1.408e+05	3.397e+05	1.334e+06	4.416e+04	1.028e+05	4.282e+05	3.337e+04	7.954e+04	3.476e+05
75	1.396e+05	3.370e+05	1.323e+06	4.381e+04	1.020e+05	4.248e+05	3.311e+04	7.891e+04	3.449e+05
76	1.384e+05	3.341e+05	1.312e+06	4.343e+04	1.011e+05	4.211e+05	3.283e+04	7.823e+04	3.419e+05
77	1.369e+05	3.307e+05	1.298e+06	4.299e+04	1.001e+05	4.168e+05	3.249e+04	7.743e+04	3.384e+05
78	1.353e+05	3.269e+05	1.282e+06	4.250e+04	9.900e+04	4.120e+05	3.212e+04	7.655e+04	3.345e+05
79	1.336e+05	3.226e+05	1.265e+06	4.196e+04	9.775e+04	4.068e+05	3.171e+04	7.556e+04	3.301e+05
80	1.316e+05	3.179e+05	1.246e+06	4.135e+04	9.632e+04	4.008e+05	3.125e+04	7.446e+04	3.253e+05
81	1.295e+05	3.129e+05	1.226e+06	4.071e+04	9.479e+04	3.945e+05	3.077e+04	7.330e+04	3.200e+05
82	1.272e+05	3.072e+05	1.203e+06	3.999e+04	9.308e+04	3.874e+05	3.022e+04	7.198e+04	3.142e+05
83	1.246e+05	3.010e+05	1.179e+06	3.921e+04	9.121e+04	3.796e+05	2.962e+04	7.055e+04	3.080e+05
84	1.219e+05	2.945e+05	1.153e+06	3.837e+04	8.923e+04	3.714e+05	2.899e+04	6.905e+04	3.014e+05
85	1.190e+05	2.873e+05	1.125e+06	3.747e+04	8.708e+04	3.625e+05	2.830e+04	6.740e+04	2.942e+05
86	1.159e+05	2.798e+05	1.096e+06	3.651e+04	8.483e+04	3.532e+05	2.758e+04	6.566e+04	2.866e+05
87	1.127e+05	2.719e+05	1.066e+06	3.551e+04	8.250e+04	3.436e+05	2.682e+04	6.386e+04	2.787e+05
88	1.093e+05	2.635e+05	1.034e+06	3.445e+04	8.003e+04	3.333e+05	2.602e+04	6.195e+04	2.702e+05
89	1.058e+05	2.549e+05	1.000e+06	3.336e+04	7.752e+04	3.228e+05	2.520e+04	5.996e+04	2.614e+05
90	1.022e+05	2.459e+05	9.654e+05	3.223e+04	7.490e+04	3.118e+05	2.435e+04	5.791e+04	2.524e+05
91	9.844e+04	2.367e+05	9.286e+05	3.107e+04	7.218e+04	3.002e+05	2.346e+04	5.579e+04	2.430e+05
92	9.462e+04	2.274e+05	8.911e+05	2.989e+04	6.941e+04	2.885e+05	2.256e+04	5.363e+04	2.334e+05
93	9.072e+04	2.179e+05	8.533e+05	2.868e+04	6.657e+04	2.764e+05	2.164e+04	5.143e+04	2.237e+05
94	8.676e+04	2.084e+05	8.153e+05	2.746e+04	6.369e+04	2.643e+05	2.070e+04	4.921e+04	2.140e+05
95	8.282e+04	1.990e+05	7.776e+05	2.624e+04	6.081e+04	2.521e+05	1.976e+04	4.700e+04	2.043e+05
96	7.891e+04	1.896e+05	7.403e+05	2.502e+04	5.794e+04	2.400e+05	1.882e+04	4.481e+04	1.947e+05
97	7.505e+04	1.804e+05	7.038e+05	2.383e+04	5.513e+04	2.282e+05	1.790e+04	4.265e+04	1.852e+05
98	7.128e+04	1.714e+05	6.680e+05	2.265e+04	5.236e+04	2.165e+05	1.700e+04	4.053e+04	1.760e+05
99	6.759e+04	1.626e+05	6.332e+05	2.151e+04	4.966e+04	2.052e+05	1.612e+04	3.846e+04	1.669e+05
100	6.399e+04	1.541e+05	5.995e+05	2.039e+04	4.704e+04	1.942e+05	1.526e+04	3.645e+04	1.582e+05
