# Supplementary material for: Evaluating the Potential of Younger Cases and Older Controls Cohorts to Improve Discovery Power in Genome-Wide Association Studies of Late-Onset Diseases
Source: MDPI journal article supplement (doi:10.3390/jpm9030038), 2019-07-22
Supplement: s2 [file s2 › SuppFiles/Results/LODsCommonLow/BreastCancer/CasesMultipleYoungOldCohortStatisticalPower.csv]

age	X1	X2	X3	X4	X5	X6	X7	X8	X9
35	1.000e+00	1.000e+00	1.000e+00	1.000e+00	1.000e+00	1.000e+00	1.000e+00	1.000e+00	1.000e+00
36	9.989e-01	9.989e-01	9.989e-01	9.989e-01	9.989e-01	9.989e-01	9.989e-01	9.989e-01	9.989e-01
37	9.976e-01	9.976e-01	9.975e-01	9.976e-01	9.976e-01	9.977e-01	9.976e-01	9.976e-01	9.976e-01
38	9.961e-01	9.960e-01	9.959e-01	9.961e-01	9.961e-01	9.963e-01	9.961e-01	9.961e-01	9.961e-01
39	9.943e-01	9.942e-01	9.942e-01	9.943e-01	9.944e-01	9.946e-01	9.943e-01	9.944e-01	9.944e-01
40	9.923e-01	9.922e-01	9.922e-01	9.923e-01	9.924e-01	9.926e-01	9.924e-01	9.925e-01	9.925e-01
41	9.900e-01	9.899e-01	9.899e-01	9.901e-01	9.902e-01	9.904e-01	9.902e-01	9.903e-01	9.903e-01
42	9.876e-01	9.875e-01	9.874e-01	9.877e-01	9.878e-01	9.881e-01	9.878e-01	9.880e-01	9.879e-01
43	9.849e-01	9.848e-01	9.848e-01	9.850e-01	9.852e-01	9.855e-01	9.853e-01	9.855e-01	9.854e-01
44	9.821e-01	9.820e-01	9.820e-01	9.823e-01	9.825e-01	9.828e-01	9.825e-01	9.827e-01	9.826e-01
45	9.790e-01	9.789e-01	9.789e-01	9.792e-01	9.794e-01	9.797e-01	9.795e-01	9.796e-01	9.795e-01
46	9.758e-01	9.757e-01	9.757e-01	9.759e-01	9.761e-01	9.765e-01	9.763e-01	9.765e-01	9.764e-01
47	9.722e-01	9.721e-01	9.722e-01	9.725e-01	9.728e-01	9.731e-01	9.730e-01	9.731e-01	9.730e-01
48	9.685e-01	9.685e-01	9.686e-01	9.689e-01	9.692e-01	9.695e-01	9.694e-01	9.695e-01	9.694e-01
49	9.646e-01	9.646e-01	9.647e-01	9.650e-01	9.653e-01	9.657e-01	9.656e-01	9.657e-01	9.656e-01
50	9.605e-01	9.605e-01	9.607e-01	9.610e-01	9.614e-01	9.617e-01	9.616e-01	9.617e-01	9.617e-01
51	9.562e-01	9.563e-01	9.565e-01	9.568e-01	9.572e-01	9.575e-01	9.575e-01	9.575e-01	9.575e-01
52	9.518e-01	9.519e-01	9.521e-01	9.524e-01	9.528e-01	9.531e-01	9.532e-01	9.532e-01	9.532e-01
53	9.471e-01	9.472e-01	9.475e-01	9.477e-01	9.481e-01	9.484e-01	9.486e-01	9.486e-01	9.485e-01
54	9.422e-01	9.424e-01	9.427e-01	9.429e-01	9.434e-01	9.437e-01	9.439e-01	9.438e-01	9.438e-01
55	9.374e-01	9.377e-01	9.380e-01	9.382e-01	9.387e-01	9.390e-01	9.392e-01	9.392e-01	9.391e-01
56	9.325e-01	9.329e-01	9.333e-01	9.334e-01	9.338e-01	9.342e-01	9.345e-01	9.344e-01	9.343e-01
57	9.275e-01	9.279e-01	9.283e-01	9.285e-01	9.289e-01	9.292e-01	9.296e-01	9.295e-01	9.295e-01
58	9.224e-01	9.228e-01	9.233e-01	9.234e-01	9.239e-01	9.241e-01	9.246e-01	9.245e-01	9.244e-01
59	9.174e-01	9.178e-01	9.184e-01	9.184e-01	9.189e-01	9.191e-01	9.196e-01	9.195e-01	9.195e-01
60	9.123e-01	9.128e-01	9.134e-01	9.135e-01	9.139e-01	9.142e-01	9.147e-01	9.146e-01	9.146e-01
61	9.072e-01	9.077e-01	9.084e-01	9.084e-01	9.088e-01	9.092e-01	9.097e-01	9.096e-01	9.096e-01
62	9.021e-01	9.025e-01	9.033e-01	9.033e-01	9.037e-01	9.041e-01	9.047e-01	9.046e-01	9.046e-01
63	8.970e-01	8.975e-01	8.983e-01	8.984e-01	8.987e-01	8.991e-01	8.997e-01	8.996e-01	8.996e-01
64	8.919e-01	8.924e-01	8.933e-01	8.933e-01	8.936e-01	8.941e-01	8.947e-01	8.945e-01	8.946e-01
65	8.868e-01	8.873e-01	8.882e-01	8.883e-01	8.886e-01	8.890e-01	8.898e-01	8.896e-01	8.897e-01
66	8.817e-01	8.822e-01	8.832e-01	8.832e-01	8.835e-01	8.840e-01	8.848e-01	8.845e-01	8.847e-01
67	8.767e-01	8.770e-01	8.782e-01	8.782e-01	8.785e-01	8.790e-01	8.798e-01	8.795e-01	8.797e-01
68	8.717e-01	8.721e-01	8.732e-01	8.732e-01	8.735e-01	8.740e-01	8.748e-01	8.746e-01	8.747e-01
69	8.666e-01	8.670e-01	8.682e-01	8.682e-01	8.684e-01	8.689e-01	8.698e-01	8.696e-01	8.697e-01
70	8.616e-01	8.619e-01	8.632e-01	8.631e-01	8.634e-01	8.639e-01	8.648e-01	8.647e-01	8.647e-01
71	8.566e-01	8.568e-01	8.583e-01	8.581e-01	8.583e-01	8.588e-01	8.598e-01	8.597e-01	8.597e-01
72	8.516e-01	8.518e-01	8.532e-01	8.531e-01	8.534e-01	8.538e-01	8.549e-01	8.548e-01	8.547e-01
73	8.466e-01	8.468e-01	8.483e-01	8.482e-01	8.484e-01	8.487e-01	8.499e-01	8.498e-01	8.498e-01
74	8.416e-01	8.418e-01	8.432e-01	8.431e-01	8.434e-01	8.436e-01	8.450e-01	8.449e-01	8.447e-01
75	8.367e-01	8.369e-01	8.382e-01	8.382e-01	8.384e-01	8.386e-01	8.400e-01	8.399e-01	8.397e-01
76	8.317e-01	8.320e-01	8.333e-01	8.332e-01	8.335e-01	8.336e-01	8.351e-01	8.350e-01	8.348e-01
77	8.268e-01	8.271e-01	8.282e-01	8.283e-01	8.287e-01	8.287e-01	8.302e-01	8.301e-01	8.298e-01
78	8.219e-01	8.223e-01	8.232e-01	8.234e-01	8.237e-01	8.237e-01	8.253e-01	8.252e-01	8.249e-01
79	8.170e-01	8.174e-01	8.182e-01	8.185e-01	8.188e-01	8.188e-01	8.204e-01	8.203e-01	8.200e-01
80	8.122e-01	8.126e-01	8.133e-01	8.137e-01	8.140e-01	8.140e-01	8.155e-01	8.154e-01	8.152e-01
81	8.073e-01	8.078e-01	8.084e-01	8.089e-01	8.093e-01	8.092e-01	8.108e-01	8.106e-01	8.103e-01
82	8.025e-01	8.032e-01	8.036e-01	8.041e-01	8.045e-01	8.044e-01	8.060e-01	8.058e-01	8.056e-01
83	7.977e-01	7.985e-01	7.986e-01	7.993e-01	7.997e-01	7.998e-01	8.013e-01	8.010e-01	8.007e-01
84	7.929e-01	7.937e-01	7.939e-01	7.946e-01	7.951e-01	7.951e-01	7.966e-01	7.963e-01	7.961e-01
85	7.883e-01	7.891e-01	7.891e-01	7.899e-01	7.904e-01	7.905e-01	7.919e-01	7.916e-01	7.914e-01
86	7.836e-01	7.845e-01	7.843e-01	7.852e-01	7.858e-01	7.859e-01	7.874e-01	7.871e-01	7.869e-01
87	7.790e-01	7.798e-01	7.796e-01	7.806e-01	7.812e-01	7.813e-01	7.828e-01	7.825e-01	7.823e-01
88	7.744e-01	7.753e-01	7.750e-01	7.761e-01	7.766e-01	7.768e-01	7.783e-01	7.780e-01	7.778e-01
89	7.699e-01	7.707e-01	7.705e-01	7.715e-01	7.721e-01	7.723e-01	7.738e-01	7.734e-01	7.733e-01
90	7.654e-01	7.662e-01	7.660e-01	7.671e-01	7.677e-01	7.678e-01	7.693e-01	7.689e-01	7.687e-01
91	7.609e-01	7.617e-01	7.616e-01	7.626e-01	7.632e-01	7.634e-01	7.649e-01	7.644e-01	7.643e-01
92	7.565e-01	7.572e-01	7.573e-01	7.582e-01	7.589e-01	7.590e-01	7.605e-01	7.599e-01	7.599e-01
93	7.520e-01	7.527e-01	7.529e-01	7.538e-01	7.545e-01	7.547e-01	7.562e-01	7.555e-01	7.554e-01
94	7.477e-01	7.483e-01	7.487e-01	7.495e-01	7.501e-01	7.504e-01	7.518e-01	7.511e-01	7.510e-01
95	7.434e-01	7.439e-01	7.445e-01	7.453e-01	7.459e-01	7.461e-01	7.475e-01	7.468e-01	7.466e-01
96	7.391e-01	7.395e-01	7.404e-01	7.410e-01	7.417e-01	7.419e-01	7.433e-01	7.424e-01	7.423e-01
97	7.348e-01	7.352e-01	7.363e-01	7.368e-01	7.374e-01	7.377e-01	7.390e-01	7.381e-01	7.380e-01
98	7.306e-01	7.308e-01	7.324e-01	7.326e-01	7.333e-01	7.336e-01	7.348e-01	7.338e-01	7.337e-01
99	7.264e-01	7.265e-01	7.284e-01	7.285e-01	7.292e-01	7.294e-01	7.306e-01	7.295e-01	7.294e-01
100	7.223e-01	7.222e-01	7.245e-01	7.244e-01	7.251e-01	7.253e-01	7.265e-01	7.253e-01	7.252e-01
