# Supplementary material for: Evaluating the Potential of Younger Cases and Older Controls Cohorts to Improve Discovery Power in Genome-Wide Association Studies of Late-Onset Diseases
Source: MDPI journal article supplement (doi:10.3390/jpm9030038), 2019-07-22
Supplement: s2 [file s2 › SuppFiles/Results/LODsCommonLow/BreastCancer/CasesNeededCohortStatisticalPower.csv]

age	X1	X2	X3	X4	X5	X6	X7	X8	X9
35	4.930e+04	1.143e+05	4.683e+05	1.591e+04	3.701e+04	1.525e+05	1.204e+04	2.873e+04	1.219e+05
36	4.949e+04	1.146e+05	4.697e+05	1.596e+04	3.712e+04	1.530e+05	1.207e+04	2.881e+04	1.222e+05
37	4.969e+04	1.148e+05	4.712e+05	1.602e+04	3.723e+04	1.535e+05	1.211e+04	2.889e+04	1.225e+05
38	4.988e+04	1.151e+05	4.728e+05	1.607e+04	3.735e+04	1.540e+05	1.215e+04	2.897e+04	1.229e+05
39	5.008e+04	1.153e+05	4.743e+05	1.613e+04	3.747e+04	1.545e+05	1.219e+04	2.906e+04	1.232e+05
40	5.028e+04	1.156e+05	4.760e+05	1.619e+04	3.759e+04	1.550e+05	1.223e+04	2.916e+04	1.236e+05
41	5.048e+04	1.159e+05	4.777e+05	1.625e+04	3.772e+04	1.556e+05	1.227e+04	2.926e+04	1.240e+05
42	5.069e+04	1.163e+05	4.795e+05	1.631e+04	3.786e+04	1.561e+05	1.231e+04	2.936e+04	1.245e+05
43	5.089e+04	1.166e+05	4.812e+05	1.637e+04	3.800e+04	1.566e+05	1.236e+04	2.947e+04	1.249e+05
44	5.110e+04	1.170e+05	4.830e+05	1.644e+04	3.814e+04	1.572e+05	1.240e+04	2.958e+04	1.253e+05
45	5.131e+04	1.174e+05	4.849e+05	1.650e+04	3.829e+04	1.578e+05	1.245e+04	2.969e+04	1.258e+05
46	5.152e+04	1.178e+05	4.868e+05	1.657e+04	3.843e+04	1.583e+05	1.249e+04	2.981e+04	1.263e+05
47	5.173e+04	1.183e+05	4.886e+05	1.664e+04	3.859e+04	1.589e+05	1.254e+04	2.992e+04	1.268e+05
48	5.195e+04	1.187e+05	4.907e+05	1.671e+04	3.875e+04	1.595e+05	1.259e+04	3.005e+04	1.273e+05
49	5.217e+04	1.192e+05	4.929e+05	1.678e+04	3.892e+04	1.602e+05	1.265e+04	3.019e+04	1.279e+05
50	5.239e+04	1.197e+05	4.951e+05	1.686e+04	3.909e+04	1.608e+05	1.270e+04	3.033e+04	1.285e+05
51	5.261e+04	1.202e+05	4.971e+05	1.693e+04	3.926e+04	1.614e+05	1.276e+04	3.046e+04	1.291e+05
52	5.283e+04	1.208e+05	4.991e+05	1.700e+04	3.943e+04	1.621e+05	1.281e+04	3.059e+04	1.297e+05
53	5.305e+04	1.214e+05	5.010e+05	1.707e+04	3.961e+04	1.629e+05	1.286e+04	3.073e+04	1.303e+05
54	5.328e+04	1.220e+05	5.029e+05	1.714e+04	3.978e+04	1.636e+05	1.291e+04	3.087e+04	1.308e+05
55	5.350e+04	1.226e+05	5.048e+05	1.721e+04	3.995e+04	1.643e+05	1.296e+04	3.100e+04	1.314e+05
56	5.371e+04	1.231e+05	5.064e+05	1.728e+04	4.011e+04	1.650e+05	1.301e+04	3.113e+04	1.319e+05
57	5.392e+04	1.236e+05	5.080e+05	1.734e+04	4.027e+04	1.656e+05	1.306e+04	3.126e+04	1.324e+05
58	5.413e+04	1.241e+05	5.094e+05	1.741e+04	4.043e+04	1.663e+05	1.311e+04	3.138e+04	1.329e+05
59	5.433e+04	1.246e+05	5.109e+05	1.747e+04	4.058e+04	1.669e+05	1.315e+04	3.150e+04	1.334e+05
60	5.453e+04	1.250e+05	5.125e+05	1.754e+04	4.073e+04	1.675e+05	1.320e+04	3.161e+04	1.338e+05
61	5.472e+04	1.254e+05	5.139e+05	1.760e+04	4.087e+04	1.682e+05	1.324e+04	3.172e+04	1.343e+05
62	5.491e+04	1.258e+05	5.154e+05	1.766e+04	4.101e+04	1.688e+05	1.328e+04	3.183e+04	1.347e+05
63	5.510e+04	1.262e+05	5.169e+05	1.772e+04	4.116e+04	1.694e+05	1.332e+04	3.194e+04	1.351e+05
64	5.529e+04	1.267e+05	5.185e+05	1.778e+04	4.129e+04	1.699e+05	1.336e+04	3.204e+04	1.355e+05
65	5.547e+04	1.271e+05	5.201e+05	1.783e+04	4.142e+04	1.704e+05	1.340e+04	3.214e+04	1.359e+05
66	5.565e+04	1.275e+05	5.217e+05	1.789e+04	4.155e+04	1.710e+05	1.344e+04	3.224e+04	1.362e+05
67	5.584e+04	1.278e+05	5.233e+05	1.795e+04	4.168e+04	1.714e+05	1.348e+04	3.234e+04	1.366e+05
68	5.602e+04	1.283e+05	5.249e+05	1.800e+04	4.180e+04	1.719e+05	1.352e+04	3.243e+04	1.370e+05
69	5.619e+04	1.287e+05	5.266e+05	1.805e+04	4.193e+04	1.723e+05	1.355e+04	3.253e+04	1.373e+05
70	5.637e+04	1.291e+05	5.283e+05	1.811e+04	4.205e+04	1.727e+05	1.359e+04	3.262e+04	1.377e+05
71	5.654e+04	1.295e+05	5.299e+05	1.816e+04	4.217e+04	1.731e+05	1.362e+04	3.271e+04	1.380e+05
72	5.672e+04	1.299e+05	5.314e+05	1.821e+04	4.229e+04	1.735e+05	1.366e+04	3.279e+04	1.384e+05
73	5.690e+04	1.303e+05	5.330e+05	1.826e+04	4.241e+04	1.739e+05	1.369e+04	3.287e+04	1.388e+05
74	5.708e+04	1.307e+05	5.346e+05	1.831e+04	4.252e+04	1.743e+05	1.373e+04	3.295e+04	1.392e+05
75	5.725e+04	1.311e+05	5.361e+05	1.835e+04	4.263e+04	1.746e+05	1.376e+04	3.303e+04	1.396e+05
76	5.743e+04	1.315e+05	5.376e+05	1.840e+04	4.275e+04	1.750e+05	1.380e+04	3.310e+04	1.400e+05
77	5.761e+04	1.319e+05	5.391e+05	1.845e+04	4.286e+04	1.754e+05	1.383e+04	3.318e+04	1.404e+05
78	5.780e+04	1.322e+05	5.406e+05	1.850e+04	4.297e+04	1.757e+05	1.387e+04	3.325e+04	1.408e+05
79	5.798e+04	1.326e+05	5.420e+05	1.854e+04	4.308e+04	1.761e+05	1.390e+04	3.332e+04	1.412e+05
80	5.816e+04	1.330e+05	5.433e+05	1.859e+04	4.320e+04	1.765e+05	1.394e+04	3.339e+04	1.416e+05
81	5.834e+04	1.334e+05	5.448e+05	1.864e+04	4.331e+04	1.769e+05	1.397e+04	3.347e+04	1.420e+05
82	5.852e+04	1.338e+05	5.463e+05	1.869e+04	4.342e+04	1.773e+05	1.401e+04	3.355e+04	1.425e+05
83	5.870e+04	1.342e+05	5.477e+05	1.874e+04	4.354e+04	1.778e+05	1.404e+04	3.363e+04	1.429e+05
84	5.887e+04	1.345e+05	5.487e+05	1.879e+04	4.365e+04	1.782e+05	1.407e+04	3.371e+04	1.433e+05
85	5.902e+04	1.348e+05	5.493e+05	1.883e+04	4.375e+04	1.787e+05	1.410e+04	3.379e+04	1.436e+05
86	5.917e+04	1.351e+05	5.497e+05	1.888e+04	4.387e+04	1.792e+05	1.414e+04	3.388e+04	1.440e+05
87	5.932e+04	1.354e+05	5.499e+05	1.892e+04	4.397e+04	1.797e+05	1.417e+04	3.397e+04	1.444e+05
88	5.945e+04	1.357e+05	5.500e+05	1.896e+04	4.407e+04	1.802e+05	1.419e+04	3.404e+04	1.447e+05
89	5.958e+04	1.360e+05	5.499e+05	1.900e+04	4.416e+04	1.805e+05	1.422e+04	3.411e+04	1.451e+05
90	5.971e+04	1.362e+05	5.496e+05	1.903e+04	4.423e+04	1.809e+05	1.424e+04	3.418e+04	1.454e+05
91	5.982e+04	1.365e+05	5.492e+05	1.906e+04	4.431e+04	1.812e+05	1.427e+04	3.424e+04	1.456e+05
92	5.994e+04	1.367e+05	5.486e+05	1.909e+04	4.438e+04	1.815e+05	1.429e+04	3.430e+04	1.459e+05
93	6.004e+04	1.369e+05	5.478e+05	1.911e+04	4.444e+04	1.818e+05	1.431e+04	3.435e+04	1.462e+05
94	6.015e+04	1.371e+05	5.469e+05	1.913e+04	4.450e+04	1.820e+05	1.432e+04	3.440e+04	1.464e+05
95	6.024e+04	1.372e+05	5.459e+05	1.915e+04	4.455e+04	1.822e+05	1.434e+04	3.444e+04	1.466e+05
96	6.033e+04	1.374e+05	5.446e+05	1.917e+04	4.460e+04	1.824e+05	1.435e+04	3.449e+04	1.468e+05
97	6.041e+04	1.375e+05	5.432e+05	1.918e+04	4.463e+04	1.826e+05	1.436e+04	3.452e+04	1.470e+05
98	6.048e+04	1.376e+05	5.417e+05	1.919e+04	4.466e+04	1.827e+05	1.437e+04	3.456e+04	1.471e+05
99	6.054e+04	1.377e+05	5.399e+05	1.920e+04	4.468e+04	1.827e+05	1.437e+04	3.458e+04	1.473e+05
100	6.060e+04	1.378e+05	5.381e+05	1.920e+04	4.470e+04	1.828e+05	1.438e+04	3.461e+04	1.474e+05
