# Supplementary material for: Evaluating the Potential of Younger Cases and Older Controls Cohorts to Improve Discovery Power in Genome-Wide Association Studies of Late-Onset Diseases
Source: MDPI journal article supplement (doi:10.3390/jpm9030038), 2019-07-22
Supplement: s2 [file s2 › SuppFiles/Results/LODsCommonLow/BreastCancer/CasesNeededYoungOldCohortStatisticalPower.csv]

age	X1	X2	X3	X4	X5	X6	X7	X8	X9
35	4.930e+04	1.143e+05	4.683e+05	1.591e+04	3.701e+04	1.525e+05	1.204e+04	2.873e+04	1.219e+05
36	4.925e+04	1.142e+05	4.678e+05	1.589e+04	3.697e+04	1.523e+05	1.202e+04	2.869e+04	1.217e+05
37	4.918e+04	1.141e+05	4.671e+05	1.587e+04	3.693e+04	1.521e+05	1.201e+04	2.866e+04	1.216e+05
38	4.911e+04	1.139e+05	4.664e+05	1.585e+04	3.687e+04	1.519e+05	1.199e+04	2.861e+04	1.214e+05
39	4.902e+04	1.137e+05	4.655e+05	1.582e+04	3.681e+04	1.517e+05	1.197e+04	2.856e+04	1.212e+05
40	4.892e+04	1.134e+05	4.646e+05	1.579e+04	3.673e+04	1.514e+05	1.194e+04	2.851e+04	1.210e+05
41	4.881e+04	1.132e+05	4.635e+05	1.575e+04	3.665e+04	1.510e+05	1.192e+04	2.845e+04	1.207e+05
42	4.869e+04	1.129e+05	4.624e+05	1.571e+04	3.656e+04	1.507e+05	1.189e+04	2.838e+04	1.204e+05
43	4.856e+04	1.126e+05	4.612e+05	1.567e+04	3.647e+04	1.503e+05	1.186e+04	2.831e+04	1.201e+05
44	4.842e+04	1.123e+05	4.598e+05	1.563e+04	3.637e+04	1.499e+05	1.182e+04	2.823e+04	1.197e+05
45	4.827e+04	1.119e+05	4.584e+05	1.558e+04	3.625e+04	1.494e+05	1.179e+04	2.814e+04	1.194e+05
46	4.811e+04	1.116e+05	4.569e+05	1.553e+04	3.613e+04	1.489e+05	1.175e+04	2.805e+04	1.190e+05
47	4.793e+04	1.112e+05	4.553e+05	1.547e+04	3.601e+04	1.484e+05	1.171e+04	2.795e+04	1.186e+05
48	4.775e+04	1.107e+05	4.536e+05	1.542e+04	3.588e+04	1.479e+05	1.167e+04	2.785e+04	1.181e+05
49	4.756e+04	1.103e+05	4.518e+05	1.535e+04	3.573e+04	1.473e+05	1.162e+04	2.774e+04	1.177e+05
50	4.735e+04	1.098e+05	4.499e+05	1.529e+04	3.558e+04	1.467e+05	1.157e+04	2.762e+04	1.172e+05
51	4.714e+04	1.093e+05	4.479e+05	1.522e+04	3.543e+04	1.460e+05	1.152e+04	2.751e+04	1.167e+05
52	4.692e+04	1.088e+05	4.459e+05	1.515e+04	3.527e+04	1.453e+05	1.147e+04	2.738e+04	1.162e+05
53	4.669e+04	1.083e+05	4.437e+05	1.508e+04	3.509e+04	1.446e+05	1.142e+04	2.725e+04	1.156e+05
54	4.645e+04	1.078e+05	4.414e+05	1.500e+04	3.492e+04	1.439e+05	1.136e+04	2.711e+04	1.150e+05
55	4.622e+04	1.072e+05	4.392e+05	1.493e+04	3.474e+04	1.432e+05	1.130e+04	2.698e+04	1.145e+05
56	4.598e+04	1.067e+05	4.370e+05	1.485e+04	3.457e+04	1.425e+05	1.125e+04	2.684e+04	1.139e+05
57	4.573e+04	1.061e+05	4.347e+05	1.477e+04	3.438e+04	1.417e+05	1.119e+04	2.670e+04	1.133e+05
58	4.547e+04	1.055e+05	4.324e+05	1.469e+04	3.420e+04	1.409e+05	1.113e+04	2.656e+04	1.127e+05
59	4.523e+04	1.049e+05	4.301e+05	1.461e+04	3.401e+04	1.402e+05	1.107e+04	2.641e+04	1.121e+05
60	4.498e+04	1.044e+05	4.277e+05	1.453e+04	3.383e+04	1.394e+05	1.101e+04	2.627e+04	1.115e+05
61	4.473e+04	1.038e+05	4.254e+05	1.445e+04	3.364e+04	1.386e+05	1.095e+04	2.613e+04	1.109e+05
62	4.447e+04	1.032e+05	4.230e+05	1.437e+04	3.345e+04	1.379e+05	1.089e+04	2.598e+04	1.102e+05
63	4.422e+04	1.026e+05	4.207e+05	1.429e+04	3.326e+04	1.371e+05	1.083e+04	2.584e+04	1.096e+05
64	4.397e+04	1.020e+05	4.183e+05	1.421e+04	3.308e+04	1.363e+05	1.077e+04	2.570e+04	1.090e+05
65	4.372e+04	1.014e+05	4.159e+05	1.413e+04	3.289e+04	1.356e+05	1.071e+04	2.555e+04	1.084e+05
66	4.347e+04	1.009e+05	4.136e+05	1.405e+04	3.270e+04	1.348e+05	1.065e+04	2.541e+04	1.078e+05
67	4.322e+04	1.003e+05	4.113e+05	1.397e+04	3.252e+04	1.340e+05	1.059e+04	2.527e+04	1.072e+05
68	4.298e+04	9.971e+04	4.089e+05	1.389e+04	3.233e+04	1.333e+05	1.053e+04	2.512e+04	1.066e+05
69	4.273e+04	9.913e+04	4.066e+05	1.381e+04	3.214e+04	1.325e+05	1.047e+04	2.498e+04	1.060e+05
70	4.248e+04	9.854e+04	4.042e+05	1.373e+04	3.196e+04	1.317e+05	1.041e+04	2.484e+04	1.054e+05
71	4.223e+04	9.797e+04	4.019e+05	1.365e+04	3.177e+04	1.310e+05	1.035e+04	2.470e+04	1.048e+05
72	4.199e+04	9.740e+04	3.996e+05	1.357e+04	3.159e+04	1.302e+05	1.029e+04	2.455e+04	1.042e+05
73	4.174e+04	9.683e+04	3.972e+05	1.350e+04	3.140e+04	1.294e+05	1.023e+04	2.441e+04	1.036e+05
74	4.149e+04	9.625e+04	3.949e+05	1.342e+04	3.122e+04	1.286e+05	1.017e+04	2.427e+04	1.029e+05
75	4.125e+04	9.568e+04	3.925e+05	1.334e+04	3.103e+04	1.279e+05	1.011e+04	2.413e+04	1.023e+05
76	4.101e+04	9.513e+04	3.902e+05	1.326e+04	3.085e+04	1.271e+05	1.005e+04	2.399e+04	1.017e+05
77	4.076e+04	9.457e+04	3.878e+05	1.318e+04	3.067e+04	1.264e+05	9.991e+03	2.384e+04	1.011e+05
78	4.052e+04	9.402e+04	3.855e+05	1.310e+04	3.049e+04	1.256e+05	9.932e+03	2.370e+04	1.005e+05
79	4.028e+04	9.346e+04	3.832e+05	1.302e+04	3.031e+04	1.249e+05	9.873e+03	2.356e+04	9.993e+04
80	4.004e+04	9.292e+04	3.809e+05	1.295e+04	3.013e+04	1.241e+05	9.815e+03	2.342e+04	9.935e+04
81	3.980e+04	9.237e+04	3.786e+05	1.287e+04	2.995e+04	1.234e+05	9.758e+03	2.329e+04	9.875e+04
82	3.957e+04	9.183e+04	3.763e+05	1.279e+04	2.978e+04	1.227e+05	9.700e+03	2.315e+04	9.818e+04
83	3.933e+04	9.130e+04	3.740e+05	1.272e+04	2.960e+04	1.220e+05	9.644e+03	2.301e+04	9.759e+04
84	3.909e+04	9.075e+04	3.717e+05	1.264e+04	2.943e+04	1.212e+05	9.588e+03	2.287e+04	9.702e+04
85	3.886e+04	9.022e+04	3.695e+05	1.257e+04	2.926e+04	1.205e+05	9.531e+03	2.274e+04	9.645e+04
86	3.863e+04	8.969e+04	3.673e+05	1.249e+04	2.909e+04	1.198e+05	9.476e+03	2.261e+04	9.590e+04
87	3.841e+04	8.917e+04	3.651e+05	1.242e+04	2.891e+04	1.191e+05	9.421e+03	2.248e+04	9.535e+04
88	3.818e+04	8.865e+04	3.629e+05	1.235e+04	2.875e+04	1.185e+05	9.367e+03	2.235e+04	9.479e+04
89	3.796e+04	8.812e+04	3.608e+05	1.228e+04	2.858e+04	1.178e+05	9.313e+03	2.221e+04	9.424e+04
90	3.774e+04	8.760e+04	3.587e+05	1.220e+04	2.842e+04	1.171e+05	9.259e+03	2.209e+04	9.369e+04
91	3.751e+04	8.709e+04	3.566e+05	1.213e+04	2.825e+04	1.164e+05	9.206e+03	2.196e+04	9.315e+04
92	3.729e+04	8.658e+04	3.546e+05	1.206e+04	2.809e+04	1.157e+05	9.153e+03	2.183e+04	9.261e+04
93	3.708e+04	8.607e+04	3.526e+05	1.199e+04	2.793e+04	1.151e+05	9.100e+03	2.170e+04	9.206e+04
94	3.686e+04	8.556e+04	3.506e+05	1.193e+04	2.777e+04	1.144e+05	9.048e+03	2.158e+04	9.152e+04
95	3.665e+04	8.505e+04	3.486e+05	1.186e+04	2.761e+04	1.138e+05	8.997e+03	2.145e+04	9.100e+04
96	3.644e+04	8.456e+04	3.467e+05	1.179e+04	2.745e+04	1.131e+05	8.945e+03	2.133e+04	9.046e+04
97	3.623e+04	8.406e+04	3.448e+05	1.172e+04	2.730e+04	1.125e+05	8.894e+03	2.120e+04	8.994e+04
98	3.602e+04	8.356e+04	3.430e+05	1.166e+04	2.714e+04	1.119e+05	8.843e+03	2.108e+04	8.942e+04
99	3.581e+04	8.306e+04	3.411e+05	1.159e+04	2.699e+04	1.112e+05	8.793e+03	2.095e+04	8.890e+04
100	3.561e+04	8.257e+04	3.393e+05	1.153e+04	2.684e+04	1.106e+05	8.744e+03	2.083e+04	8.838e+04
