# Supplementary material for: Evaluating the Potential of Younger Cases and Older Controls Cohorts to Improve Discovery Power in Genome-Wide Association Studies of Late-Onset Diseases
Source: MDPI journal article supplement (doi:10.3390/jpm9030038), 2019-07-22
Supplement: s2 [file s2 › SuppFiles/Results/LODsCommonLow/CAD/CasesMultipleSameAgeCohortStatisticalPower.csv]

age	X1	X2	X3	X4	X5	X6	X7	X8	X9
47	1.000e+00	1.000e+00	1.000e+00	1.000e+00	1.000e+00	1.000e+00	1.000e+00	1.000e+00	1.000e+00
48	1.017e+00	1.019e+00	1.016e+00	1.017e+00	1.018e+00	1.015e+00	1.017e+00	1.018e+00	1.016e+00
49	1.034e+00	1.039e+00	1.033e+00	1.035e+00	1.037e+00	1.032e+00	1.035e+00	1.037e+00	1.032e+00
50	1.052e+00	1.059e+00	1.050e+00	1.053e+00	1.056e+00	1.048e+00	1.053e+00	1.055e+00	1.050e+00
51	1.071e+00	1.080e+00	1.068e+00	1.072e+00	1.076e+00	1.065e+00	1.072e+00	1.075e+00	1.067e+00
52	1.090e+00	1.102e+00	1.086e+00	1.092e+00	1.097e+00	1.083e+00	1.091e+00	1.095e+00	1.085e+00
53	1.110e+00	1.124e+00	1.106e+00	1.112e+00	1.118e+00	1.101e+00	1.111e+00	1.115e+00	1.104e+00
54	1.130e+00	1.146e+00	1.126e+00	1.132e+00	1.139e+00	1.120e+00	1.131e+00	1.136e+00	1.123e+00
55	1.151e+00	1.170e+00	1.147e+00	1.154e+00	1.161e+00	1.140e+00	1.152e+00	1.157e+00	1.143e+00
56	1.173e+00	1.194e+00	1.168e+00	1.176e+00	1.184e+00	1.161e+00	1.173e+00	1.180e+00	1.164e+00
57	1.195e+00	1.219e+00	1.190e+00	1.198e+00	1.207e+00	1.182e+00	1.195e+00	1.202e+00	1.185e+00
58	1.218e+00	1.245e+00	1.214e+00	1.221e+00	1.231e+00	1.204e+00	1.217e+00	1.225e+00	1.207e+00
59	1.243e+00	1.272e+00	1.239e+00	1.246e+00	1.257e+00	1.227e+00	1.241e+00	1.249e+00	1.230e+00
60	1.268e+00	1.299e+00	1.264e+00	1.270e+00	1.282e+00	1.250e+00	1.265e+00	1.273e+00	1.254e+00
61	1.294e+00	1.326e+00	1.290e+00	1.296e+00	1.307e+00	1.275e+00	1.289e+00	1.298e+00	1.277e+00
62	1.320e+00	1.354e+00	1.315e+00	1.323e+00	1.334e+00	1.300e+00	1.314e+00	1.323e+00	1.302e+00
63	1.347e+00	1.383e+00	1.342e+00	1.350e+00	1.360e+00	1.327e+00	1.340e+00	1.349e+00	1.327e+00
64	1.375e+00	1.412e+00	1.368e+00	1.377e+00	1.387e+00	1.353e+00	1.366e+00	1.375e+00	1.352e+00
65	1.402e+00	1.440e+00	1.395e+00	1.405e+00	1.413e+00	1.379e+00	1.392e+00	1.401e+00	1.378e+00
66	1.430e+00	1.470e+00	1.422e+00	1.433e+00	1.440e+00	1.405e+00	1.419e+00	1.428e+00	1.403e+00
67	1.459e+00	1.499e+00	1.449e+00	1.461e+00	1.467e+00	1.432e+00	1.446e+00	1.454e+00	1.429e+00
68	1.487e+00	1.527e+00	1.476e+00	1.489e+00	1.494e+00	1.458e+00	1.472e+00	1.481e+00	1.454e+00
69	1.516e+00	1.556e+00	1.504e+00	1.517e+00	1.520e+00	1.485e+00	1.500e+00	1.508e+00	1.480e+00
70	1.544e+00	1.584e+00	1.531e+00	1.545e+00	1.547e+00	1.511e+00	1.527e+00	1.536e+00	1.506e+00
71	1.573e+00	1.612e+00	1.559e+00	1.573e+00	1.573e+00	1.538e+00	1.553e+00	1.562e+00	1.532e+00
72	1.602e+00	1.639e+00	1.586e+00	1.600e+00	1.599e+00	1.565e+00	1.580e+00	1.589e+00	1.557e+00
73	1.630e+00	1.667e+00	1.613e+00	1.628e+00	1.625e+00	1.591e+00	1.607e+00	1.616e+00	1.583e+00
74	1.658e+00	1.693e+00	1.639e+00	1.654e+00	1.651e+00	1.617e+00	1.632e+00	1.642e+00	1.608e+00
75	1.686e+00	1.720e+00	1.665e+00	1.680e+00	1.677e+00	1.643e+00	1.658e+00	1.668e+00	1.634e+00
76	1.713e+00	1.746e+00	1.691e+00	1.706e+00	1.702e+00	1.668e+00	1.683e+00	1.693e+00	1.659e+00
77	1.739e+00	1.771e+00	1.716e+00	1.731e+00	1.727e+00	1.692e+00	1.707e+00	1.717e+00	1.684e+00
78	1.764e+00	1.794e+00	1.739e+00	1.755e+00	1.750e+00	1.715e+00	1.730e+00	1.740e+00	1.707e+00
79	1.789e+00	1.817e+00	1.762e+00	1.778e+00	1.773e+00	1.737e+00	1.752e+00	1.763e+00	1.730e+00
80	1.812e+00	1.839e+00	1.783e+00	1.800e+00	1.795e+00	1.758e+00	1.773e+00	1.784e+00	1.752e+00
81	1.834e+00	1.860e+00	1.804e+00	1.821e+00	1.816e+00	1.777e+00	1.793e+00	1.805e+00	1.772e+00
82	1.855e+00	1.880e+00	1.824e+00	1.842e+00	1.835e+00	1.795e+00	1.812e+00	1.824e+00	1.792e+00
83	1.875e+00	1.899e+00	1.843e+00	1.861e+00	1.854e+00	1.812e+00	1.830e+00	1.843e+00	1.810e+00
84	1.893e+00	1.917e+00	1.860e+00	1.879e+00	1.871e+00	1.828e+00	1.847e+00	1.859e+00	1.826e+00
85	1.910e+00	1.933e+00	1.876e+00	1.896e+00	1.887e+00	1.842e+00	1.862e+00	1.875e+00	1.841e+00
86	1.927e+00	1.948e+00	1.891e+00	1.912e+00	1.902e+00	1.855e+00	1.877e+00	1.890e+00	1.855e+00
87	1.941e+00	1.961e+00	1.904e+00	1.926e+00	1.914e+00	1.866e+00	1.890e+00	1.902e+00	1.867e+00
88	1.953e+00	1.974e+00	1.913e+00	1.938e+00	1.925e+00	1.876e+00	1.900e+00	1.912e+00	1.878e+00
89	1.963e+00	1.985e+00	1.920e+00	1.948e+00	1.935e+00	1.884e+00	1.910e+00	1.921e+00	1.887e+00
90	1.972e+00	1.995e+00	1.924e+00	1.957e+00	1.942e+00	1.891e+00	1.916e+00	1.928e+00	1.893e+00
91	1.976e+00	2.001e+00	1.926e+00	1.961e+00	1.946e+00	1.894e+00	1.920e+00	1.932e+00	1.895e+00
92	1.977e+00	2.004e+00	1.925e+00	1.963e+00	1.947e+00	1.894e+00	1.920e+00	1.933e+00	1.894e+00
93	1.975e+00	2.004e+00	1.921e+00	1.961e+00	1.946e+00	1.893e+00	1.919e+00	1.931e+00	1.891e+00
94	1.971e+00	2.002e+00	1.915e+00	1.957e+00	1.942e+00	1.889e+00	1.914e+00	1.927e+00	1.884e+00
95	1.963e+00	1.997e+00	1.906e+00	1.950e+00	1.935e+00	1.882e+00	1.907e+00	1.921e+00	1.874e+00
96	1.953e+00	1.990e+00	1.894e+00	1.940e+00	1.926e+00	1.874e+00	1.898e+00	1.912e+00	1.862e+00
97	1.940e+00	1.980e+00	1.881e+00	1.928e+00	1.914e+00	1.863e+00	1.886e+00	1.901e+00	1.846e+00
98	1.924e+00	1.968e+00	1.865e+00	1.913e+00	1.900e+00	1.849e+00	1.872e+00	1.887e+00	1.828e+00
99	1.905e+00	1.953e+00	1.846e+00	1.895e+00	1.883e+00	1.834e+00	1.855e+00	1.871e+00	1.808e+00
100	1.884e+00	1.936e+00	1.826e+00	1.875e+00	1.864e+00	1.816e+00	1.836e+00	1.853e+00	1.785e+00
