# Supplementary material for: Evaluating the Potential of Younger Cases and Older Controls Cohorts to Improve Discovery Power in Genome-Wide Association Studies of Late-Onset Diseases
Source: MDPI journal article supplement (doi:10.3390/jpm9030038), 2019-07-22
Supplement: s2 [file s2 › SuppFiles/Results/LODsCommonLow/CAD/CasesMultipleYoungOldCohortStatisticalPower.csv]

age	X1	X2	X3	X4	X5	X6	X7	X8	X9
47	1.000e+00	1.000e+00	1.000e+00	1.000e+00	1.000e+00	1.000e+00	1.000e+00	1.000e+00	1.000e+00
48	9.987e-01	9.987e-01	9.987e-01	9.986e-01	9.986e-01	9.985e-01	9.987e-01	9.987e-01	9.987e-01
49	9.968e-01	9.969e-01	9.969e-01	9.969e-01	9.968e-01	9.967e-01	9.970e-01	9.970e-01	9.969e-01
50	9.946e-01	9.947e-01	9.947e-01	9.947e-01	9.946e-01	9.944e-01	9.949e-01	9.948e-01	9.947e-01
51	9.919e-01	9.921e-01	9.921e-01	9.921e-01	9.920e-01	9.917e-01	9.923e-01	9.922e-01	9.922e-01
52	9.889e-01	9.891e-01	9.891e-01	9.891e-01	9.890e-01	9.886e-01	9.893e-01	9.892e-01	9.891e-01
53	9.854e-01	9.857e-01	9.857e-01	9.856e-01	9.856e-01	9.852e-01	9.859e-01	9.858e-01	9.857e-01
54	9.815e-01	9.819e-01	9.819e-01	9.818e-01	9.818e-01	9.813e-01	9.822e-01	9.821e-01	9.819e-01
55	9.772e-01	9.777e-01	9.776e-01	9.776e-01	9.776e-01	9.770e-01	9.779e-01	9.779e-01	9.777e-01
56	9.725e-01	9.730e-01	9.730e-01	9.729e-01	9.730e-01	9.724e-01	9.733e-01	9.733e-01	9.730e-01
57	9.674e-01	9.680e-01	9.679e-01	9.679e-01	9.680e-01	9.673e-01	9.684e-01	9.682e-01	9.679e-01
58	9.619e-01	9.627e-01	9.626e-01	9.626e-01	9.626e-01	9.620e-01	9.630e-01	9.629e-01	9.625e-01
59	9.563e-01	9.570e-01	9.570e-01	9.569e-01	9.570e-01	9.564e-01	9.573e-01	9.574e-01	9.569e-01
60	9.500e-01	9.510e-01	9.508e-01	9.508e-01	9.510e-01	9.503e-01	9.513e-01	9.513e-01	9.507e-01
61	9.434e-01	9.445e-01	9.443e-01	9.443e-01	9.445e-01	9.437e-01	9.448e-01	9.448e-01	9.441e-01
62	9.365e-01	9.377e-01	9.375e-01	9.376e-01	9.377e-01	9.369e-01	9.380e-01	9.381e-01	9.372e-01
63	9.292e-01	9.305e-01	9.303e-01	9.303e-01	9.306e-01	9.296e-01	9.308e-01	9.309e-01	9.299e-01
64	9.213e-01	9.227e-01	9.224e-01	9.226e-01	9.227e-01	9.217e-01	9.229e-01	9.231e-01	9.220e-01
65	9.129e-01	9.144e-01	9.141e-01	9.142e-01	9.144e-01	9.133e-01	9.146e-01	9.148e-01	9.136e-01
66	9.043e-01	9.058e-01	9.054e-01	9.056e-01	9.058e-01	9.046e-01	9.060e-01	9.062e-01	9.048e-01
67	8.951e-01	8.967e-01	8.962e-01	8.966e-01	8.967e-01	8.953e-01	8.970e-01	8.971e-01	8.956e-01
68	8.855e-01	8.871e-01	8.866e-01	8.869e-01	8.871e-01	8.856e-01	8.874e-01	8.875e-01	8.859e-01
69	8.755e-01	8.772e-01	8.765e-01	8.770e-01	8.772e-01	8.756e-01	8.774e-01	8.776e-01	8.757e-01
70	8.650e-01	8.667e-01	8.661e-01	8.665e-01	8.667e-01	8.651e-01	8.670e-01	8.672e-01	8.651e-01
71	8.543e-01	8.560e-01	8.552e-01	8.557e-01	8.559e-01	8.542e-01	8.562e-01	8.564e-01	8.543e-01
72	8.431e-01	8.449e-01	8.440e-01	8.445e-01	8.448e-01	8.429e-01	8.451e-01	8.453e-01	8.430e-01
73	8.317e-01	8.335e-01	8.326e-01	8.331e-01	8.333e-01	8.315e-01	8.337e-01	8.339e-01	8.315e-01
74	8.199e-01	8.217e-01	8.208e-01	8.213e-01	8.214e-01	8.196e-01	8.219e-01	8.221e-01	8.195e-01
75	8.079e-01	8.097e-01	8.087e-01	8.092e-01	8.093e-01	8.076e-01	8.098e-01	8.099e-01	8.074e-01
76	7.957e-01	7.974e-01	7.965e-01	7.968e-01	7.970e-01	7.953e-01	7.975e-01	7.976e-01	7.950e-01
77	7.833e-01	7.851e-01	7.840e-01	7.843e-01	7.845e-01	7.828e-01	7.850e-01	7.851e-01	7.826e-01
78	7.708e-01	7.725e-01	7.714e-01	7.717e-01	7.718e-01	7.702e-01	7.724e-01	7.725e-01	7.698e-01
79	7.580e-01	7.598e-01	7.585e-01	7.588e-01	7.589e-01	7.573e-01	7.595e-01	7.595e-01	7.570e-01
80	7.453e-01	7.470e-01	7.457e-01	7.459e-01	7.460e-01	7.444e-01	7.466e-01	7.467e-01	7.441e-01
81	7.324e-01	7.342e-01	7.328e-01	7.331e-01	7.331e-01	7.315e-01	7.338e-01	7.337e-01	7.312e-01
82	7.195e-01	7.212e-01	7.197e-01	7.201e-01	7.200e-01	7.183e-01	7.208e-01	7.206e-01	7.182e-01
83	7.067e-01	7.084e-01	7.067e-01	7.072e-01	7.070e-01	7.053e-01	7.078e-01	7.076e-01	7.052e-01
84	6.940e-01	6.957e-01	6.938e-01	6.945e-01	6.943e-01	6.924e-01	6.950e-01	6.948e-01	6.924e-01
85	6.815e-01	6.832e-01	6.810e-01	6.819e-01	6.817e-01	6.797e-01	6.823e-01	6.821e-01	6.796e-01
86	6.690e-01	6.706e-01	6.683e-01	6.694e-01	6.690e-01	6.669e-01	6.697e-01	6.695e-01	6.670e-01
87	6.568e-01	6.585e-01	6.557e-01	6.571e-01	6.567e-01	6.544e-01	6.573e-01	6.571e-01	6.545e-01
88	6.448e-01	6.466e-01	6.433e-01	6.451e-01	6.447e-01	6.423e-01	6.451e-01	6.449e-01	6.423e-01
89	6.330e-01	6.350e-01	6.309e-01	6.333e-01	6.328e-01	6.304e-01	6.331e-01	6.329e-01	6.303e-01
90	6.214e-01	6.235e-01	6.188e-01	6.216e-01	6.212e-01	6.187e-01	6.213e-01	6.211e-01	6.185e-01
91	6.100e-01	6.124e-01	6.069e-01	6.102e-01	6.099e-01	6.071e-01	6.096e-01	6.094e-01	6.068e-01
92	5.988e-01	6.015e-01	5.952e-01	5.989e-01	5.988e-01	5.959e-01	5.983e-01	5.981e-01	5.953e-01
93	5.877e-01	5.907e-01	5.837e-01	5.878e-01	5.879e-01	5.849e-01	5.870e-01	5.869e-01	5.839e-01
94	5.769e-01	5.803e-01	5.724e-01	5.769e-01	5.772e-01	5.740e-01	5.760e-01	5.759e-01	5.727e-01
95	5.663e-01	5.700e-01	5.612e-01	5.661e-01	5.667e-01	5.634e-01	5.651e-01	5.652e-01	5.617e-01
96	5.558e-01	5.598e-01	5.502e-01	5.556e-01	5.564e-01	5.529e-01	5.545e-01	5.545e-01	5.509e-01
97	5.455e-01	5.500e-01	5.395e-01	5.452e-01	5.463e-01	5.427e-01	5.441e-01	5.441e-01	5.402e-01
98	5.354e-01	5.403e-01	5.289e-01	5.350e-01	5.364e-01	5.326e-01	5.338e-01	5.340e-01	5.298e-01
99	5.255e-01	5.308e-01	5.185e-01	5.250e-01	5.267e-01	5.228e-01	5.237e-01	5.240e-01	5.194e-01
100	5.158e-01	5.214e-01	5.083e-01	5.152e-01	5.172e-01	5.131e-01	5.138e-01	5.141e-01	5.093e-01
