# Supplementary material for: Evaluating the Potential of Younger Cases and Older Controls Cohorts to Improve Discovery Power in Genome-Wide Association Studies of Late-Onset Diseases
Source: MDPI journal article supplement (doi:10.3390/jpm9030038), 2019-07-22
Supplement: s2 [file s2 › SuppFiles/Results/LODsCommonLow/CAD/CasesNeededCohortStatisticalPower.csv]

age	X1	X2	X3	X4	X5	X6	X7	X8	X9
47	6.342e+04	1.411e+05	5.913e+05	2.024e+04	4.663e+04	1.952e+05	1.523e+04	3.622e+04	1.558e+05
48	6.450e+04	1.438e+05	6.008e+05	2.059e+04	4.749e+04	1.983e+05	1.549e+04	3.688e+04	1.583e+05
49	6.560e+04	1.466e+05	6.106e+05	2.095e+04	4.836e+04	2.014e+05	1.576e+04	3.755e+04	1.609e+05
50	6.673e+04	1.495e+05	6.208e+05	2.132e+04	4.926e+04	2.046e+05	1.603e+04	3.823e+04	1.635e+05
51	6.791e+04	1.524e+05	6.314e+05	2.170e+04	5.019e+04	2.080e+05	1.632e+04	3.893e+04	1.663e+05
52	6.912e+04	1.555e+05	6.424e+05	2.210e+04	5.114e+04	2.115e+05	1.661e+04	3.966e+04	1.691e+05
53	7.037e+04	1.586e+05	6.538e+05	2.250e+04	5.212e+04	2.150e+05	1.691e+04	4.039e+04	1.720e+05
54	7.166e+04	1.618e+05	6.656e+05	2.292e+04	5.312e+04	2.188e+05	1.722e+04	4.115e+04	1.750e+05
55	7.301e+04	1.651e+05	6.779e+05	2.335e+04	5.415e+04	2.226e+05	1.753e+04	4.193e+04	1.781e+05
56	7.439e+04	1.685e+05	6.907e+05	2.379e+04	5.521e+04	2.266e+05	1.786e+04	4.273e+04	1.814e+05
57	7.580e+04	1.720e+05	7.039e+05	2.425e+04	5.630e+04	2.307e+05	1.819e+04	4.354e+04	1.847e+05
58	7.728e+04	1.757e+05	7.178e+05	2.472e+04	5.742e+04	2.350e+05	1.854e+04	4.438e+04	1.881e+05
59	7.884e+04	1.794e+05	7.326e+05	2.521e+04	5.859e+04	2.395e+05	1.889e+04	4.525e+04	1.917e+05
60	8.042e+04	1.833e+05	7.476e+05	2.571e+04	5.977e+04	2.441e+05	1.926e+04	4.612e+04	1.954e+05
61	8.204e+04	1.871e+05	7.625e+05	2.623e+04	6.096e+04	2.489e+05	1.963e+04	4.702e+04	1.991e+05
62	8.374e+04	1.911e+05	7.778e+05	2.677e+04	6.219e+04	2.539e+05	2.001e+04	4.793e+04	2.029e+05
63	8.546e+04	1.952e+05	7.933e+05	2.733e+04	6.343e+04	2.590e+05	2.041e+04	4.886e+04	2.068e+05
64	8.719e+04	1.992e+05	8.090e+05	2.787e+04	6.467e+04	2.641e+05	2.080e+04	4.980e+04	2.107e+05
65	8.894e+04	2.033e+05	8.247e+05	2.843e+04	6.591e+04	2.692e+05	2.120e+04	5.075e+04	2.147e+05
66	9.073e+04	2.074e+05	8.407e+05	2.900e+04	6.716e+04	2.744e+05	2.160e+04	5.171e+04	2.186e+05
67	9.251e+04	2.115e+05	8.568e+05	2.957e+04	6.841e+04	2.795e+05	2.201e+04	5.268e+04	2.226e+05
68	9.431e+04	2.155e+05	8.729e+05	3.014e+04	6.965e+04	2.847e+05	2.242e+04	5.365e+04	2.266e+05
69	9.614e+04	2.195e+05	8.893e+05	3.071e+04	7.089e+04	2.899e+05	2.283e+04	5.464e+04	2.307e+05
70	9.795e+04	2.235e+05	9.055e+05	3.127e+04	7.213e+04	2.951e+05	2.324e+04	5.562e+04	2.346e+05
71	9.977e+04	2.275e+05	9.216e+05	3.183e+04	7.335e+04	3.003e+05	2.365e+04	5.660e+04	2.387e+05
72	1.016e+05	2.314e+05	9.378e+05	3.239e+04	7.458e+04	3.055e+05	2.406e+04	5.758e+04	2.427e+05
73	1.034e+05	2.352e+05	9.537e+05	3.294e+04	7.580e+04	3.107e+05	2.446e+04	5.853e+04	2.466e+05
74	1.052e+05	2.390e+05	9.692e+05	3.348e+04	7.700e+04	3.157e+05	2.486e+04	5.947e+04	2.506e+05
75	1.069e+05	2.427e+05	9.848e+05	3.401e+04	7.820e+04	3.207e+05	2.524e+04	6.041e+04	2.546e+05
76	1.086e+05	2.464e+05	9.998e+05	3.453e+04	7.938e+04	3.256e+05	2.562e+04	6.131e+04	2.586e+05
77	1.103e+05	2.499e+05	1.014e+06	3.503e+04	8.052e+04	3.303e+05	2.599e+04	6.219e+04	2.623e+05
78	1.119e+05	2.532e+05	1.028e+06	3.552e+04	8.162e+04	3.348e+05	2.634e+04	6.303e+04	2.660e+05
79	1.134e+05	2.565e+05	1.042e+06	3.598e+04	8.269e+04	3.391e+05	2.667e+04	6.385e+04	2.696e+05
80	1.149e+05	2.596e+05	1.055e+06	3.643e+04	8.371e+04	3.431e+05	2.699e+04	6.463e+04	2.730e+05
81	1.163e+05	2.626e+05	1.067e+06	3.686e+04	8.467e+04	3.469e+05	2.730e+04	6.537e+04	2.762e+05
82	1.177e+05	2.654e+05	1.079e+06	3.728e+04	8.559e+04	3.505e+05	2.759e+04	6.608e+04	2.792e+05
83	1.189e+05	2.680e+05	1.090e+06	3.766e+04	8.645e+04	3.538e+05	2.787e+04	6.675e+04	2.820e+05
84	1.201e+05	2.705e+05	1.100e+06	3.803e+04	8.724e+04	3.568e+05	2.812e+04	6.735e+04	2.846e+05
85	1.212e+05	2.728e+05	1.109e+06	3.837e+04	8.799e+04	3.596e+05	2.836e+04	6.792e+04	2.869e+05
86	1.222e+05	2.749e+05	1.118e+06	3.869e+04	8.867e+04	3.621e+05	2.858e+04	6.845e+04	2.891e+05
87	1.231e+05	2.768e+05	1.126e+06	3.898e+04	8.926e+04	3.643e+05	2.878e+04	6.890e+04	2.910e+05
88	1.239e+05	2.786e+05	1.131e+06	3.922e+04	8.978e+04	3.662e+05	2.894e+04	6.928e+04	2.926e+05
89	1.245e+05	2.802e+05	1.135e+06	3.943e+04	9.023e+04	3.679e+05	2.908e+04	6.960e+04	2.940e+05
90	1.251e+05	2.815e+05	1.138e+06	3.960e+04	9.056e+04	3.691e+05	2.918e+04	6.984e+04	2.950e+05
91	1.253e+05	2.823e+05	1.139e+06	3.970e+04	9.075e+04	3.697e+05	2.923e+04	6.998e+04	2.953e+05
92	1.254e+05	2.828e+05	1.138e+06	3.972e+04	9.080e+04	3.698e+05	2.924e+04	7.001e+04	2.952e+05
93	1.253e+05	2.828e+05	1.136e+06	3.970e+04	9.074e+04	3.695e+05	2.921e+04	6.996e+04	2.946e+05
94	1.250e+05	2.826e+05	1.132e+06	3.961e+04	9.055e+04	3.688e+05	2.915e+04	6.982e+04	2.935e+05
95	1.245e+05	2.819e+05	1.127e+06	3.947e+04	9.024e+04	3.675e+05	2.904e+04	6.958e+04	2.920e+05
96	1.239e+05	2.808e+05	1.120e+06	3.927e+04	8.981e+04	3.658e+05	2.890e+04	6.926e+04	2.901e+05
97	1.230e+05	2.795e+05	1.112e+06	3.902e+04	8.926e+04	3.637e+05	2.872e+04	6.885e+04	2.877e+05
98	1.220e+05	2.777e+05	1.103e+06	3.871e+04	8.860e+04	3.611e+05	2.850e+04	6.835e+04	2.849e+05
99	1.208e+05	2.756e+05	1.092e+06	3.835e+04	8.782e+04	3.580e+05	2.824e+04	6.777e+04	2.817e+05
100	1.195e+05	2.732e+05	1.080e+06	3.794e+04	8.693e+04	3.546e+05	2.795e+04	6.711e+04	2.781e+05
