# Supplementary material for: Evaluating the Potential of Younger Cases and Older Controls Cohorts to Improve Discovery Power in Genome-Wide Association Studies of Late-Onset Diseases
Source: MDPI journal article supplement (doi:10.3390/jpm9030038), 2019-07-22
Supplement: s2 [file s2 › SuppFiles/Results/LODsCommonLow/CAD/CasesNeededYoungOldCohortStatisticalPower.csv]

age	X1	X2	X3	X4	X5	X6	X7	X8	X9
47	6.342e+04	1.411e+05	5.913e+05	2.024e+04	4.663e+04	1.952e+05	1.523e+04	3.622e+04	1.558e+05
48	6.334e+04	1.409e+05	5.905e+05	2.021e+04	4.657e+04	1.949e+05	1.521e+04	3.618e+04	1.556e+05
49	6.322e+04	1.407e+05	5.894e+05	2.018e+04	4.648e+04	1.946e+05	1.518e+04	3.611e+04	1.553e+05
50	6.308e+04	1.404e+05	5.881e+05	2.013e+04	4.638e+04	1.941e+05	1.515e+04	3.603e+04	1.550e+05
51	6.291e+04	1.400e+05	5.866e+05	2.008e+04	4.626e+04	1.936e+05	1.511e+04	3.594e+04	1.546e+05
52	6.272e+04	1.396e+05	5.848e+05	2.002e+04	4.612e+04	1.930e+05	1.506e+04	3.583e+04	1.541e+05
53	6.250e+04	1.391e+05	5.828e+05	1.995e+04	4.596e+04	1.923e+05	1.501e+04	3.571e+04	1.536e+05
54	6.225e+04	1.386e+05	5.806e+05	1.987e+04	4.578e+04	1.916e+05	1.495e+04	3.557e+04	1.530e+05
55	6.198e+04	1.380e+05	5.780e+05	1.978e+04	4.558e+04	1.907e+05	1.489e+04	3.542e+04	1.523e+05
56	6.168e+04	1.373e+05	5.753e+05	1.969e+04	4.537e+04	1.899e+05	1.482e+04	3.526e+04	1.516e+05
57	6.136e+04	1.366e+05	5.723e+05	1.959e+04	4.514e+04	1.889e+05	1.474e+04	3.507e+04	1.508e+05
58	6.101e+04	1.359e+05	5.692e+05	1.948e+04	4.489e+04	1.878e+05	1.466e+04	3.488e+04	1.500e+05
59	6.065e+04	1.351e+05	5.659e+05	1.937e+04	4.463e+04	1.867e+05	1.458e+04	3.468e+04	1.491e+05
60	6.025e+04	1.342e+05	5.622e+05	1.924e+04	4.435e+04	1.855e+05	1.448e+04	3.446e+04	1.481e+05
61	5.984e+04	1.333e+05	5.584e+05	1.911e+04	4.404e+04	1.843e+05	1.439e+04	3.422e+04	1.471e+05
62	5.940e+04	1.323e+05	5.543e+05	1.898e+04	4.373e+04	1.829e+05	1.428e+04	3.398e+04	1.460e+05
63	5.894e+04	1.313e+05	5.500e+05	1.883e+04	4.339e+04	1.815e+05	1.417e+04	3.372e+04	1.449e+05
64	5.844e+04	1.302e+05	5.454e+05	1.867e+04	4.303e+04	1.799e+05	1.405e+04	3.344e+04	1.437e+05
65	5.790e+04	1.290e+05	5.405e+05	1.850e+04	4.264e+04	1.783e+05	1.393e+04	3.314e+04	1.424e+05
66	5.735e+04	1.278e+05	5.353e+05	1.833e+04	4.224e+04	1.766e+05	1.380e+04	3.283e+04	1.410e+05
67	5.677e+04	1.265e+05	5.299e+05	1.815e+04	4.181e+04	1.748e+05	1.366e+04	3.250e+04	1.396e+05
68	5.616e+04	1.252e+05	5.242e+05	1.795e+04	4.137e+04	1.729e+05	1.351e+04	3.215e+04	1.380e+05
69	5.553e+04	1.238e+05	5.183e+05	1.775e+04	4.090e+04	1.709e+05	1.336e+04	3.179e+04	1.365e+05
70	5.486e+04	1.223e+05	5.121e+05	1.754e+04	4.042e+04	1.689e+05	1.320e+04	3.141e+04	1.348e+05
71	5.418e+04	1.208e+05	5.057e+05	1.732e+04	3.991e+04	1.668e+05	1.304e+04	3.102e+04	1.331e+05
72	5.347e+04	1.192e+05	4.991e+05	1.709e+04	3.939e+04	1.646e+05	1.287e+04	3.062e+04	1.314e+05
73	5.275e+04	1.176e+05	4.923e+05	1.686e+04	3.886e+04	1.623e+05	1.269e+04	3.021e+04	1.296e+05
74	5.200e+04	1.160e+05	4.853e+05	1.662e+04	3.830e+04	1.600e+05	1.251e+04	2.978e+04	1.277e+05
75	5.124e+04	1.143e+05	4.782e+05	1.638e+04	3.774e+04	1.577e+05	1.233e+04	2.934e+04	1.258e+05
76	5.046e+04	1.125e+05	4.709e+05	1.613e+04	3.716e+04	1.553e+05	1.214e+04	2.889e+04	1.239e+05
77	4.968e+04	1.108e+05	4.635e+05	1.587e+04	3.658e+04	1.528e+05	1.195e+04	2.844e+04	1.219e+05
78	4.889e+04	1.090e+05	4.561e+05	1.562e+04	3.599e+04	1.504e+05	1.176e+04	2.798e+04	1.200e+05
79	4.807e+04	1.072e+05	4.485e+05	1.536e+04	3.539e+04	1.479e+05	1.156e+04	2.751e+04	1.180e+05
80	4.727e+04	1.054e+05	4.409e+05	1.510e+04	3.479e+04	1.453e+05	1.137e+04	2.705e+04	1.160e+05
81	4.645e+04	1.036e+05	4.333e+05	1.484e+04	3.419e+04	1.428e+05	1.117e+04	2.658e+04	1.139e+05
82	4.563e+04	1.018e+05	4.255e+05	1.457e+04	3.358e+04	1.402e+05	1.097e+04	2.610e+04	1.119e+05
83	4.482e+04	9.997e+04	4.178e+05	1.431e+04	3.297e+04	1.377e+05	1.078e+04	2.563e+04	1.099e+05
84	4.402e+04	9.819e+04	4.102e+05	1.406e+04	3.238e+04	1.352e+05	1.058e+04	2.517e+04	1.079e+05
85	4.322e+04	9.642e+04	4.027e+05	1.380e+04	3.179e+04	1.327e+05	1.039e+04	2.471e+04	1.059e+05
86	4.243e+04	9.464e+04	3.951e+05	1.355e+04	3.120e+04	1.302e+05	1.020e+04	2.425e+04	1.039e+05
87	4.165e+04	9.293e+04	3.877e+05	1.330e+04	3.062e+04	1.278e+05	1.001e+04	2.380e+04	1.020e+05
88	4.090e+04	9.125e+04	3.804e+05	1.306e+04	3.006e+04	1.254e+05	9.823e+03	2.336e+04	1.001e+05
89	4.015e+04	8.961e+04	3.730e+05	1.282e+04	2.951e+04	1.231e+05	9.640e+03	2.292e+04	9.823e+04
90	3.941e+04	8.800e+04	3.659e+05	1.258e+04	2.897e+04	1.208e+05	9.459e+03	2.250e+04	9.638e+04
91	3.869e+04	8.643e+04	3.589e+05	1.235e+04	2.844e+04	1.185e+05	9.282e+03	2.208e+04	9.455e+04
92	3.798e+04	8.488e+04	3.519e+05	1.212e+04	2.792e+04	1.163e+05	9.109e+03	2.166e+04	9.276e+04
93	3.728e+04	8.337e+04	3.451e+05	1.190e+04	2.741e+04	1.142e+05	8.938e+03	2.126e+04	9.099e+04
94	3.659e+04	8.189e+04	3.384e+05	1.168e+04	2.691e+04	1.121e+05	8.770e+03	2.086e+04	8.925e+04
95	3.591e+04	8.044e+04	3.318e+05	1.146e+04	2.643e+04	1.100e+05	8.605e+03	2.047e+04	8.753e+04
96	3.525e+04	7.901e+04	3.254e+05	1.124e+04	2.594e+04	1.079e+05	8.443e+03	2.009e+04	8.584e+04
97	3.460e+04	7.762e+04	3.190e+05	1.103e+04	2.547e+04	1.059e+05	8.284e+03	1.971e+04	8.418e+04
98	3.396e+04	7.625e+04	3.127e+05	1.083e+04	2.501e+04	1.040e+05	8.128e+03	1.934e+04	8.255e+04
99	3.333e+04	7.490e+04	3.066e+05	1.063e+04	2.456e+04	1.021e+05	7.975e+03	1.898e+04	8.094e+04
100	3.271e+04	7.359e+04	3.005e+05	1.043e+04	2.412e+04	1.002e+05	7.824e+03	1.862e+04	7.936e+04
