# Supplementary material for: Evaluating the Potential of Younger Cases and Older Controls Cohorts to Improve Discovery Power in Genome-Wide Association Studies of Late-Onset Diseases
Source: MDPI journal article supplement (doi:10.3390/jpm9030038), 2019-07-22
Supplement: s2 [file s2 › SuppFiles/Results/LODsCommonLow/ColorectalCancer/CasesMultipleSameAgeCohortStatisticalPower.csv]

age	X1	X2	X3	X4	X5	X6	X7	X8	X9
50	1.000e+00	1.000e+00	1.000e+00	1.000e+00	1.000e+00	1.000e+00	1.000e+00	1.000e+00	1.000e+00
51	1.003e+00	1.002e+00	1.006e+00	1.003e+00	1.003e+00	1.008e+00	1.004e+00	1.003e+00	1.003e+00
52	1.007e+00	1.005e+00	1.013e+00	1.006e+00	1.006e+00	1.015e+00	1.007e+00	1.006e+00	1.006e+00
53	1.011e+00	1.008e+00	1.019e+00	1.010e+00	1.010e+00	1.023e+00	1.012e+00	1.009e+00	1.010e+00
54	1.015e+00	1.012e+00	1.025e+00	1.014e+00	1.014e+00	1.031e+00	1.016e+00	1.013e+00	1.014e+00
55	1.019e+00	1.015e+00	1.031e+00	1.018e+00	1.019e+00	1.040e+00	1.021e+00	1.017e+00	1.019e+00
56	1.023e+00	1.019e+00	1.038e+00	1.023e+00	1.024e+00	1.048e+00	1.026e+00	1.021e+00	1.024e+00
57	1.028e+00	1.023e+00	1.043e+00	1.028e+00	1.030e+00	1.056e+00	1.032e+00	1.026e+00	1.029e+00
58	1.033e+00	1.028e+00	1.049e+00	1.034e+00	1.036e+00	1.065e+00	1.038e+00	1.031e+00	1.035e+00
59	1.039e+00	1.033e+00	1.055e+00	1.040e+00	1.043e+00	1.073e+00	1.044e+00	1.036e+00	1.041e+00
60	1.044e+00	1.038e+00	1.061e+00	1.046e+00	1.050e+00	1.082e+00	1.050e+00	1.042e+00	1.048e+00
61	1.050e+00	1.044e+00	1.067e+00	1.053e+00	1.058e+00	1.091e+00	1.057e+00	1.048e+00	1.056e+00
62	1.056e+00	1.050e+00	1.072e+00	1.060e+00	1.066e+00	1.100e+00	1.064e+00	1.055e+00	1.063e+00
63	1.063e+00	1.057e+00	1.076e+00	1.068e+00	1.074e+00	1.108e+00	1.072e+00	1.061e+00	1.072e+00
64	1.071e+00	1.064e+00	1.080e+00	1.076e+00	1.084e+00	1.115e+00	1.081e+00	1.069e+00	1.080e+00
65	1.080e+00	1.072e+00	1.083e+00	1.084e+00	1.093e+00	1.123e+00	1.089e+00	1.077e+00	1.090e+00
66	1.088e+00	1.079e+00	1.088e+00	1.093e+00	1.103e+00	1.130e+00	1.098e+00	1.085e+00	1.099e+00
67	1.098e+00	1.087e+00	1.093e+00	1.101e+00	1.112e+00	1.138e+00	1.107e+00	1.093e+00	1.108e+00
68	1.108e+00	1.096e+00	1.098e+00	1.110e+00	1.121e+00	1.146e+00	1.116e+00	1.101e+00	1.118e+00
69	1.118e+00	1.105e+00	1.104e+00	1.119e+00	1.130e+00	1.155e+00	1.125e+00	1.110e+00	1.129e+00
70	1.129e+00	1.114e+00	1.111e+00	1.129e+00	1.140e+00	1.164e+00	1.135e+00	1.118e+00	1.139e+00
71	1.139e+00	1.124e+00	1.120e+00	1.138e+00	1.149e+00	1.173e+00	1.144e+00	1.127e+00	1.149e+00
72	1.150e+00	1.133e+00	1.129e+00	1.148e+00	1.158e+00	1.182e+00	1.154e+00	1.136e+00	1.159e+00
73	1.161e+00	1.144e+00	1.139e+00	1.157e+00	1.168e+00	1.191e+00	1.163e+00	1.145e+00	1.170e+00
74	1.172e+00	1.154e+00	1.151e+00	1.167e+00	1.177e+00	1.201e+00	1.173e+00	1.153e+00	1.180e+00
75	1.182e+00	1.165e+00	1.162e+00	1.177e+00	1.187e+00	1.210e+00	1.182e+00	1.162e+00	1.191e+00
76	1.192e+00	1.175e+00	1.173e+00	1.187e+00	1.197e+00	1.220e+00	1.192e+00	1.172e+00	1.200e+00
77	1.203e+00	1.186e+00	1.185e+00	1.196e+00	1.207e+00	1.229e+00	1.201e+00	1.181e+00	1.210e+00
78	1.213e+00	1.196e+00	1.196e+00	1.206e+00	1.217e+00	1.239e+00	1.211e+00	1.190e+00	1.219e+00
79	1.223e+00	1.206e+00	1.206e+00	1.216e+00	1.226e+00	1.248e+00	1.220e+00	1.200e+00	1.229e+00
80	1.232e+00	1.216e+00	1.214e+00	1.226e+00	1.236e+00	1.258e+00	1.229e+00	1.209e+00	1.239e+00
81	1.242e+00	1.225e+00	1.221e+00	1.235e+00	1.245e+00	1.269e+00	1.238e+00	1.219e+00	1.248e+00
82	1.251e+00	1.234e+00	1.229e+00	1.245e+00	1.255e+00	1.279e+00	1.247e+00	1.228e+00	1.258e+00
83	1.260e+00	1.242e+00	1.236e+00	1.255e+00	1.264e+00	1.289e+00	1.256e+00	1.238e+00	1.267e+00
84	1.269e+00	1.250e+00	1.241e+00	1.265e+00	1.272e+00	1.299e+00	1.265e+00	1.248e+00	1.277e+00
85	1.278e+00	1.257e+00	1.248e+00	1.275e+00	1.281e+00	1.309e+00	1.274e+00	1.257e+00	1.286e+00
86	1.287e+00	1.266e+00	1.255e+00	1.284e+00	1.290e+00	1.319e+00	1.283e+00	1.266e+00	1.296e+00
87	1.296e+00	1.274e+00	1.261e+00	1.294e+00	1.298e+00	1.329e+00	1.292e+00	1.274e+00	1.306e+00
88	1.305e+00	1.281e+00	1.268e+00	1.303e+00	1.306e+00	1.338e+00	1.300e+00	1.283e+00	1.315e+00
89	1.314e+00	1.289e+00	1.277e+00	1.311e+00	1.314e+00	1.347e+00	1.308e+00	1.291e+00	1.324e+00
90	1.324e+00	1.297e+00	1.286e+00	1.320e+00	1.322e+00	1.355e+00	1.316e+00	1.298e+00	1.332e+00
91	1.333e+00	1.305e+00	1.295e+00	1.327e+00	1.329e+00	1.362e+00	1.323e+00	1.306e+00	1.341e+00
92	1.341e+00	1.311e+00	1.304e+00	1.334e+00	1.335e+00	1.368e+00	1.329e+00	1.313e+00	1.348e+00
93	1.349e+00	1.317e+00	1.313e+00	1.340e+00	1.341e+00	1.372e+00	1.336e+00	1.319e+00	1.356e+00
94	1.357e+00	1.323e+00	1.322e+00	1.345e+00	1.346e+00	1.376e+00	1.342e+00	1.325e+00	1.363e+00
95	1.364e+00	1.328e+00	1.331e+00	1.350e+00	1.350e+00	1.378e+00	1.347e+00	1.331e+00	1.370e+00
96	1.370e+00	1.333e+00	1.340e+00	1.354e+00	1.355e+00	1.380e+00	1.352e+00	1.336e+00	1.376e+00
97	1.376e+00	1.337e+00	1.349e+00	1.357e+00	1.358e+00	1.380e+00	1.356e+00	1.341e+00	1.382e+00
98	1.381e+00	1.341e+00	1.358e+00	1.360e+00	1.361e+00	1.379e+00	1.360e+00	1.345e+00	1.387e+00
99	1.386e+00	1.344e+00	1.367e+00	1.361e+00	1.363e+00	1.377e+00	1.363e+00	1.349e+00	1.392e+00
100	1.390e+00	1.347e+00	1.376e+00	1.362e+00	1.365e+00	1.375e+00	1.366e+00	1.353e+00	1.397e+00
