# Supplementary material for: Evaluating the Potential of Younger Cases and Older Controls Cohorts to Improve Discovery Power in Genome-Wide Association Studies of Late-Onset Diseases
Source: MDPI journal article supplement (doi:10.3390/jpm9030038), 2019-07-22
Supplement: s2 [file s2 › SuppFiles/Results/LODsCommonLow/ColorectalCancer/CasesMultipleYoungOldCohortStatisticalPower.csv]

age	X1	X2	X3	X4	X5	X6	X7	X8	X9
50	1.000e+00	1.000e+00	1.000e+00	1.000e+00	1.000e+00	1.000e+00	1.000e+00	1.000e+00	1.000e+00
51	9.995e-01	9.995e-01	9.996e-01	9.994e-01	9.995e-01	9.996e-01	9.994e-01	9.996e-01	9.996e-01
52	9.988e-01	9.988e-01	9.989e-01	9.986e-01	9.988e-01	9.991e-01	9.987e-01	9.989e-01	9.989e-01
53	9.979e-01	9.980e-01	9.980e-01	9.977e-01	9.979e-01	9.983e-01	9.979e-01	9.982e-01	9.980e-01
54	9.968e-01	9.970e-01	9.970e-01	9.966e-01	9.969e-01	9.973e-01	9.968e-01	9.972e-01	9.970e-01
55	9.955e-01	9.957e-01	9.958e-01	9.954e-01	9.957e-01	9.962e-01	9.956e-01	9.960e-01	9.957e-01
56	9.941e-01	9.943e-01	9.944e-01	9.939e-01	9.942e-01	9.948e-01	9.942e-01	9.946e-01	9.943e-01
57	9.924e-01	9.927e-01	9.928e-01	9.923e-01	9.926e-01	9.933e-01	9.926e-01	9.930e-01	9.928e-01
58	9.906e-01	9.909e-01	9.910e-01	9.904e-01	9.909e-01	9.915e-01	9.908e-01	9.913e-01	9.910e-01
59	9.885e-01	9.889e-01	9.890e-01	9.884e-01	9.889e-01	9.895e-01	9.889e-01	9.894e-01	9.890e-01
60	9.863e-01	9.868e-01	9.870e-01	9.863e-01	9.868e-01	9.873e-01	9.868e-01	9.872e-01	9.870e-01
61	9.839e-01	9.845e-01	9.847e-01	9.840e-01	9.846e-01	9.851e-01	9.846e-01	9.850e-01	9.847e-01
62	9.814e-01	9.820e-01	9.823e-01	9.816e-01	9.821e-01	9.826e-01	9.821e-01	9.825e-01	9.821e-01
63	9.785e-01	9.792e-01	9.795e-01	9.788e-01	9.794e-01	9.798e-01	9.795e-01	9.798e-01	9.795e-01
64	9.757e-01	9.763e-01	9.766e-01	9.759e-01	9.766e-01	9.768e-01	9.767e-01	9.769e-01	9.767e-01
65	9.724e-01	9.731e-01	9.736e-01	9.729e-01	9.736e-01	9.737e-01	9.736e-01	9.737e-01	9.736e-01
66	9.690e-01	9.697e-01	9.702e-01	9.695e-01	9.703e-01	9.704e-01	9.704e-01	9.704e-01	9.703e-01
67	9.654e-01	9.661e-01	9.666e-01	9.660e-01	9.667e-01	9.669e-01	9.669e-01	9.668e-01	9.667e-01
68	9.616e-01	9.621e-01	9.627e-01	9.622e-01	9.629e-01	9.631e-01	9.631e-01	9.631e-01	9.630e-01
69	9.574e-01	9.581e-01	9.587e-01	9.582e-01	9.590e-01	9.592e-01	9.592e-01	9.591e-01	9.590e-01
70	9.532e-01	9.537e-01	9.543e-01	9.539e-01	9.548e-01	9.550e-01	9.550e-01	9.548e-01	9.548e-01
71	9.487e-01	9.491e-01	9.498e-01	9.496e-01	9.503e-01	9.507e-01	9.506e-01	9.504e-01	9.503e-01
72	9.441e-01	9.444e-01	9.451e-01	9.449e-01	9.458e-01	9.462e-01	9.461e-01	9.459e-01	9.457e-01
73	9.392e-01	9.395e-01	9.401e-01	9.401e-01	9.409e-01	9.414e-01	9.412e-01	9.410e-01	9.410e-01
74	9.342e-01	9.343e-01	9.349e-01	9.351e-01	9.359e-01	9.365e-01	9.362e-01	9.359e-01	9.360e-01
75	9.291e-01	9.290e-01	9.296e-01	9.299e-01	9.308e-01	9.314e-01	9.311e-01	9.308e-01	9.309e-01
76	9.238e-01	9.237e-01	9.242e-01	9.246e-01	9.255e-01	9.263e-01	9.258e-01	9.255e-01	9.258e-01
77	9.182e-01	9.182e-01	9.187e-01	9.191e-01	9.201e-01	9.208e-01	9.203e-01	9.200e-01	9.204e-01
78	9.126e-01	9.126e-01	9.131e-01	9.135e-01	9.144e-01	9.153e-01	9.148e-01	9.143e-01	9.149e-01
79	9.069e-01	9.069e-01	9.074e-01	9.079e-01	9.089e-01	9.097e-01	9.092e-01	9.088e-01	9.094e-01
80	9.011e-01	9.012e-01	9.015e-01	9.021e-01	9.031e-01	9.041e-01	9.036e-01	9.030e-01	9.039e-01
81	8.952e-01	8.953e-01	8.955e-01	8.963e-01	8.973e-01	8.984e-01	8.978e-01	8.972e-01	8.982e-01
82	8.892e-01	8.894e-01	8.895e-01	8.905e-01	8.914e-01	8.927e-01	8.920e-01	8.914e-01	8.925e-01
83	8.833e-01	8.834e-01	8.833e-01	8.847e-01	8.856e-01	8.869e-01	8.862e-01	8.856e-01	8.868e-01
84	8.773e-01	8.773e-01	8.771e-01	8.789e-01	8.796e-01	8.811e-01	8.804e-01	8.797e-01	8.809e-01
85	8.714e-01	8.714e-01	8.709e-01	8.731e-01	8.737e-01	8.754e-01	8.746e-01	8.738e-01	8.750e-01
86	8.655e-01	8.653e-01	8.648e-01	8.672e-01	8.679e-01	8.696e-01	8.688e-01	8.680e-01	8.691e-01
87	8.597e-01	8.594e-01	8.587e-01	8.614e-01	8.620e-01	8.639e-01	8.630e-01	8.621e-01	8.630e-01
88	8.539e-01	8.534e-01	8.527e-01	8.556e-01	8.562e-01	8.581e-01	8.573e-01	8.563e-01	8.570e-01
89	8.483e-01	8.475e-01	8.467e-01	8.499e-01	8.504e-01	8.525e-01	8.516e-01	8.506e-01	8.509e-01
90	8.428e-01	8.416e-01	8.409e-01	8.443e-01	8.447e-01	8.468e-01	8.460e-01	8.449e-01	8.448e-01
91	8.372e-01	8.358e-01	8.352e-01	8.387e-01	8.390e-01	8.412e-01	8.404e-01	8.393e-01	8.389e-01
92	8.317e-01	8.298e-01	8.296e-01	8.331e-01	8.333e-01	8.358e-01	8.348e-01	8.338e-01	8.332e-01
93	8.263e-01	8.239e-01	8.241e-01	8.275e-01	8.275e-01	8.302e-01	8.293e-01	8.284e-01	8.276e-01
94	8.208e-01	8.181e-01	8.186e-01	8.220e-01	8.218e-01	8.249e-01	8.238e-01	8.230e-01	8.221e-01
95	8.153e-01	8.122e-01	8.132e-01	8.165e-01	8.160e-01	8.195e-01	8.183e-01	8.177e-01	8.167e-01
96	8.100e-01	8.063e-01	8.080e-01	8.110e-01	8.104e-01	8.143e-01	8.128e-01	8.125e-01	8.114e-01
97	8.046e-01	8.005e-01	8.028e-01	8.055e-01	8.046e-01	8.090e-01	8.074e-01	8.073e-01	8.062e-01
98	7.993e-01	7.946e-01	7.978e-01	8.001e-01	7.989e-01	8.039e-01	8.020e-01	8.021e-01	8.011e-01
99	7.939e-01	7.887e-01	7.928e-01	7.946e-01	7.932e-01	7.988e-01	7.966e-01	7.970e-01	7.961e-01
100	7.887e-01	7.829e-01	7.879e-01	7.892e-01	7.875e-01	7.937e-01	7.913e-01	7.920e-01	7.913e-01
