# Supplementary material for: Evaluating the Potential of Younger Cases and Older Controls Cohorts to Improve Discovery Power in Genome-Wide Association Studies of Late-Onset Diseases
Source: MDPI journal article supplement (doi:10.3390/jpm9030038), 2019-07-22
Supplement: s2 [file s2 › SuppFiles/Results/LODsCommonLow/ColorectalCancer/CasesNeededCohortStatisticalPower.csv]

age	X1	X2	X3	X4	X5	X6	X7	X8	X9
50	5.093e+04	1.180e+05	4.816e+05	1.640e+04	3.757e+04	1.524e+05	1.228e+04	2.964e+04	1.229e+05
51	5.110e+04	1.183e+05	4.847e+05	1.645e+04	3.768e+04	1.535e+05	1.232e+04	2.972e+04	1.232e+05
52	5.127e+04	1.186e+05	4.878e+05	1.650e+04	3.781e+04	1.547e+05	1.237e+04	2.982e+04	1.237e+05
53	5.146e+04	1.190e+05	4.909e+05	1.656e+04	3.795e+04	1.559e+05	1.243e+04	2.992e+04	1.241e+05
54	5.167e+04	1.194e+05	4.938e+05	1.663e+04	3.811e+04	1.572e+05	1.248e+04	3.003e+04	1.246e+05
55	5.188e+04	1.198e+05	4.968e+05	1.670e+04	3.829e+04	1.584e+05	1.254e+04	3.015e+04	1.252e+05
56	5.211e+04	1.203e+05	4.997e+05	1.678e+04	3.848e+04	1.596e+05	1.260e+04	3.028e+04	1.258e+05
57	5.236e+04	1.208e+05	5.026e+05	1.686e+04	3.869e+04	1.609e+05	1.267e+04	3.041e+04	1.265e+05
58	5.262e+04	1.213e+05	5.054e+05	1.696e+04	3.892e+04	1.622e+05	1.274e+04	3.056e+04	1.272e+05
59	5.290e+04	1.219e+05	5.082e+05	1.705e+04	3.917e+04	1.635e+05	1.282e+04	3.072e+04	1.280e+05
60	5.318e+04	1.226e+05	5.110e+05	1.716e+04	3.944e+04	1.649e+05	1.290e+04	3.089e+04	1.288e+05
61	5.347e+04	1.232e+05	5.137e+05	1.727e+04	3.974e+04	1.663e+05	1.298e+04	3.107e+04	1.297e+05
62	5.378e+04	1.240e+05	5.163e+05	1.739e+04	4.005e+04	1.677e+05	1.307e+04	3.126e+04	1.307e+05
63	5.415e+04	1.247e+05	5.184e+05	1.752e+04	4.037e+04	1.689e+05	1.317e+04	3.147e+04	1.317e+05
64	5.455e+04	1.256e+05	5.201e+05	1.765e+04	4.072e+04	1.700e+05	1.327e+04	3.169e+04	1.328e+05
65	5.498e+04	1.265e+05	5.217e+05	1.779e+04	4.108e+04	1.711e+05	1.338e+04	3.192e+04	1.339e+05
66	5.543e+04	1.274e+05	5.239e+05	1.792e+04	4.143e+04	1.722e+05	1.348e+04	3.215e+04	1.350e+05
67	5.591e+04	1.283e+05	5.263e+05	1.806e+04	4.178e+04	1.735e+05	1.359e+04	3.240e+04	1.362e+05
68	5.643e+04	1.293e+05	5.286e+05	1.821e+04	4.213e+04	1.747e+05	1.371e+04	3.265e+04	1.374e+05
69	5.695e+04	1.304e+05	5.315e+05	1.836e+04	4.247e+04	1.760e+05	1.382e+04	3.290e+04	1.387e+05
70	5.748e+04	1.315e+05	5.353e+05	1.851e+04	4.282e+04	1.773e+05	1.393e+04	3.315e+04	1.399e+05
71	5.803e+04	1.326e+05	5.394e+05	1.867e+04	4.316e+04	1.787e+05	1.405e+04	3.341e+04	1.412e+05
72	5.857e+04	1.338e+05	5.438e+05	1.882e+04	4.352e+04	1.802e+05	1.417e+04	3.367e+04	1.425e+05
73	5.911e+04	1.350e+05	5.488e+05	1.898e+04	4.387e+04	1.815e+05	1.428e+04	3.393e+04	1.438e+05
74	5.966e+04	1.362e+05	5.544e+05	1.914e+04	4.423e+04	1.830e+05	1.440e+04	3.419e+04	1.451e+05
75	6.020e+04	1.374e+05	5.598e+05	1.930e+04	4.459e+04	1.844e+05	1.452e+04	3.446e+04	1.463e+05
76	6.072e+04	1.387e+05	5.650e+05	1.946e+04	4.496e+04	1.858e+05	1.463e+04	3.473e+04	1.475e+05
77	6.125e+04	1.399e+05	5.705e+05	1.962e+04	4.533e+04	1.873e+05	1.475e+04	3.500e+04	1.487e+05
78	6.176e+04	1.412e+05	5.760e+05	1.979e+04	4.571e+04	1.887e+05	1.487e+04	3.528e+04	1.499e+05
79	6.226e+04	1.424e+05	5.809e+05	1.995e+04	4.607e+04	1.902e+05	1.498e+04	3.556e+04	1.510e+05
80	6.275e+04	1.435e+05	5.848e+05	2.011e+04	4.643e+04	1.917e+05	1.509e+04	3.584e+04	1.522e+05
81	6.323e+04	1.446e+05	5.883e+05	2.027e+04	4.679e+04	1.933e+05	1.521e+04	3.613e+04	1.534e+05
82	6.370e+04	1.456e+05	5.918e+05	2.042e+04	4.713e+04	1.949e+05	1.532e+04	3.642e+04	1.545e+05
83	6.417e+04	1.466e+05	5.951e+05	2.058e+04	4.747e+04	1.964e+05	1.543e+04	3.670e+04	1.557e+05
84	6.462e+04	1.475e+05	5.979e+05	2.075e+04	4.780e+04	1.980e+05	1.554e+04	3.698e+04	1.569e+05
85	6.508e+04	1.484e+05	6.009e+05	2.091e+04	4.813e+04	1.995e+05	1.565e+04	3.726e+04	1.581e+05
86	6.554e+04	1.494e+05	6.043e+05	2.106e+04	4.845e+04	2.010e+05	1.576e+04	3.752e+04	1.592e+05
87	6.600e+04	1.503e+05	6.075e+05	2.122e+04	4.877e+04	2.025e+05	1.586e+04	3.778e+04	1.604e+05
88	6.645e+04	1.512e+05	6.109e+05	2.137e+04	4.908e+04	2.039e+05	1.597e+04	3.802e+04	1.616e+05
89	6.694e+04	1.522e+05	6.150e+05	2.151e+04	4.937e+04	2.052e+05	1.607e+04	3.826e+04	1.627e+05
90	6.744e+04	1.531e+05	6.193e+05	2.164e+04	4.965e+04	2.065e+05	1.616e+04	3.849e+04	1.637e+05
91	6.789e+04	1.540e+05	6.236e+05	2.177e+04	4.991e+04	2.075e+05	1.625e+04	3.871e+04	1.647e+05
92	6.831e+04	1.547e+05	6.278e+05	2.188e+04	5.015e+04	2.084e+05	1.633e+04	3.891e+04	1.657e+05
93	6.871e+04	1.555e+05	6.323e+05	2.198e+04	5.037e+04	2.091e+05	1.640e+04	3.910e+04	1.666e+05
94	6.910e+04	1.562e+05	6.366e+05	2.207e+04	5.057e+04	2.096e+05	1.648e+04	3.928e+04	1.675e+05
95	6.944e+04	1.568e+05	6.410e+05	2.214e+04	5.073e+04	2.100e+05	1.654e+04	3.945e+04	1.683e+05
96	6.977e+04	1.573e+05	6.453e+05	2.221e+04	5.089e+04	2.102e+05	1.660e+04	3.961e+04	1.691e+05
97	7.007e+04	1.578e+05	6.497e+05	2.226e+04	5.102e+04	2.103e+05	1.665e+04	3.975e+04	1.698e+05
98	7.034e+04	1.583e+05	6.541e+05	2.230e+04	5.113e+04	2.102e+05	1.670e+04	3.988e+04	1.705e+05
99	7.058e+04	1.587e+05	6.584e+05	2.233e+04	5.121e+04	2.099e+05	1.674e+04	3.999e+04	1.711e+05
100	7.079e+04	1.590e+05	6.628e+05	2.235e+04	5.127e+04	2.094e+05	1.677e+04	4.009e+04	1.717e+05
