# Supplementary material for: Evaluating the Potential of Younger Cases and Older Controls Cohorts to Improve Discovery Power in Genome-Wide Association Studies of Late-Onset Diseases
Source: MDPI journal article supplement (doi:10.3390/jpm9030038), 2019-07-22
Supplement: s2 [file s2 › SuppFiles/Results/LODsCommonLow/ColorectalCancer/CasesNeededYoungOldCohortStatisticalPower.csv]

age	X1	X2	X3	X4	X5	X6	X7	X8	X9
50	5.093e+04	1.180e+05	4.816e+05	1.640e+04	3.757e+04	1.524e+05	1.228e+04	2.964e+04	1.229e+05
51	5.090e+04	1.180e+05	4.815e+05	1.639e+04	3.755e+04	1.523e+05	1.227e+04	2.963e+04	1.228e+05
52	5.087e+04	1.179e+05	4.811e+05	1.638e+04	3.753e+04	1.522e+05	1.226e+04	2.961e+04	1.227e+05
53	5.082e+04	1.178e+05	4.807e+05	1.637e+04	3.749e+04	1.521e+05	1.225e+04	2.959e+04	1.226e+05
54	5.077e+04	1.177e+05	4.802e+05	1.635e+04	3.746e+04	1.520e+05	1.224e+04	2.956e+04	1.225e+05
55	5.070e+04	1.175e+05	4.796e+05	1.633e+04	3.741e+04	1.518e+05	1.223e+04	2.952e+04	1.224e+05
56	5.063e+04	1.173e+05	4.789e+05	1.630e+04	3.735e+04	1.516e+05	1.221e+04	2.948e+04	1.222e+05
57	5.054e+04	1.172e+05	4.782e+05	1.628e+04	3.729e+04	1.514e+05	1.219e+04	2.944e+04	1.220e+05
58	5.045e+04	1.169e+05	4.773e+05	1.625e+04	3.723e+04	1.511e+05	1.217e+04	2.938e+04	1.218e+05
59	5.034e+04	1.167e+05	4.764e+05	1.621e+04	3.716e+04	1.508e+05	1.214e+04	2.933e+04	1.215e+05
60	5.023e+04	1.165e+05	4.754e+05	1.618e+04	3.708e+04	1.504e+05	1.212e+04	2.926e+04	1.213e+05
61	5.011e+04	1.162e+05	4.743e+05	1.614e+04	3.699e+04	1.501e+05	1.209e+04	2.920e+04	1.210e+05
62	4.998e+04	1.159e+05	4.731e+05	1.610e+04	3.690e+04	1.497e+05	1.206e+04	2.912e+04	1.207e+05
63	4.983e+04	1.156e+05	4.718e+05	1.606e+04	3.680e+04	1.493e+05	1.203e+04	2.904e+04	1.204e+05
64	4.969e+04	1.152e+05	4.704e+05	1.601e+04	3.669e+04	1.488e+05	1.199e+04	2.896e+04	1.200e+05
65	4.952e+04	1.148e+05	4.689e+05	1.596e+04	3.658e+04	1.484e+05	1.196e+04	2.886e+04	1.196e+05
66	4.935e+04	1.144e+05	4.673e+05	1.590e+04	3.646e+04	1.479e+05	1.192e+04	2.877e+04	1.192e+05
67	4.917e+04	1.140e+05	4.655e+05	1.585e+04	3.632e+04	1.473e+05	1.187e+04	2.866e+04	1.188e+05
68	4.897e+04	1.135e+05	4.637e+05	1.578e+04	3.618e+04	1.468e+05	1.183e+04	2.855e+04	1.183e+05
69	4.876e+04	1.131e+05	4.617e+05	1.572e+04	3.603e+04	1.462e+05	1.178e+04	2.843e+04	1.179e+05
70	4.854e+04	1.125e+05	4.596e+05	1.565e+04	3.587e+04	1.455e+05	1.173e+04	2.830e+04	1.173e+05
71	4.832e+04	1.120e+05	4.574e+05	1.558e+04	3.571e+04	1.449e+05	1.167e+04	2.817e+04	1.168e+05
72	4.808e+04	1.115e+05	4.552e+05	1.550e+04	3.553e+04	1.442e+05	1.162e+04	2.804e+04	1.162e+05
73	4.783e+04	1.109e+05	4.528e+05	1.542e+04	3.535e+04	1.434e+05	1.156e+04	2.789e+04	1.156e+05
74	4.758e+04	1.103e+05	4.503e+05	1.534e+04	3.517e+04	1.427e+05	1.150e+04	2.774e+04	1.150e+05
75	4.732e+04	1.096e+05	4.477e+05	1.525e+04	3.497e+04	1.419e+05	1.143e+04	2.759e+04	1.144e+05
76	4.705e+04	1.090e+05	4.451e+05	1.517e+04	3.477e+04	1.411e+05	1.137e+04	2.744e+04	1.138e+05
77	4.676e+04	1.084e+05	4.425e+05	1.508e+04	3.457e+04	1.403e+05	1.130e+04	2.727e+04	1.131e+05
78	4.648e+04	1.077e+05	4.398e+05	1.498e+04	3.436e+04	1.395e+05	1.123e+04	2.710e+04	1.124e+05
79	4.619e+04	1.070e+05	4.370e+05	1.489e+04	3.415e+04	1.386e+05	1.117e+04	2.694e+04	1.118e+05
80	4.589e+04	1.064e+05	4.342e+05	1.480e+04	3.393e+04	1.378e+05	1.110e+04	2.677e+04	1.111e+05
81	4.559e+04	1.057e+05	4.313e+05	1.470e+04	3.371e+04	1.369e+05	1.103e+04	2.660e+04	1.104e+05
82	4.529e+04	1.050e+05	4.284e+05	1.461e+04	3.349e+04	1.360e+05	1.095e+04	2.642e+04	1.097e+05
83	4.499e+04	1.043e+05	4.255e+05	1.451e+04	3.327e+04	1.351e+05	1.088e+04	2.625e+04	1.090e+05
84	4.468e+04	1.035e+05	4.224e+05	1.442e+04	3.305e+04	1.343e+05	1.081e+04	2.608e+04	1.083e+05
85	4.438e+04	1.028e+05	4.195e+05	1.432e+04	3.283e+04	1.334e+05	1.074e+04	2.590e+04	1.075e+05
86	4.408e+04	1.021e+05	4.165e+05	1.422e+04	3.261e+04	1.325e+05	1.067e+04	2.573e+04	1.068e+05
87	4.378e+04	1.014e+05	4.136e+05	1.413e+04	3.239e+04	1.316e+05	1.060e+04	2.556e+04	1.060e+05
88	4.349e+04	1.007e+05	4.107e+05	1.403e+04	3.217e+04	1.308e+05	1.053e+04	2.538e+04	1.053e+05
89	4.320e+04	1.000e+05	4.078e+05	1.394e+04	3.195e+04	1.299e+05	1.046e+04	2.521e+04	1.046e+05
90	4.292e+04	9.933e+04	4.050e+05	1.385e+04	3.174e+04	1.290e+05	1.039e+04	2.504e+04	1.038e+05
91	4.264e+04	9.863e+04	4.023e+05	1.376e+04	3.152e+04	1.282e+05	1.032e+04	2.488e+04	1.031e+05
92	4.236e+04	9.793e+04	3.996e+05	1.367e+04	3.131e+04	1.274e+05	1.025e+04	2.472e+04	1.024e+05
93	4.208e+04	9.723e+04	3.969e+05	1.357e+04	3.109e+04	1.265e+05	1.018e+04	2.456e+04	1.017e+05
94	4.180e+04	9.655e+04	3.943e+05	1.348e+04	3.088e+04	1.257e+05	1.012e+04	2.440e+04	1.010e+05
95	4.152e+04	9.585e+04	3.917e+05	1.339e+04	3.066e+04	1.249e+05	1.005e+04	2.424e+04	1.004e+05
96	4.125e+04	9.516e+04	3.892e+05	1.330e+04	3.045e+04	1.241e+05	9.982e+03	2.408e+04	9.971e+04
97	4.098e+04	9.447e+04	3.867e+05	1.321e+04	3.023e+04	1.233e+05	9.915e+03	2.393e+04	9.907e+04
98	4.071e+04	9.377e+04	3.842e+05	1.312e+04	3.001e+04	1.225e+05	9.849e+03	2.378e+04	9.845e+04
99	4.043e+04	9.308e+04	3.818e+05	1.303e+04	2.980e+04	1.217e+05	9.783e+03	2.363e+04	9.783e+04
100	4.017e+04	9.239e+04	3.795e+05	1.295e+04	2.959e+04	1.209e+05	9.718e+03	2.348e+04	9.724e+04
