# Supplementary material for: Evaluating the Potential of Younger Cases and Older Controls Cohorts to Improve Discovery Power in Genome-Wide Association Studies of Late-Onset Diseases
Source: MDPI journal article supplement (doi:10.3390/jpm9030038), 2019-07-22
Supplement: s2 [file s2 › SuppFiles/Results/LODsCommonLow/LungCancer/CasesMultipleSameAgeCohortStatisticalPower.csv]

age	X1	X2	X3	X4	X5	X6	X7	X8	X9
53	1.000e+00	1.000e+00	1.000e+00	1.000e+00	1.000e+00	1.000e+00	1.000e+00	1.000e+00	1.000e+00
54	1.001e+00	9.992e-01	1.004e+00	9.988e-01	1.001e+00	9.983e-01	1.000e+00	1.001e+00	9.995e-01
55	1.001e+00	9.984e-01	1.009e+00	9.977e-01	1.003e+00	9.968e-01	1.000e+00	1.002e+00	9.988e-01
56	1.002e+00	9.976e-01	1.013e+00	9.967e-01	1.003e+00	9.955e-01	1.000e+00	1.002e+00	9.980e-01
57	1.002e+00	9.969e-01	1.017e+00	9.957e-01	1.004e+00	9.944e-01	1.000e+00	1.003e+00	9.971e-01
58	1.002e+00	9.961e-01	1.021e+00	9.947e-01	1.005e+00	9.934e-01	1.000e+00	1.003e+00	9.961e-01
59	1.002e+00	9.953e-01	1.025e+00	9.938e-01	1.005e+00	9.926e-01	1.000e+00	1.003e+00	9.949e-01
60	1.002e+00	9.946e-01	1.029e+00	9.929e-01	1.005e+00	9.920e-01	9.997e-01	1.003e+00	9.936e-01
61	1.002e+00	9.939e-01	1.033e+00	9.921e-01	1.005e+00	9.913e-01	9.994e-01	1.003e+00	9.923e-01
62	1.002e+00	9.930e-01	1.036e+00	9.912e-01	1.005e+00	9.911e-01	9.990e-01	1.003e+00	9.907e-01
63	1.001e+00	9.921e-01	1.040e+00	9.904e-01	1.004e+00	9.912e-01	9.985e-01	1.002e+00	9.889e-01
64	1.001e+00	9.913e-01	1.043e+00	9.896e-01	1.004e+00	9.911e-01	9.979e-01	1.002e+00	9.873e-01
65	1.000e+00	9.908e-01	1.046e+00	9.891e-01	1.003e+00	9.905e-01	9.973e-01	1.001e+00	9.859e-01
66	9.998e-01	9.905e-01	1.049e+00	9.887e-01	1.002e+00	9.899e-01	9.966e-01	1.001e+00	9.847e-01
67	9.991e-01	9.900e-01	1.052e+00	9.882e-01	1.001e+00	9.891e-01	9.958e-01	9.999e-01	9.833e-01
68	9.984e-01	9.895e-01	1.053e+00	9.876e-01	1.000e+00	9.882e-01	9.950e-01	9.994e-01	9.821e-01
69	9.976e-01	9.890e-01	1.055e+00	9.871e-01	9.987e-01	9.872e-01	9.942e-01	9.989e-01	9.810e-01
70	9.968e-01	9.882e-01	1.056e+00	9.865e-01	9.974e-01	9.860e-01	9.933e-01	9.983e-01	9.797e-01
71	9.959e-01	9.869e-01	1.056e+00	9.857e-01	9.960e-01	9.847e-01	9.923e-01	9.975e-01	9.781e-01
72	9.950e-01	9.856e-01	1.055e+00	9.850e-01	9.946e-01	9.830e-01	9.911e-01	9.968e-01	9.764e-01
73	9.941e-01	9.839e-01	1.054e+00	9.841e-01	9.931e-01	9.815e-01	9.898e-01	9.958e-01	9.746e-01
74	9.932e-01	9.820e-01	1.052e+00	9.830e-01	9.917e-01	9.799e-01	9.883e-01	9.947e-01	9.726e-01
75	9.923e-01	9.797e-01	1.050e+00	9.820e-01	9.904e-01	9.782e-01	9.867e-01	9.936e-01	9.702e-01
76	9.914e-01	9.776e-01	1.048e+00	9.808e-01	9.889e-01	9.766e-01	9.852e-01	9.922e-01	9.681e-01
77	9.903e-01	9.753e-01	1.046e+00	9.794e-01	9.873e-01	9.749e-01	9.834e-01	9.905e-01	9.660e-01
78	9.894e-01	9.729e-01	1.043e+00	9.777e-01	9.857e-01	9.732e-01	9.816e-01	9.884e-01	9.637e-01
79	9.882e-01	9.706e-01	1.040e+00	9.762e-01	9.840e-01	9.714e-01	9.796e-01	9.864e-01	9.617e-01
80	9.867e-01	9.685e-01	1.037e+00	9.745e-01	9.823e-01	9.692e-01	9.777e-01	9.844e-01	9.599e-01
81	9.852e-01	9.663e-01	1.033e+00	9.727e-01	9.804e-01	9.669e-01	9.755e-01	9.822e-01	9.581e-01
82	9.836e-01	9.643e-01	1.030e+00	9.709e-01	9.785e-01	9.646e-01	9.733e-01	9.800e-01	9.564e-01
83	9.818e-01	9.622e-01	1.027e+00	9.691e-01	9.766e-01	9.623e-01	9.711e-01	9.779e-01	9.549e-01
84	9.799e-01	9.603e-01	1.024e+00	9.674e-01	9.747e-01	9.598e-01	9.686e-01	9.757e-01	9.536e-01
85	9.780e-01	9.582e-01	1.022e+00	9.656e-01	9.725e-01	9.575e-01	9.663e-01	9.736e-01	9.520e-01
86	9.765e-01	9.562e-01	1.019e+00	9.637e-01	9.704e-01	9.551e-01	9.638e-01	9.716e-01	9.500e-01
87	9.748e-01	9.542e-01	1.016e+00	9.620e-01	9.683e-01	9.528e-01	9.613e-01	9.695e-01	9.479e-01
88	9.730e-01	9.519e-01	1.014e+00	9.601e-01	9.660e-01	9.504e-01	9.587e-01	9.674e-01	9.457e-01
89	9.714e-01	9.494e-01	1.011e+00	9.578e-01	9.636e-01	9.480e-01	9.563e-01	9.656e-01	9.434e-01
90	9.699e-01	9.467e-01	1.009e+00	9.556e-01	9.612e-01	9.456e-01	9.538e-01	9.638e-01	9.410e-01
91	9.678e-01	9.438e-01	1.006e+00	9.531e-01	9.586e-01	9.432e-01	9.513e-01	9.617e-01	9.387e-01
92	9.650e-01	9.408e-01	1.004e+00	9.503e-01	9.558e-01	9.406e-01	9.486e-01	9.594e-01	9.363e-01
93	9.619e-01	9.376e-01	1.001e+00	9.473e-01	9.529e-01	9.382e-01	9.459e-01	9.570e-01	9.340e-01
94	9.584e-01	9.343e-01	9.986e-01	9.442e-01	9.498e-01	9.357e-01	9.431e-01	9.545e-01	9.315e-01
95	9.545e-01	9.309e-01	9.959e-01	9.409e-01	9.465e-01	9.332e-01	9.403e-01	9.518e-01	9.290e-01
96	9.501e-01	9.274e-01	9.930e-01	9.374e-01	9.431e-01	9.307e-01	9.373e-01	9.491e-01	9.265e-01
97	9.454e-01	9.238e-01	9.901e-01	9.337e-01	9.396e-01	9.281e-01	9.342e-01	9.461e-01	9.239e-01
98	9.403e-01	9.201e-01	9.871e-01	9.299e-01	9.359e-01	9.255e-01	9.311e-01	9.430e-01	9.213e-01
99	9.346e-01	9.162e-01	9.840e-01	9.259e-01	9.321e-01	9.229e-01	9.280e-01	9.397e-01	9.186e-01
100	9.287e-01	9.121e-01	9.810e-01	9.217e-01	9.280e-01	9.203e-01	9.247e-01	9.363e-01	9.159e-01
