# Supplementary material for: Evaluating the Potential of Younger Cases and Older Controls Cohorts to Improve Discovery Power in Genome-Wide Association Studies of Late-Onset Diseases
Source: MDPI journal article supplement (doi:10.3390/jpm9030038), 2019-07-22
Supplement: s2 [file s2 › SuppFiles/Results/LODsCommonLow/LungCancer/CasesMultipleYoungOldCohortStatisticalPower.csv]

age	X1	X2	X3	X4	X5	X6	X7	X8	X9
53	1.000e+00	1.000e+00	1.000e+00	1.000e+00	1.000e+00	1.000e+00	1.000e+00	1.000e+00	1.000e+00
54	9.996e-01	9.996e-01	9.997e-01	9.995e-01	9.997e-01	9.995e-01	9.996e-01	9.996e-01	9.997e-01
55	9.989e-01	9.989e-01	9.990e-01	9.988e-01	9.991e-01	9.988e-01	9.989e-01	9.990e-01	9.991e-01
56	9.979e-01	9.979e-01	9.981e-01	9.978e-01	9.981e-01	9.978e-01	9.978e-01	9.980e-01	9.981e-01
57	9.965e-01	9.966e-01	9.968e-01	9.965e-01	9.969e-01	9.965e-01	9.965e-01	9.967e-01	9.969e-01
58	9.949e-01	9.949e-01	9.952e-01	9.949e-01	9.954e-01	9.948e-01	9.949e-01	9.951e-01	9.953e-01
59	9.929e-01	9.930e-01	9.934e-01	9.929e-01	9.935e-01	9.930e-01	9.930e-01	9.932e-01	9.934e-01
60	9.907e-01	9.908e-01	9.912e-01	9.906e-01	9.913e-01	9.907e-01	9.908e-01	9.909e-01	9.913e-01
61	9.880e-01	9.882e-01	9.887e-01	9.880e-01	9.887e-01	9.882e-01	9.883e-01	9.884e-01	9.887e-01
62	9.852e-01	9.854e-01	9.860e-01	9.853e-01	9.860e-01	9.854e-01	9.856e-01	9.857e-01	9.860e-01
63	9.820e-01	9.823e-01	9.829e-01	9.822e-01	9.829e-01	9.824e-01	9.826e-01	9.826e-01	9.829e-01
64	9.785e-01	9.788e-01	9.796e-01	9.786e-01	9.795e-01	9.789e-01	9.791e-01	9.791e-01	9.794e-01
65	9.747e-01	9.750e-01	9.759e-01	9.749e-01	9.758e-01	9.752e-01	9.755e-01	9.754e-01	9.756e-01
66	9.706e-01	9.710e-01	9.720e-01	9.708e-01	9.718e-01	9.712e-01	9.716e-01	9.715e-01	9.715e-01
67	9.661e-01	9.664e-01	9.678e-01	9.663e-01	9.673e-01	9.668e-01	9.672e-01	9.671e-01	9.670e-01
68	9.612e-01	9.616e-01	9.631e-01	9.615e-01	9.625e-01	9.619e-01	9.625e-01	9.624e-01	9.622e-01
69	9.560e-01	9.564e-01	9.582e-01	9.563e-01	9.573e-01	9.568e-01	9.574e-01	9.573e-01	9.569e-01
70	9.504e-01	9.508e-01	9.529e-01	9.508e-01	9.518e-01	9.513e-01	9.520e-01	9.519e-01	9.513e-01
71	9.444e-01	9.449e-01	9.472e-01	9.449e-01	9.460e-01	9.454e-01	9.462e-01	9.462e-01	9.453e-01
72	9.381e-01	9.385e-01	9.412e-01	9.386e-01	9.399e-01	9.390e-01	9.401e-01	9.401e-01	9.391e-01
73	9.315e-01	9.320e-01	9.351e-01	9.321e-01	9.335e-01	9.325e-01	9.337e-01	9.337e-01	9.326e-01
74	9.247e-01	9.251e-01	9.286e-01	9.254e-01	9.267e-01	9.257e-01	9.270e-01	9.270e-01	9.257e-01
75	9.174e-01	9.178e-01	9.217e-01	9.183e-01	9.197e-01	9.185e-01	9.201e-01	9.201e-01	9.185e-01
76	9.101e-01	9.105e-01	9.149e-01	9.111e-01	9.125e-01	9.112e-01	9.129e-01	9.129e-01	9.113e-01
77	9.026e-01	9.030e-01	9.077e-01	9.037e-01	9.051e-01	9.038e-01	9.056e-01	9.056e-01	9.038e-01
78	8.948e-01	8.952e-01	9.004e-01	8.959e-01	8.974e-01	8.961e-01	8.980e-01	8.980e-01	8.959e-01
79	8.870e-01	8.874e-01	8.929e-01	8.883e-01	8.898e-01	8.885e-01	8.904e-01	8.905e-01	8.882e-01
80	8.792e-01	8.795e-01	8.853e-01	8.806e-01	8.820e-01	8.808e-01	8.828e-01	8.828e-01	8.804e-01
81	8.712e-01	8.715e-01	8.776e-01	8.726e-01	8.741e-01	8.730e-01	8.750e-01	8.750e-01	8.725e-01
82	8.633e-01	8.635e-01	8.700e-01	8.648e-01	8.663e-01	8.652e-01	8.672e-01	8.673e-01	8.646e-01
83	8.553e-01	8.556e-01	8.624e-01	8.570e-01	8.584e-01	8.575e-01	8.594e-01	8.595e-01	8.568e-01
84	8.475e-01	8.476e-01	8.547e-01	8.491e-01	8.505e-01	8.497e-01	8.515e-01	8.518e-01	8.490e-01
85	8.397e-01	8.397e-01	8.471e-01	8.414e-01	8.427e-01	8.419e-01	8.438e-01	8.441e-01	8.413e-01
86	8.319e-01	8.318e-01	8.396e-01	8.336e-01	8.350e-01	8.344e-01	8.360e-01	8.364e-01	8.336e-01
87	8.242e-01	8.239e-01	8.321e-01	8.259e-01	8.271e-01	8.268e-01	8.283e-01	8.288e-01	8.260e-01
88	8.166e-01	8.162e-01	8.247e-01	8.182e-01	8.195e-01	8.194e-01	8.208e-01	8.214e-01	8.185e-01
89	8.091e-01	8.085e-01	8.173e-01	8.107e-01	8.120e-01	8.119e-01	8.133e-01	8.140e-01	8.110e-01
90	8.017e-01	8.008e-01	8.098e-01	8.031e-01	8.045e-01	8.045e-01	8.059e-01	8.067e-01	8.037e-01
91	7.943e-01	7.932e-01	8.025e-01	7.958e-01	7.972e-01	7.973e-01	7.987e-01	7.995e-01	7.963e-01
92	7.870e-01	7.857e-01	7.954e-01	7.886e-01	7.900e-01	7.902e-01	7.915e-01	7.923e-01	7.889e-01
93	7.798e-01	7.782e-01	7.882e-01	7.814e-01	7.828e-01	7.831e-01	7.844e-01	7.851e-01	7.816e-01
94	7.726e-01	7.708e-01	7.812e-01	7.743e-01	7.757e-01	7.762e-01	7.774e-01	7.781e-01	7.743e-01
95	7.654e-01	7.635e-01	7.743e-01	7.674e-01	7.688e-01	7.694e-01	7.706e-01	7.711e-01	7.671e-01
96	7.583e-01	7.562e-01	7.675e-01	7.605e-01	7.620e-01	7.627e-01	7.638e-01	7.642e-01	7.598e-01
97	7.513e-01	7.490e-01	7.607e-01	7.538e-01	7.552e-01	7.561e-01	7.571e-01	7.573e-01	7.526e-01
98	7.443e-01	7.419e-01	7.541e-01	7.471e-01	7.485e-01	7.495e-01	7.504e-01	7.505e-01	7.454e-01
99	7.375e-01	7.348e-01	7.475e-01	7.405e-01	7.418e-01	7.432e-01	7.439e-01	7.437e-01	7.382e-01
100	7.306e-01	7.278e-01	7.410e-01	7.340e-01	7.354e-01	7.368e-01	7.374e-01	7.370e-01	7.311e-01
