# Supplementary material for: Evaluating the Potential of Younger Cases and Older Controls Cohorts to Improve Discovery Power in Genome-Wide Association Studies of Late-Onset Diseases
Source: MDPI journal article supplement (doi:10.3390/jpm9030038), 2019-07-22
Supplement: s2 [file s2 › SuppFiles/Results/LODsCommonLow/LungCancer/CasesNeededCohortStatisticalPower.csv]

age	X1	X2	X3	X4	X5	X6	X7	X8	X9
53	4.816e+04	1.127e+05	4.361e+05	1.580e+04	3.629e+04	1.514e+05	1.190e+04	2.816e+04	1.221e+05
54	4.819e+04	1.126e+05	4.380e+05	1.578e+04	3.634e+04	1.512e+05	1.190e+04	2.818e+04	1.221e+05
55	4.822e+04	1.125e+05	4.399e+05	1.577e+04	3.638e+04	1.510e+05	1.190e+04	2.820e+04	1.220e+05
56	4.824e+04	1.124e+05	4.418e+05	1.575e+04	3.642e+04	1.508e+05	1.190e+04	2.822e+04	1.219e+05
57	4.826e+04	1.123e+05	4.436e+05	1.573e+04	3.645e+04	1.506e+05	1.190e+04	2.823e+04	1.218e+05
58	4.827e+04	1.122e+05	4.453e+05	1.572e+04	3.646e+04	1.504e+05	1.190e+04	2.824e+04	1.217e+05
59	4.827e+04	1.122e+05	4.471e+05	1.570e+04	3.648e+04	1.503e+05	1.190e+04	2.824e+04	1.215e+05
60	4.827e+04	1.121e+05	4.488e+05	1.569e+04	3.648e+04	1.502e+05	1.190e+04	2.824e+04	1.214e+05
61	4.826e+04	1.120e+05	4.504e+05	1.568e+04	3.648e+04	1.501e+05	1.189e+04	2.824e+04	1.212e+05
62	4.825e+04	1.119e+05	4.519e+05	1.566e+04	3.647e+04	1.501e+05	1.189e+04	2.823e+04	1.210e+05
63	4.823e+04	1.118e+05	4.535e+05	1.565e+04	3.645e+04	1.501e+05	1.188e+04	2.822e+04	1.208e+05
64	4.820e+04	1.117e+05	4.549e+05	1.564e+04	3.642e+04	1.501e+05	1.188e+04	2.820e+04	1.206e+05
65	4.818e+04	1.116e+05	4.563e+05	1.563e+04	3.639e+04	1.500e+05	1.187e+04	2.819e+04	1.204e+05
66	4.815e+04	1.116e+05	4.576e+05	1.562e+04	3.637e+04	1.499e+05	1.186e+04	2.817e+04	1.203e+05
67	4.812e+04	1.116e+05	4.587e+05	1.562e+04	3.633e+04	1.498e+05	1.185e+04	2.816e+04	1.201e+05
68	4.808e+04	1.115e+05	4.594e+05	1.561e+04	3.629e+04	1.497e+05	1.184e+04	2.814e+04	1.200e+05
69	4.804e+04	1.114e+05	4.600e+05	1.560e+04	3.625e+04	1.495e+05	1.183e+04	2.813e+04	1.198e+05
70	4.801e+04	1.114e+05	4.603e+05	1.559e+04	3.620e+04	1.493e+05	1.182e+04	2.811e+04	1.197e+05
71	4.796e+04	1.112e+05	4.604e+05	1.558e+04	3.615e+04	1.491e+05	1.181e+04	2.809e+04	1.195e+05
72	4.792e+04	1.111e+05	4.601e+05	1.557e+04	3.610e+04	1.489e+05	1.179e+04	2.807e+04	1.193e+05
73	4.788e+04	1.109e+05	4.596e+05	1.555e+04	3.604e+04	1.486e+05	1.178e+04	2.804e+04	1.190e+05
74	4.783e+04	1.106e+05	4.590e+05	1.553e+04	3.599e+04	1.484e+05	1.176e+04	2.801e+04	1.188e+05
75	4.779e+04	1.104e+05	4.580e+05	1.552e+04	3.594e+04	1.481e+05	1.174e+04	2.798e+04	1.185e+05
76	4.774e+04	1.102e+05	4.571e+05	1.550e+04	3.589e+04	1.479e+05	1.172e+04	2.794e+04	1.183e+05
77	4.769e+04	1.099e+05	4.560e+05	1.548e+04	3.583e+04	1.476e+05	1.170e+04	2.789e+04	1.180e+05
78	4.765e+04	1.096e+05	4.548e+05	1.545e+04	3.577e+04	1.474e+05	1.168e+04	2.783e+04	1.177e+05
79	4.759e+04	1.094e+05	4.536e+05	1.543e+04	3.571e+04	1.471e+05	1.166e+04	2.778e+04	1.175e+05
80	4.752e+04	1.091e+05	4.522e+05	1.540e+04	3.565e+04	1.468e+05	1.163e+04	2.772e+04	1.172e+05
81	4.744e+04	1.089e+05	4.507e+05	1.537e+04	3.558e+04	1.464e+05	1.161e+04	2.766e+04	1.170e+05
82	4.737e+04	1.087e+05	4.493e+05	1.534e+04	3.551e+04	1.461e+05	1.158e+04	2.760e+04	1.168e+05
83	4.728e+04	1.084e+05	4.481e+05	1.531e+04	3.544e+04	1.457e+05	1.156e+04	2.754e+04	1.166e+05
84	4.719e+04	1.082e+05	4.468e+05	1.529e+04	3.537e+04	1.454e+05	1.153e+04	2.747e+04	1.165e+05
85	4.710e+04	1.080e+05	4.456e+05	1.526e+04	3.530e+04	1.450e+05	1.150e+04	2.742e+04	1.163e+05
86	4.703e+04	1.077e+05	4.444e+05	1.523e+04	3.522e+04	1.446e+05	1.147e+04	2.736e+04	1.160e+05
87	4.695e+04	1.075e+05	4.432e+05	1.520e+04	3.514e+04	1.443e+05	1.144e+04	2.730e+04	1.158e+05
88	4.686e+04	1.073e+05	4.421e+05	1.517e+04	3.506e+04	1.439e+05	1.141e+04	2.724e+04	1.155e+05
89	4.678e+04	1.070e+05	4.410e+05	1.514e+04	3.497e+04	1.436e+05	1.138e+04	2.719e+04	1.152e+05
90	4.671e+04	1.067e+05	4.400e+05	1.510e+04	3.488e+04	1.432e+05	1.135e+04	2.714e+04	1.149e+05
91	4.661e+04	1.064e+05	4.389e+05	1.506e+04	3.479e+04	1.428e+05	1.132e+04	2.708e+04	1.147e+05
92	4.647e+04	1.060e+05	4.378e+05	1.502e+04	3.469e+04	1.425e+05	1.129e+04	2.702e+04	1.144e+05
93	4.633e+04	1.057e+05	4.367e+05	1.497e+04	3.458e+04	1.421e+05	1.126e+04	2.695e+04	1.141e+05
94	4.616e+04	1.053e+05	4.355e+05	1.492e+04	3.447e+04	1.417e+05	1.122e+04	2.688e+04	1.138e+05
95	4.597e+04	1.049e+05	4.343e+05	1.487e+04	3.435e+04	1.413e+05	1.119e+04	2.680e+04	1.135e+05
96	4.576e+04	1.045e+05	4.331e+05	1.481e+04	3.423e+04	1.409e+05	1.115e+04	2.673e+04	1.132e+05
97	4.553e+04	1.041e+05	4.318e+05	1.475e+04	3.410e+04	1.405e+05	1.112e+04	2.664e+04	1.129e+05
98	4.528e+04	1.037e+05	4.305e+05	1.469e+04	3.397e+04	1.402e+05	1.108e+04	2.655e+04	1.125e+05
99	4.501e+04	1.032e+05	4.292e+05	1.463e+04	3.383e+04	1.398e+05	1.104e+04	2.646e+04	1.122e+05
100	4.473e+04	1.028e+05	4.278e+05	1.456e+04	3.368e+04	1.394e+05	1.100e+04	2.636e+04	1.119e+05
