# Supplementary material for: Evaluating the Potential of Younger Cases and Older Controls Cohorts to Improve Discovery Power in Genome-Wide Association Studies of Late-Onset Diseases
Source: MDPI journal article supplement (doi:10.3390/jpm9030038), 2019-07-22
Supplement: s2 [file s2 › SuppFiles/Results/LODsCommonLow/LungCancer/CasesNeededYoungOldCohortStatisticalPower.csv]

age	X1	X2	X3	X4	X5	X6	X7	X8	X9
53	4.816e+04	1.127e+05	4.361e+05	1.580e+04	3.629e+04	1.514e+05	1.190e+04	2.816e+04	1.221e+05
54	4.814e+04	1.126e+05	4.360e+05	1.579e+04	3.628e+04	1.514e+05	1.190e+04	2.815e+04	1.221e+05
55	4.811e+04	1.126e+05	4.357e+05	1.578e+04	3.626e+04	1.513e+05	1.189e+04	2.813e+04	1.220e+05
56	4.806e+04	1.124e+05	4.353e+05	1.577e+04	3.622e+04	1.511e+05	1.187e+04	2.810e+04	1.219e+05
57	4.799e+04	1.123e+05	4.347e+05	1.575e+04	3.618e+04	1.509e+05	1.186e+04	2.807e+04	1.218e+05
58	4.791e+04	1.121e+05	4.340e+05	1.572e+04	3.612e+04	1.507e+05	1.184e+04	2.802e+04	1.216e+05
59	4.782e+04	1.119e+05	4.332e+05	1.569e+04	3.606e+04	1.504e+05	1.182e+04	2.797e+04	1.213e+05
60	4.771e+04	1.116e+05	4.323e+05	1.565e+04	3.598e+04	1.500e+05	1.179e+04	2.790e+04	1.211e+05
61	4.758e+04	1.114e+05	4.312e+05	1.561e+04	3.588e+04	1.497e+05	1.176e+04	2.783e+04	1.208e+05
62	4.744e+04	1.110e+05	4.300e+05	1.557e+04	3.578e+04	1.492e+05	1.173e+04	2.776e+04	1.204e+05
63	4.729e+04	1.107e+05	4.287e+05	1.552e+04	3.567e+04	1.488e+05	1.169e+04	2.767e+04	1.201e+05
64	4.713e+04	1.103e+05	4.272e+05	1.546e+04	3.555e+04	1.483e+05	1.165e+04	2.757e+04	1.196e+05
65	4.694e+04	1.099e+05	4.256e+05	1.541e+04	3.541e+04	1.477e+05	1.161e+04	2.747e+04	1.192e+05
66	4.674e+04	1.094e+05	4.239e+05	1.534e+04	3.527e+04	1.471e+05	1.156e+04	2.736e+04	1.187e+05
67	4.653e+04	1.089e+05	4.221e+05	1.527e+04	3.511e+04	1.464e+05	1.151e+04	2.723e+04	1.181e+05
68	4.629e+04	1.084e+05	4.200e+05	1.519e+04	3.493e+04	1.457e+05	1.145e+04	2.710e+04	1.175e+05
69	4.604e+04	1.078e+05	4.179e+05	1.511e+04	3.474e+04	1.449e+05	1.139e+04	2.696e+04	1.169e+05
70	4.577e+04	1.071e+05	4.156e+05	1.502e+04	3.454e+04	1.441e+05	1.133e+04	2.681e+04	1.162e+05
71	4.548e+04	1.065e+05	4.131e+05	1.493e+04	3.433e+04	1.432e+05	1.126e+04	2.664e+04	1.155e+05
72	4.518e+04	1.057e+05	4.105e+05	1.483e+04	3.411e+04	1.422e+05	1.119e+04	2.647e+04	1.147e+05
73	4.486e+04	1.050e+05	4.078e+05	1.473e+04	3.388e+04	1.412e+05	1.111e+04	2.629e+04	1.139e+05
74	4.453e+04	1.042e+05	4.050e+05	1.462e+04	3.363e+04	1.402e+05	1.103e+04	2.610e+04	1.131e+05
75	4.418e+04	1.034e+05	4.020e+05	1.451e+04	3.338e+04	1.391e+05	1.095e+04	2.591e+04	1.122e+05
76	4.383e+04	1.026e+05	3.990e+05	1.440e+04	3.312e+04	1.380e+05	1.086e+04	2.571e+04	1.113e+05
77	4.347e+04	1.018e+05	3.959e+05	1.428e+04	3.285e+04	1.369e+05	1.078e+04	2.550e+04	1.104e+05
78	4.309e+04	1.009e+05	3.927e+05	1.416e+04	3.257e+04	1.357e+05	1.069e+04	2.529e+04	1.094e+05
79	4.272e+04	1.000e+05	3.894e+05	1.404e+04	3.229e+04	1.346e+05	1.060e+04	2.508e+04	1.085e+05
80	4.234e+04	9.911e+04	3.861e+05	1.392e+04	3.201e+04	1.334e+05	1.051e+04	2.486e+04	1.075e+05
81	4.196e+04	9.821e+04	3.827e+05	1.379e+04	3.172e+04	1.322e+05	1.041e+04	2.464e+04	1.066e+05
82	4.158e+04	9.730e+04	3.794e+05	1.367e+04	3.144e+04	1.310e+05	1.032e+04	2.442e+04	1.056e+05
83	4.119e+04	9.641e+04	3.761e+05	1.354e+04	3.115e+04	1.299e+05	1.023e+04	2.420e+04	1.047e+05
84	4.081e+04	9.551e+04	3.727e+05	1.342e+04	3.087e+04	1.287e+05	1.013e+04	2.399e+04	1.037e+05
85	4.044e+04	9.461e+04	3.694e+05	1.330e+04	3.058e+04	1.275e+05	1.004e+04	2.377e+04	1.028e+05
86	4.007e+04	9.372e+04	3.662e+05	1.317e+04	3.030e+04	1.264e+05	9.949e+03	2.355e+04	1.018e+05
87	3.969e+04	9.284e+04	3.629e+05	1.305e+04	3.002e+04	1.252e+05	9.857e+03	2.334e+04	1.009e+05
88	3.933e+04	9.197e+04	3.597e+05	1.293e+04	2.974e+04	1.241e+05	9.768e+03	2.313e+04	9.998e+04
89	3.896e+04	9.110e+04	3.564e+05	1.281e+04	2.947e+04	1.230e+05	9.679e+03	2.292e+04	9.907e+04
90	3.861e+04	9.024e+04	3.532e+05	1.269e+04	2.920e+04	1.218e+05	9.590e+03	2.272e+04	9.817e+04
91	3.825e+04	8.938e+04	3.500e+05	1.258e+04	2.893e+04	1.207e+05	9.504e+03	2.251e+04	9.727e+04
92	3.790e+04	8.853e+04	3.469e+05	1.246e+04	2.867e+04	1.197e+05	9.419e+03	2.231e+04	9.637e+04
93	3.755e+04	8.769e+04	3.437e+05	1.235e+04	2.841e+04	1.186e+05	9.335e+03	2.211e+04	9.547e+04
94	3.721e+04	8.686e+04	3.407e+05	1.224e+04	2.815e+04	1.176e+05	9.252e+03	2.191e+04	9.459e+04
95	3.686e+04	8.603e+04	3.377e+05	1.213e+04	2.790e+04	1.165e+05	9.170e+03	2.171e+04	9.370e+04
96	3.652e+04	8.521e+04	3.347e+05	1.202e+04	2.765e+04	1.155e+05	9.089e+03	2.152e+04	9.281e+04
97	3.618e+04	8.440e+04	3.318e+05	1.191e+04	2.741e+04	1.145e+05	9.009e+03	2.132e+04	9.192e+04
98	3.585e+04	8.360e+04	3.289e+05	1.181e+04	2.716e+04	1.135e+05	8.930e+03	2.113e+04	9.105e+04
99	3.552e+04	8.280e+04	3.260e+05	1.170e+04	2.692e+04	1.125e+05	8.852e+03	2.094e+04	9.018e+04
100	3.519e+04	8.201e+04	3.232e+05	1.160e+04	2.669e+04	1.116e+05	8.775e+03	2.075e+04	8.930e+04
