# Supplementary material for: Evaluating the Potential of Younger Cases and Older Controls Cohorts to Improve Discovery Power in Genome-Wide Association Studies of Late-Onset Diseases
Source: MDPI journal article supplement (doi:10.3390/jpm9030038), 2019-07-22
Supplement: s2 [file s2 › SuppFiles/Results/LODsCommonLow/ProstateCancer/CasesMultipleSameAgeCohortStatisticalPower.csv]

age	X1	X2	X3	X4	X5	X6	X7	X8	X9
53	1.000e+00	1.000e+00	1.000e+00	1.000e+00	1.000e+00	1.000e+00	1.000e+00	1.000e+00	1.000e+00
54	1.030e+00	1.031e+00	1.031e+00	1.029e+00	1.026e+00	1.029e+00	1.029e+00	1.028e+00	1.031e+00
55	1.060e+00	1.062e+00	1.063e+00	1.059e+00	1.053e+00	1.059e+00	1.059e+00	1.057e+00	1.062e+00
56	1.090e+00	1.093e+00	1.096e+00	1.089e+00	1.080e+00	1.088e+00	1.089e+00	1.086e+00	1.092e+00
57	1.120e+00	1.124e+00	1.128e+00	1.119e+00	1.107e+00	1.118e+00	1.119e+00	1.115e+00	1.123e+00
58	1.151e+00	1.156e+00	1.161e+00	1.148e+00	1.134e+00	1.149e+00	1.149e+00	1.145e+00	1.154e+00
59	1.182e+00	1.187e+00	1.195e+00	1.179e+00	1.162e+00	1.179e+00	1.179e+00	1.174e+00	1.185e+00
60	1.213e+00	1.218e+00	1.228e+00	1.208e+00	1.190e+00	1.209e+00	1.210e+00	1.204e+00	1.215e+00
61	1.243e+00	1.249e+00	1.261e+00	1.238e+00	1.218e+00	1.240e+00	1.240e+00	1.233e+00	1.244e+00
62	1.274e+00	1.280e+00	1.296e+00	1.268e+00	1.247e+00	1.270e+00	1.270e+00	1.263e+00	1.274e+00
63	1.304e+00	1.310e+00	1.330e+00	1.298e+00	1.276e+00	1.300e+00	1.301e+00	1.293e+00	1.302e+00
64	1.334e+00	1.340e+00	1.363e+00	1.327e+00	1.305e+00	1.330e+00	1.330e+00	1.322e+00	1.330e+00
65	1.364e+00	1.368e+00	1.394e+00	1.354e+00	1.333e+00	1.358e+00	1.358e+00	1.349e+00	1.356e+00
66	1.392e+00	1.394e+00	1.424e+00	1.381e+00	1.361e+00	1.385e+00	1.385e+00	1.376e+00	1.381e+00
67	1.420e+00	1.420e+00	1.452e+00	1.407e+00	1.387e+00	1.412e+00	1.412e+00	1.402e+00	1.405e+00
68	1.447e+00	1.444e+00	1.477e+00	1.432e+00	1.413e+00	1.438e+00	1.436e+00	1.426e+00	1.428e+00
69	1.471e+00	1.467e+00	1.499e+00	1.456e+00	1.437e+00	1.462e+00	1.459e+00	1.449e+00	1.450e+00
70	1.495e+00	1.489e+00	1.521e+00	1.479e+00	1.460e+00	1.487e+00	1.482e+00	1.471e+00	1.471e+00
71	1.518e+00	1.511e+00	1.542e+00	1.501e+00	1.482e+00	1.510e+00	1.503e+00	1.493e+00	1.491e+00
72	1.539e+00	1.531e+00	1.560e+00	1.522e+00	1.502e+00	1.532e+00	1.522e+00	1.512e+00	1.509e+00
73	1.559e+00	1.551e+00	1.579e+00	1.542e+00	1.522e+00	1.553e+00	1.541e+00	1.531e+00	1.528e+00
74	1.578e+00	1.570e+00	1.597e+00	1.560e+00	1.540e+00	1.573e+00	1.560e+00	1.550e+00	1.546e+00
75	1.595e+00	1.588e+00	1.612e+00	1.578e+00	1.557e+00	1.592e+00	1.577e+00	1.567e+00	1.563e+00
76	1.612e+00	1.606e+00	1.629e+00	1.595e+00	1.573e+00	1.610e+00	1.593e+00	1.584e+00	1.580e+00
77	1.629e+00	1.623e+00	1.645e+00	1.612e+00	1.589e+00	1.627e+00	1.610e+00	1.601e+00	1.596e+00
78	1.644e+00	1.639e+00	1.661e+00	1.627e+00	1.603e+00	1.642e+00	1.625e+00	1.616e+00	1.612e+00
79	1.659e+00	1.655e+00	1.677e+00	1.643e+00	1.618e+00	1.658e+00	1.640e+00	1.632e+00	1.628e+00
80	1.673e+00	1.671e+00	1.693e+00	1.659e+00	1.633e+00	1.673e+00	1.655e+00	1.647e+00	1.643e+00
81	1.687e+00	1.685e+00	1.709e+00	1.674e+00	1.647e+00	1.687e+00	1.669e+00	1.661e+00	1.658e+00
82	1.700e+00	1.700e+00	1.725e+00	1.689e+00	1.662e+00	1.701e+00	1.683e+00	1.675e+00	1.673e+00
83	1.714e+00	1.714e+00	1.739e+00	1.703e+00	1.677e+00	1.715e+00	1.697e+00	1.689e+00	1.687e+00
84	1.728e+00	1.727e+00	1.753e+00	1.718e+00	1.692e+00	1.728e+00	1.710e+00	1.702e+00	1.700e+00
85	1.741e+00	1.740e+00	1.766e+00	1.732e+00	1.706e+00	1.741e+00	1.723e+00	1.715e+00	1.714e+00
86	1.754e+00	1.753e+00	1.780e+00	1.746e+00	1.719e+00	1.754e+00	1.736e+00	1.728e+00	1.726e+00
87	1.768e+00	1.766e+00	1.794e+00	1.759e+00	1.733e+00	1.766e+00	1.749e+00	1.741e+00	1.737e+00
88	1.780e+00	1.779e+00	1.807e+00	1.772e+00	1.745e+00	1.777e+00	1.760e+00	1.753e+00	1.748e+00
89	1.791e+00	1.793e+00	1.821e+00	1.784e+00	1.756e+00	1.789e+00	1.772e+00	1.764e+00	1.759e+00
90	1.801e+00	1.807e+00	1.834e+00	1.795e+00	1.765e+00	1.800e+00	1.782e+00	1.774e+00	1.769e+00
91	1.810e+00	1.819e+00	1.845e+00	1.805e+00	1.775e+00	1.811e+00	1.792e+00	1.783e+00	1.778e+00
92	1.818e+00	1.831e+00	1.854e+00	1.814e+00	1.783e+00	1.820e+00	1.799e+00	1.790e+00	1.786e+00
93	1.824e+00	1.841e+00	1.861e+00	1.821e+00	1.791e+00	1.828e+00	1.805e+00	1.796e+00	1.793e+00
94	1.830e+00	1.851e+00	1.867e+00	1.828e+00	1.799e+00	1.835e+00	1.810e+00	1.800e+00	1.799e+00
95	1.835e+00	1.860e+00	1.870e+00	1.834e+00	1.806e+00	1.842e+00	1.814e+00	1.803e+00	1.804e+00
96	1.839e+00	1.867e+00	1.872e+00	1.839e+00	1.812e+00	1.848e+00	1.816e+00	1.805e+00	1.808e+00
97	1.841e+00	1.874e+00	1.873e+00	1.842e+00	1.817e+00	1.852e+00	1.817e+00	1.805e+00	1.810e+00
98	1.842e+00	1.879e+00	1.871e+00	1.845e+00	1.822e+00	1.856e+00	1.817e+00	1.803e+00	1.812e+00
99	1.842e+00	1.884e+00	1.867e+00	1.846e+00	1.827e+00	1.858e+00	1.815e+00	1.800e+00	1.812e+00
100	1.842e+00	1.887e+00	1.862e+00	1.847e+00	1.831e+00	1.860e+00	1.812e+00	1.796e+00	1.812e+00
