# Supplementary material for: Evaluating the Potential of Younger Cases and Older Controls Cohorts to Improve Discovery Power in Genome-Wide Association Studies of Late-Onset Diseases
Source: MDPI journal article supplement (doi:10.3390/jpm9030038), 2019-07-22
Supplement: s2 [file s2 › SuppFiles/Results/LODsCommonLow/ProstateCancer/CasesMultipleYoungOldCohortStatisticalPower.csv]

age	X1	X2	X3	X4	X5	X6	X7	X8	X9
53	1.000e+00	1.000e+00	1.000e+00	1.000e+00	1.000e+00	1.000e+00	1.000e+00	1.000e+00	1.000e+00
54	9.985e-01	9.986e-01	9.984e-01	9.986e-01	9.984e-01	9.987e-01	9.986e-01	9.987e-01	9.985e-01
55	9.965e-01	9.967e-01	9.964e-01	9.967e-01	9.964e-01	9.968e-01	9.967e-01	9.969e-01	9.966e-01
56	9.940e-01	9.943e-01	9.938e-01	9.942e-01	9.938e-01	9.945e-01	9.943e-01	9.946e-01	9.941e-01
57	9.910e-01	9.913e-01	9.908e-01	9.913e-01	9.908e-01	9.917e-01	9.914e-01	9.918e-01	9.912e-01
58	9.875e-01	9.879e-01	9.873e-01	9.878e-01	9.872e-01	9.884e-01	9.879e-01	9.885e-01	9.877e-01
59	9.836e-01	9.841e-01	9.833e-01	9.840e-01	9.832e-01	9.846e-01	9.841e-01	9.846e-01	9.838e-01
60	9.791e-01	9.797e-01	9.790e-01	9.796e-01	9.788e-01	9.803e-01	9.798e-01	9.804e-01	9.795e-01
61	9.742e-01	9.749e-01	9.742e-01	9.747e-01	9.740e-01	9.756e-01	9.751e-01	9.757e-01	9.748e-01
62	9.689e-01	9.696e-01	9.689e-01	9.694e-01	9.686e-01	9.704e-01	9.698e-01	9.704e-01	9.695e-01
63	9.631e-01	9.638e-01	9.633e-01	9.636e-01	9.628e-01	9.647e-01	9.642e-01	9.647e-01	9.638e-01
64	9.569e-01	9.577e-01	9.572e-01	9.575e-01	9.567e-01	9.588e-01	9.581e-01	9.586e-01	9.577e-01
65	9.502e-01	9.511e-01	9.507e-01	9.509e-01	9.499e-01	9.521e-01	9.516e-01	9.519e-01	9.512e-01
66	9.431e-01	9.439e-01	9.437e-01	9.437e-01	9.428e-01	9.451e-01	9.445e-01	9.449e-01	9.441e-01
67	9.357e-01	9.366e-01	9.366e-01	9.365e-01	9.355e-01	9.378e-01	9.373e-01	9.376e-01	9.369e-01
68	9.282e-01	9.290e-01	9.290e-01	9.290e-01	9.279e-01	9.305e-01	9.299e-01	9.300e-01	9.295e-01
69	9.201e-01	9.211e-01	9.212e-01	9.212e-01	9.201e-01	9.227e-01	9.221e-01	9.221e-01	9.217e-01
70	9.123e-01	9.132e-01	9.133e-01	9.133e-01	9.122e-01	9.150e-01	9.142e-01	9.142e-01	9.140e-01
71	9.043e-01	9.053e-01	9.054e-01	9.055e-01	9.043e-01	9.071e-01	9.064e-01	9.064e-01	9.062e-01
72	8.961e-01	8.971e-01	8.971e-01	8.973e-01	8.962e-01	8.991e-01	8.983e-01	8.982e-01	8.982e-01
73	8.880e-01	8.891e-01	8.891e-01	8.893e-01	8.882e-01	8.913e-01	8.904e-01	8.902e-01	8.903e-01
74	8.801e-01	8.813e-01	8.813e-01	8.814e-01	8.803e-01	8.834e-01	8.825e-01	8.824e-01	8.825e-01
75	8.720e-01	8.732e-01	8.734e-01	8.735e-01	8.723e-01	8.754e-01	8.746e-01	8.745e-01	8.746e-01
76	8.643e-01	8.655e-01	8.656e-01	8.658e-01	8.645e-01	8.677e-01	8.669e-01	8.667e-01	8.669e-01
77	8.566e-01	8.579e-01	8.581e-01	8.582e-01	8.568e-01	8.601e-01	8.593e-01	8.593e-01	8.592e-01
78	8.488e-01	8.502e-01	8.508e-01	8.506e-01	8.491e-01	8.524e-01	8.518e-01	8.518e-01	8.516e-01
79	8.415e-01	8.429e-01	8.436e-01	8.433e-01	8.417e-01	8.449e-01	8.445e-01	8.445e-01	8.442e-01
80	8.342e-01	8.357e-01	8.366e-01	8.362e-01	8.344e-01	8.376e-01	8.374e-01	8.374e-01	8.369e-01
81	8.271e-01	8.287e-01	8.296e-01	8.291e-01	8.272e-01	8.304e-01	8.304e-01	8.305e-01	8.299e-01
82	8.201e-01	8.218e-01	8.229e-01	8.223e-01	8.204e-01	8.234e-01	8.236e-01	8.236e-01	8.229e-01
83	8.134e-01	8.152e-01	8.162e-01	8.156e-01	8.137e-01	8.168e-01	8.170e-01	8.169e-01	8.162e-01
84	8.068e-01	8.087e-01	8.097e-01	8.092e-01	8.072e-01	8.102e-01	8.105e-01	8.104e-01	8.096e-01
85	8.005e-01	8.024e-01	8.032e-01	8.028e-01	8.008e-01	8.039e-01	8.043e-01	8.040e-01	8.032e-01
86	7.944e-01	7.964e-01	7.969e-01	7.967e-01	7.947e-01	7.979e-01	7.982e-01	7.979e-01	7.970e-01
87	7.884e-01	7.905e-01	7.908e-01	7.908e-01	7.888e-01	7.921e-01	7.922e-01	7.919e-01	7.909e-01
88	7.826e-01	7.848e-01	7.848e-01	7.850e-01	7.831e-01	7.865e-01	7.864e-01	7.860e-01	7.850e-01
89	7.770e-01	7.793e-01	7.789e-01	7.792e-01	7.774e-01	7.811e-01	7.807e-01	7.805e-01	7.792e-01
90	7.716e-01	7.740e-01	7.732e-01	7.737e-01	7.719e-01	7.760e-01	7.751e-01	7.751e-01	7.737e-01
91	7.662e-01	7.687e-01	7.675e-01	7.682e-01	7.666e-01	7.708e-01	7.696e-01	7.698e-01	7.682e-01
92	7.610e-01	7.636e-01	7.621e-01	7.628e-01	7.615e-01	7.656e-01	7.643e-01	7.645e-01	7.628e-01
93	7.559e-01	7.586e-01	7.566e-01	7.576e-01	7.565e-01	7.604e-01	7.589e-01	7.595e-01	7.576e-01
94	7.509e-01	7.538e-01	7.513e-01	7.524e-01	7.517e-01	7.553e-01	7.537e-01	7.544e-01	7.524e-01
95	7.460e-01	7.491e-01	7.461e-01	7.474e-01	7.471e-01	7.502e-01	7.486e-01	7.495e-01	7.473e-01
96	7.412e-01	7.445e-01	7.411e-01	7.424e-01	7.426e-01	7.452e-01	7.436e-01	7.448e-01	7.423e-01
97	7.366e-01	7.401e-01	7.360e-01	7.377e-01	7.383e-01	7.403e-01	7.386e-01	7.401e-01	7.374e-01
98	7.321e-01	7.357e-01	7.311e-01	7.329e-01	7.341e-01	7.354e-01	7.337e-01	7.354e-01	7.326e-01
99	7.276e-01	7.314e-01	7.262e-01	7.283e-01	7.301e-01	7.304e-01	7.290e-01	7.309e-01	7.279e-01
100	7.233e-01	7.273e-01	7.215e-01	7.238e-01	7.263e-01	7.256e-01	7.242e-01	7.265e-01	7.233e-01
