# Supplementary material for: Evaluating the Potential of Younger Cases and Older Controls Cohorts to Improve Discovery Power in Genome-Wide Association Studies of Late-Onset Diseases
Source: MDPI journal article supplement (doi:10.3390/jpm9030038), 2019-07-22
Supplement: s2 [file s2 › SuppFiles/Results/LODsCommonLow/ProstateCancer/CasesNeededCohortStatisticalPower.csv]

age	X1	X2	X3	X4	X5	X6	X7	X8	X9
53	6.272e+04	1.431e+05	5.746e+05	2.012e+04	4.704e+04	1.902e+05	1.505e+04	3.629e+04	1.525e+05
54	6.458e+04	1.475e+05	5.927e+05	2.071e+04	4.826e+04	1.957e+05	1.549e+04	3.732e+04	1.572e+05
55	6.646e+04	1.519e+05	6.110e+05	2.130e+04	4.951e+04	2.013e+05	1.593e+04	3.836e+04	1.618e+05
56	6.836e+04	1.564e+05	6.296e+05	2.190e+04	5.078e+04	2.070e+05	1.638e+04	3.941e+04	1.666e+05
57	7.027e+04	1.609e+05	6.484e+05	2.250e+04	5.206e+04	2.127e+05	1.684e+04	4.047e+04	1.713e+05
58	7.220e+04	1.654e+05	6.674e+05	2.310e+04	5.335e+04	2.184e+05	1.729e+04	4.154e+04	1.760e+05
59	7.413e+04	1.699e+05	6.865e+05	2.371e+04	5.467e+04	2.242e+05	1.775e+04	4.262e+04	1.806e+05
60	7.606e+04	1.743e+05	7.058e+05	2.431e+04	5.598e+04	2.300e+05	1.821e+04	4.369e+04	1.852e+05
61	7.798e+04	1.787e+05	7.249e+05	2.491e+04	5.731e+04	2.357e+05	1.866e+04	4.475e+04	1.897e+05
62	7.990e+04	1.831e+05	7.445e+05	2.551e+04	5.865e+04	2.415e+05	1.911e+04	4.583e+04	1.942e+05
63	8.181e+04	1.875e+05	7.643e+05	2.610e+04	6.002e+04	2.473e+05	1.957e+04	4.691e+04	1.985e+05
64	8.368e+04	1.917e+05	7.834e+05	2.669e+04	6.136e+04	2.530e+05	2.001e+04	4.796e+04	2.027e+05
65	8.553e+04	1.957e+05	8.013e+05	2.725e+04	6.268e+04	2.583e+05	2.044e+04	4.897e+04	2.068e+05
66	8.733e+04	1.995e+05	8.181e+05	2.779e+04	6.399e+04	2.634e+05	2.085e+04	4.993e+04	2.105e+05
67	8.908e+04	2.032e+05	8.341e+05	2.831e+04	6.526e+04	2.685e+05	2.124e+04	5.088e+04	2.143e+05
68	9.073e+04	2.067e+05	8.487e+05	2.882e+04	6.645e+04	2.734e+05	2.161e+04	5.176e+04	2.178e+05
69	9.229e+04	2.099e+05	8.615e+05	2.929e+04	6.759e+04	2.781e+05	2.196e+04	5.259e+04	2.210e+05
70	9.380e+04	2.131e+05	8.742e+05	2.976e+04	6.869e+04	2.827e+05	2.229e+04	5.339e+04	2.242e+05
71	9.521e+04	2.162e+05	8.861e+05	3.020e+04	6.971e+04	2.871e+05	2.261e+04	5.416e+04	2.273e+05
72	9.652e+04	2.190e+05	8.966e+05	3.061e+04	7.067e+04	2.913e+05	2.290e+04	5.486e+04	2.301e+05
73	9.778e+04	2.219e+05	9.072e+05	3.101e+04	7.159e+04	2.953e+05	2.319e+04	5.555e+04	2.330e+05
74	9.897e+04	2.247e+05	9.175e+05	3.139e+04	7.245e+04	2.992e+05	2.347e+04	5.623e+04	2.357e+05
75	1.000e+05	2.273e+05	9.265e+05	3.174e+04	7.323e+04	3.027e+05	2.372e+04	5.686e+04	2.383e+05
76	1.011e+05	2.298e+05	9.359e+05	3.209e+04	7.400e+04	3.062e+05	2.397e+04	5.748e+04	2.408e+05
77	1.022e+05	2.323e+05	9.454e+05	3.243e+04	7.474e+04	3.094e+05	2.422e+04	5.808e+04	2.434e+05
78	1.031e+05	2.346e+05	9.547e+05	3.274e+04	7.541e+04	3.123e+05	2.445e+04	5.865e+04	2.458e+05
79	1.040e+05	2.369e+05	9.639e+05	3.305e+04	7.610e+04	3.153e+05	2.468e+04	5.921e+04	2.482e+05
80	1.049e+05	2.391e+05	9.731e+05	3.337e+04	7.681e+04	3.181e+05	2.490e+04	5.976e+04	2.505e+05
81	1.058e+05	2.411e+05	9.823e+05	3.367e+04	7.749e+04	3.208e+05	2.511e+04	6.028e+04	2.528e+05
82	1.067e+05	2.432e+05	9.912e+05	3.397e+04	7.817e+04	3.235e+05	2.532e+04	6.079e+04	2.550e+05
83	1.075e+05	2.452e+05	9.994e+05	3.427e+04	7.887e+04	3.261e+05	2.553e+04	6.129e+04	2.572e+05
84	1.084e+05	2.471e+05	1.007e+06	3.456e+04	7.957e+04	3.287e+05	2.573e+04	6.177e+04	2.592e+05
85	1.092e+05	2.490e+05	1.015e+06	3.484e+04	8.023e+04	3.312e+05	2.592e+04	6.224e+04	2.613e+05
86	1.100e+05	2.509e+05	1.023e+06	3.512e+04	8.087e+04	3.336e+05	2.612e+04	6.271e+04	2.631e+05
87	1.109e+05	2.527e+05	1.031e+06	3.539e+04	8.150e+04	3.358e+05	2.631e+04	6.317e+04	2.649e+05
88	1.116e+05	2.545e+05	1.038e+06	3.565e+04	8.208e+04	3.380e+05	2.649e+04	6.359e+04	2.666e+05
89	1.123e+05	2.565e+05	1.046e+06	3.589e+04	8.257e+04	3.402e+05	2.666e+04	6.399e+04	2.682e+05
90	1.130e+05	2.585e+05	1.054e+06	3.611e+04	8.303e+04	3.424e+05	2.682e+04	6.438e+04	2.697e+05
91	1.135e+05	2.603e+05	1.060e+06	3.631e+04	8.347e+04	3.444e+05	2.696e+04	6.470e+04	2.711e+05
92	1.140e+05	2.619e+05	1.065e+06	3.649e+04	8.388e+04	3.461e+05	2.707e+04	6.496e+04	2.723e+05
93	1.144e+05	2.635e+05	1.069e+06	3.664e+04	8.425e+04	3.477e+05	2.716e+04	6.517e+04	2.734e+05
94	1.148e+05	2.649e+05	1.073e+06	3.678e+04	8.460e+04	3.491e+05	2.724e+04	6.533e+04	2.743e+05
95	1.151e+05	2.661e+05	1.075e+06	3.690e+04	8.492e+04	3.503e+05	2.729e+04	6.543e+04	2.750e+05
96	1.153e+05	2.672e+05	1.076e+06	3.699e+04	8.522e+04	3.514e+05	2.733e+04	6.549e+04	2.756e+05
97	1.155e+05	2.681e+05	1.076e+06	3.706e+04	8.549e+04	3.522e+05	2.734e+04	6.549e+04	2.760e+05
98	1.156e+05	2.689e+05	1.075e+06	3.711e+04	8.572e+04	3.529e+05	2.734e+04	6.542e+04	2.763e+05
99	1.156e+05	2.695e+05	1.073e+06	3.714e+04	8.594e+04	3.534e+05	2.731e+04	6.531e+04	2.763e+05
100	1.155e+05	2.700e+05	1.070e+06	3.715e+04	8.612e+04	3.537e+05	2.726e+04	6.515e+04	2.762e+05
