# Supplementary material for: Evaluating the Potential of Younger Cases and Older Controls Cohorts to Improve Discovery Power in Genome-Wide Association Studies of Late-Onset Diseases
Source: MDPI journal article supplement (doi:10.3390/jpm9030038), 2019-07-22
Supplement: s2 [file s2 › SuppFiles/Results/LODsCommonLow/ProstateCancer/CasesNeededYoungOldCohortStatisticalPower.csv]

age	X1	X2	X3	X4	X5	X6	X7	X8	X9
53	6.272e+04	1.431e+05	5.746e+05	2.012e+04	4.704e+04	1.902e+05	1.505e+04	3.629e+04	1.525e+05
54	6.263e+04	1.429e+05	5.737e+05	2.009e+04	4.696e+04	1.899e+05	1.503e+04	3.624e+04	1.522e+05
55	6.250e+04	1.426e+05	5.725e+05	2.005e+04	4.687e+04	1.896e+05	1.500e+04	3.617e+04	1.519e+05
56	6.235e+04	1.423e+05	5.711e+05	2.000e+04	4.674e+04	1.891e+05	1.496e+04	3.609e+04	1.516e+05
57	6.216e+04	1.419e+05	5.693e+05	1.994e+04	4.660e+04	1.886e+05	1.492e+04	3.599e+04	1.511e+05
58	6.194e+04	1.414e+05	5.674e+05	1.987e+04	4.644e+04	1.880e+05	1.487e+04	3.587e+04	1.506e+05
59	6.169e+04	1.408e+05	5.651e+05	1.979e+04	4.625e+04	1.873e+05	1.481e+04	3.573e+04	1.500e+05
60	6.141e+04	1.402e+05	5.626e+05	1.971e+04	4.604e+04	1.864e+05	1.474e+04	3.557e+04	1.493e+05
61	6.111e+04	1.395e+05	5.598e+05	1.961e+04	4.581e+04	1.855e+05	1.467e+04	3.540e+04	1.486e+05
62	6.077e+04	1.387e+05	5.568e+05	1.950e+04	4.556e+04	1.845e+05	1.459e+04	3.521e+04	1.478e+05
63	6.041e+04	1.379e+05	5.535e+05	1.939e+04	4.529e+04	1.835e+05	1.451e+04	3.501e+04	1.469e+05
64	6.002e+04	1.370e+05	5.500e+05	1.926e+04	4.500e+04	1.823e+05	1.442e+04	3.478e+04	1.460e+05
65	5.960e+04	1.361e+05	5.463e+05	1.913e+04	4.468e+04	1.811e+05	1.432e+04	3.454e+04	1.450e+05
66	5.915e+04	1.351e+05	5.423e+05	1.899e+04	4.435e+04	1.797e+05	1.421e+04	3.428e+04	1.439e+05
67	5.869e+04	1.340e+05	5.382e+05	1.884e+04	4.400e+04	1.784e+05	1.410e+04	3.402e+04	1.429e+05
68	5.822e+04	1.329e+05	5.339e+05	1.869e+04	4.365e+04	1.770e+05	1.399e+04	3.375e+04	1.417e+05
69	5.771e+04	1.318e+05	5.293e+05	1.853e+04	4.328e+04	1.755e+05	1.387e+04	3.346e+04	1.405e+05
70	5.722e+04	1.307e+05	5.248e+05	1.837e+04	4.291e+04	1.740e+05	1.376e+04	3.317e+04	1.394e+05
71	5.672e+04	1.295e+05	5.203e+05	1.822e+04	4.253e+04	1.725e+05	1.364e+04	3.289e+04	1.382e+05
72	5.621e+04	1.284e+05	5.155e+05	1.805e+04	4.216e+04	1.710e+05	1.352e+04	3.259e+04	1.369e+05
73	5.570e+04	1.272e+05	5.109e+05	1.789e+04	4.178e+04	1.695e+05	1.340e+04	3.230e+04	1.357e+05
74	5.520e+04	1.261e+05	5.064e+05	1.773e+04	4.141e+04	1.680e+05	1.328e+04	3.202e+04	1.345e+05
75	5.469e+04	1.250e+05	5.019e+05	1.757e+04	4.103e+04	1.665e+05	1.316e+04	3.173e+04	1.333e+05
76	5.421e+04	1.239e+05	4.974e+05	1.742e+04	4.066e+04	1.650e+05	1.304e+04	3.145e+04	1.322e+05
77	5.372e+04	1.228e+05	4.931e+05	1.726e+04	4.030e+04	1.636e+05	1.293e+04	3.118e+04	1.310e+05
78	5.324e+04	1.217e+05	4.889e+05	1.711e+04	3.994e+04	1.621e+05	1.282e+04	3.091e+04	1.298e+05
79	5.278e+04	1.206e+05	4.847e+05	1.696e+04	3.959e+04	1.607e+05	1.271e+04	3.064e+04	1.287e+05
80	5.232e+04	1.196e+05	4.807e+05	1.682e+04	3.925e+04	1.593e+05	1.260e+04	3.039e+04	1.276e+05
81	5.187e+04	1.186e+05	4.767e+05	1.668e+04	3.891e+04	1.579e+05	1.249e+04	3.013e+04	1.265e+05
82	5.144e+04	1.176e+05	4.729e+05	1.654e+04	3.859e+04	1.566e+05	1.239e+04	2.989e+04	1.255e+05
83	5.102e+04	1.166e+05	4.690e+05	1.641e+04	3.827e+04	1.553e+05	1.229e+04	2.964e+04	1.244e+05
84	5.061e+04	1.157e+05	4.653e+05	1.628e+04	3.797e+04	1.541e+05	1.220e+04	2.941e+04	1.234e+05
85	5.021e+04	1.148e+05	4.616e+05	1.615e+04	3.767e+04	1.529e+05	1.210e+04	2.917e+04	1.225e+05
86	4.982e+04	1.140e+05	4.580e+05	1.603e+04	3.738e+04	1.517e+05	1.201e+04	2.895e+04	1.215e+05
87	4.945e+04	1.131e+05	4.544e+05	1.591e+04	3.710e+04	1.506e+05	1.192e+04	2.873e+04	1.206e+05
88	4.909e+04	1.123e+05	4.510e+05	1.579e+04	3.683e+04	1.496e+05	1.183e+04	2.852e+04	1.197e+05
89	4.874e+04	1.115e+05	4.476e+05	1.568e+04	3.657e+04	1.485e+05	1.175e+04	2.832e+04	1.188e+05
90	4.839e+04	1.107e+05	4.443e+05	1.556e+04	3.631e+04	1.476e+05	1.166e+04	2.813e+04	1.180e+05
91	4.806e+04	1.100e+05	4.411e+05	1.545e+04	3.606e+04	1.466e+05	1.158e+04	2.793e+04	1.171e+05
92	4.773e+04	1.093e+05	4.379e+05	1.535e+04	3.582e+04	1.456e+05	1.150e+04	2.774e+04	1.163e+05
93	4.741e+04	1.086e+05	4.348e+05	1.524e+04	3.558e+04	1.446e+05	1.142e+04	2.756e+04	1.155e+05
94	4.710e+04	1.079e+05	4.318e+05	1.514e+04	3.536e+04	1.436e+05	1.134e+04	2.737e+04	1.147e+05
95	4.679e+04	1.072e+05	4.288e+05	1.503e+04	3.514e+04	1.427e+05	1.126e+04	2.720e+04	1.139e+05
96	4.649e+04	1.065e+05	4.258e+05	1.494e+04	3.493e+04	1.417e+05	1.119e+04	2.703e+04	1.132e+05
97	4.620e+04	1.059e+05	4.230e+05	1.484e+04	3.473e+04	1.408e+05	1.111e+04	2.685e+04	1.124e+05
98	4.592e+04	1.053e+05	4.201e+05	1.474e+04	3.453e+04	1.399e+05	1.104e+04	2.669e+04	1.117e+05
99	4.563e+04	1.047e+05	4.173e+05	1.465e+04	3.434e+04	1.389e+05	1.097e+04	2.652e+04	1.110e+05
100	4.536e+04	1.041e+05	4.146e+05	1.456e+04	3.416e+04	1.380e+05	1.090e+04	2.636e+04	1.103e+05
