# Supplementary material for: Evaluating the Potential of Younger Cases and Older Controls Cohorts to Improve Discovery Power in Genome-Wide Association Studies of Late-Onset Diseases
Source: MDPI journal article supplement (doi:10.3390/jpm9030038), 2019-07-22
Supplement: s2 [file s2 › SuppFiles/Results/LODsCommonLow/Stroke/CasesMultipleSameAgeCohortStatisticalPower.csv]

age	X1	X2	X3	X4	X5	X6	X7	X8	X9
47	1.000e+00	1.000e+00	1.000e+00	1.000e+00	1.000e+00	1.000e+00	1.000e+00	1.000e+00	1.000e+00
48	1.010e+00	1.007e+00	1.009e+00	1.008e+00	1.010e+00	1.009e+00	1.008e+00	1.009e+00	1.005e+00
49	1.020e+00	1.014e+00	1.019e+00	1.017e+00	1.021e+00	1.018e+00	1.016e+00	1.018e+00	1.010e+00
50	1.031e+00	1.022e+00	1.028e+00	1.027e+00	1.032e+00	1.028e+00	1.025e+00	1.028e+00	1.016e+00
51	1.043e+00	1.031e+00	1.038e+00	1.037e+00	1.043e+00	1.038e+00	1.035e+00	1.039e+00	1.024e+00
52	1.055e+00	1.041e+00	1.049e+00	1.047e+00	1.055e+00	1.049e+00	1.045e+00	1.050e+00	1.032e+00
53	1.067e+00	1.051e+00	1.060e+00	1.059e+00	1.067e+00	1.061e+00	1.056e+00	1.061e+00	1.040e+00
54	1.080e+00	1.063e+00	1.071e+00	1.071e+00	1.080e+00	1.073e+00	1.067e+00	1.073e+00	1.050e+00
55	1.094e+00	1.075e+00	1.082e+00	1.083e+00	1.094e+00	1.087e+00	1.079e+00	1.086e+00	1.061e+00
56	1.109e+00	1.088e+00	1.094e+00	1.097e+00	1.108e+00	1.100e+00	1.091e+00	1.099e+00	1.073e+00
57	1.124e+00	1.102e+00	1.107e+00	1.111e+00	1.122e+00	1.115e+00	1.105e+00	1.113e+00	1.085e+00
58	1.139e+00	1.117e+00	1.120e+00	1.126e+00	1.137e+00	1.130e+00	1.119e+00	1.128e+00	1.099e+00
59	1.156e+00	1.133e+00	1.133e+00	1.142e+00	1.153e+00	1.146e+00	1.134e+00	1.143e+00	1.115e+00
60	1.173e+00	1.150e+00	1.148e+00	1.158e+00	1.169e+00	1.163e+00	1.149e+00	1.159e+00	1.131e+00
61	1.191e+00	1.168e+00	1.163e+00	1.176e+00	1.186e+00	1.182e+00	1.166e+00	1.176e+00	1.148e+00
62	1.211e+00	1.187e+00	1.180e+00	1.194e+00	1.205e+00	1.201e+00	1.184e+00	1.195e+00	1.167e+00
63	1.231e+00	1.206e+00	1.198e+00	1.214e+00	1.224e+00	1.222e+00	1.202e+00	1.213e+00	1.186e+00
64	1.251e+00	1.225e+00	1.216e+00	1.233e+00	1.244e+00	1.242e+00	1.220e+00	1.232e+00	1.205e+00
65	1.271e+00	1.246e+00	1.236e+00	1.253e+00	1.263e+00	1.263e+00	1.240e+00	1.251e+00	1.225e+00
66	1.293e+00	1.267e+00	1.257e+00	1.274e+00	1.284e+00	1.285e+00	1.260e+00	1.272e+00	1.245e+00
67	1.315e+00	1.288e+00	1.277e+00	1.295e+00	1.304e+00	1.307e+00	1.280e+00	1.292e+00	1.265e+00
68	1.337e+00	1.309e+00	1.298e+00	1.316e+00	1.325e+00	1.329e+00	1.301e+00	1.313e+00	1.284e+00
69	1.360e+00	1.331e+00	1.319e+00	1.338e+00	1.346e+00	1.351e+00	1.322e+00	1.334e+00	1.305e+00
70	1.382e+00	1.352e+00	1.340e+00	1.359e+00	1.367e+00	1.373e+00	1.342e+00	1.355e+00	1.324e+00
71	1.404e+00	1.373e+00	1.361e+00	1.380e+00	1.387e+00	1.394e+00	1.363e+00	1.375e+00	1.344e+00
72	1.427e+00	1.395e+00	1.381e+00	1.402e+00	1.408e+00	1.415e+00	1.384e+00	1.396e+00	1.363e+00
73	1.448e+00	1.415e+00	1.401e+00	1.422e+00	1.428e+00	1.434e+00	1.403e+00	1.416e+00	1.382e+00
74	1.469e+00	1.435e+00	1.420e+00	1.442e+00	1.447e+00	1.454e+00	1.422e+00	1.435e+00	1.400e+00
75	1.490e+00	1.455e+00	1.439e+00	1.461e+00	1.466e+00	1.472e+00	1.441e+00	1.454e+00	1.418e+00
76	1.509e+00	1.474e+00	1.458e+00	1.480e+00	1.485e+00	1.490e+00	1.459e+00	1.472e+00	1.435e+00
77	1.528e+00	1.492e+00	1.475e+00	1.497e+00	1.502e+00	1.506e+00	1.476e+00	1.488e+00	1.451e+00
78	1.546e+00	1.509e+00	1.492e+00	1.514e+00	1.518e+00	1.522e+00	1.492e+00	1.504e+00	1.466e+00
79	1.562e+00	1.525e+00	1.508e+00	1.529e+00	1.534e+00	1.537e+00	1.507e+00	1.518e+00	1.479e+00
80	1.578e+00	1.540e+00	1.523e+00	1.543e+00	1.547e+00	1.550e+00	1.521e+00	1.531e+00	1.492e+00
81	1.592e+00	1.553e+00	1.536e+00	1.556e+00	1.560e+00	1.562e+00	1.533e+00	1.543e+00	1.503e+00
82	1.605e+00	1.565e+00	1.548e+00	1.568e+00	1.571e+00	1.574e+00	1.544e+00	1.553e+00	1.513e+00
83	1.617e+00	1.576e+00	1.558e+00	1.578e+00	1.580e+00	1.584e+00	1.554e+00	1.562e+00	1.521e+00
84	1.627e+00	1.586e+00	1.567e+00	1.587e+00	1.589e+00	1.592e+00	1.563e+00	1.570e+00	1.529e+00
85	1.636e+00	1.593e+00	1.573e+00	1.594e+00	1.596e+00	1.600e+00	1.569e+00	1.576e+00	1.535e+00
86	1.643e+00	1.600e+00	1.578e+00	1.600e+00	1.601e+00	1.606e+00	1.575e+00	1.582e+00	1.541e+00
87	1.649e+00	1.604e+00	1.581e+00	1.604e+00	1.605e+00	1.609e+00	1.578e+00	1.585e+00	1.544e+00
88	1.653e+00	1.606e+00	1.583e+00	1.606e+00	1.607e+00	1.611e+00	1.580e+00	1.587e+00	1.547e+00
89	1.655e+00	1.607e+00	1.583e+00	1.607e+00	1.607e+00	1.612e+00	1.580e+00	1.587e+00	1.547e+00
90	1.654e+00	1.606e+00	1.582e+00	1.605e+00	1.606e+00	1.610e+00	1.578e+00	1.585e+00	1.547e+00
91	1.651e+00	1.603e+00	1.578e+00	1.601e+00	1.601e+00	1.605e+00	1.573e+00	1.581e+00	1.543e+00
92	1.645e+00	1.597e+00	1.572e+00	1.594e+00	1.594e+00	1.597e+00	1.566e+00	1.574e+00	1.537e+00
93	1.636e+00	1.589e+00	1.565e+00	1.586e+00	1.586e+00	1.588e+00	1.557e+00	1.565e+00	1.530e+00
94	1.625e+00	1.580e+00	1.555e+00	1.575e+00	1.575e+00	1.576e+00	1.545e+00	1.555e+00	1.520e+00
95	1.611e+00	1.569e+00	1.544e+00	1.562e+00	1.563e+00	1.562e+00	1.532e+00	1.542e+00	1.509e+00
96	1.595e+00	1.555e+00	1.531e+00	1.547e+00	1.548e+00	1.545e+00	1.517e+00	1.527e+00	1.495e+00
97	1.577e+00	1.540e+00	1.516e+00	1.531e+00	1.532e+00	1.527e+00	1.500e+00	1.510e+00	1.480e+00
98	1.557e+00	1.524e+00	1.500e+00	1.513e+00	1.514e+00	1.507e+00	1.481e+00	1.492e+00	1.464e+00
99	1.535e+00	1.505e+00	1.482e+00	1.492e+00	1.494e+00	1.485e+00	1.461e+00	1.472e+00	1.445e+00
100	1.511e+00	1.485e+00	1.463e+00	1.471e+00	1.473e+00	1.461e+00	1.439e+00	1.451e+00	1.425e+00
