# Supplementary material for: Evaluating the Potential of Younger Cases and Older Controls Cohorts to Improve Discovery Power in Genome-Wide Association Studies of Late-Onset Diseases
Source: MDPI journal article supplement (doi:10.3390/jpm9030038), 2019-07-22
Supplement: s2 [file s2 › SuppFiles/Results/LODsCommonLow/Stroke/CasesMultipleYoungOldCohortStatisticalPower.csv]

age	X1	X2	X3	X4	X5	X6	X7	X8	X9
47	1.000e+00	1.000e+00	1.000e+00	1.000e+00	1.000e+00	1.000e+00	1.000e+00	1.000e+00	1.000e+00
48	9.997e-01	9.998e-01	9.998e-01	9.998e-01	9.998e-01	9.998e-01	9.999e-01	9.998e-01	9.997e-01
49	9.989e-01	9.991e-01	9.990e-01	9.990e-01	9.991e-01	9.990e-01	9.992e-01	9.990e-01	9.988e-01
50	9.976e-01	9.979e-01	9.977e-01	9.977e-01	9.978e-01	9.978e-01	9.981e-01	9.978e-01	9.975e-01
51	9.958e-01	9.961e-01	9.959e-01	9.960e-01	9.961e-01	9.961e-01	9.964e-01	9.960e-01	9.957e-01
52	9.935e-01	9.938e-01	9.937e-01	9.937e-01	9.939e-01	9.939e-01	9.942e-01	9.938e-01	9.934e-01
53	9.907e-01	9.910e-01	9.908e-01	9.909e-01	9.912e-01	9.911e-01	9.914e-01	9.910e-01	9.905e-01
54	9.874e-01	9.877e-01	9.875e-01	9.876e-01	9.879e-01	9.879e-01	9.882e-01	9.878e-01	9.872e-01
55	9.837e-01	9.839e-01	9.837e-01	9.839e-01	9.842e-01	9.842e-01	9.845e-01	9.841e-01	9.835e-01
56	9.794e-01	9.797e-01	9.794e-01	9.796e-01	9.800e-01	9.801e-01	9.803e-01	9.799e-01	9.792e-01
57	9.745e-01	9.749e-01	9.746e-01	9.748e-01	9.752e-01	9.754e-01	9.756e-01	9.752e-01	9.743e-01
58	9.694e-01	9.696e-01	9.694e-01	9.697e-01	9.701e-01	9.703e-01	9.705e-01	9.701e-01	9.692e-01
59	9.639e-01	9.642e-01	9.640e-01	9.643e-01	9.647e-01	9.649e-01	9.650e-01	9.647e-01	9.638e-01
60	9.578e-01	9.580e-01	9.578e-01	9.582e-01	9.587e-01	9.588e-01	9.589e-01	9.587e-01	9.577e-01
61	9.511e-01	9.513e-01	9.512e-01	9.516e-01	9.520e-01	9.522e-01	9.523e-01	9.521e-01	9.511e-01
62	9.441e-01	9.442e-01	9.442e-01	9.445e-01	9.451e-01	9.453e-01	9.453e-01	9.452e-01	9.442e-01
63	9.365e-01	9.366e-01	9.366e-01	9.371e-01	9.376e-01	9.378e-01	9.379e-01	9.376e-01	9.366e-01
64	9.281e-01	9.281e-01	9.282e-01	9.286e-01	9.293e-01	9.294e-01	9.294e-01	9.293e-01	9.282e-01
65	9.190e-01	9.189e-01	9.191e-01	9.195e-01	9.203e-01	9.204e-01	9.204e-01	9.203e-01	9.191e-01
66	9.094e-01	9.094e-01	9.095e-01	9.100e-01	9.108e-01	9.110e-01	9.110e-01	9.108e-01	9.096e-01
67	8.991e-01	8.990e-01	8.991e-01	8.998e-01	9.005e-01	9.007e-01	9.007e-01	9.005e-01	8.993e-01
68	8.882e-01	8.880e-01	8.880e-01	8.888e-01	8.896e-01	8.898e-01	8.898e-01	8.896e-01	8.882e-01
69	8.766e-01	8.764e-01	8.763e-01	8.773e-01	8.781e-01	8.785e-01	8.784e-01	8.782e-01	8.767e-01
70	8.646e-01	8.642e-01	8.640e-01	8.652e-01	8.661e-01	8.665e-01	8.663e-01	8.661e-01	8.645e-01
71	8.518e-01	8.513e-01	8.510e-01	8.525e-01	8.533e-01	8.538e-01	8.535e-01	8.533e-01	8.516e-01
72	8.386e-01	8.379e-01	8.376e-01	8.392e-01	8.401e-01	8.406e-01	8.403e-01	8.402e-01	8.383e-01
73	8.248e-01	8.242e-01	8.238e-01	8.255e-01	8.264e-01	8.270e-01	8.267e-01	8.264e-01	8.243e-01
74	8.107e-01	8.099e-01	8.095e-01	8.113e-01	8.122e-01	8.129e-01	8.124e-01	8.122e-01	8.100e-01
75	7.961e-01	7.952e-01	7.946e-01	7.966e-01	7.975e-01	7.982e-01	7.978e-01	7.975e-01	7.952e-01
76	7.812e-01	7.802e-01	7.796e-01	7.817e-01	7.826e-01	7.834e-01	7.828e-01	7.826e-01	7.801e-01
77	7.663e-01	7.652e-01	7.645e-01	7.667e-01	7.676e-01	7.684e-01	7.678e-01	7.675e-01	7.648e-01
78	7.510e-01	7.499e-01	7.491e-01	7.513e-01	7.523e-01	7.531e-01	7.524e-01	7.520e-01	7.493e-01
79	7.355e-01	7.343e-01	7.335e-01	7.357e-01	7.366e-01	7.375e-01	7.369e-01	7.364e-01	7.336e-01
80	7.201e-01	7.188e-01	7.179e-01	7.203e-01	7.211e-01	7.220e-01	7.214e-01	7.209e-01	7.179e-01
81	7.048e-01	7.034e-01	7.025e-01	7.048e-01	7.056e-01	7.066e-01	7.059e-01	7.054e-01	7.023e-01
82	6.893e-01	6.879e-01	6.870e-01	6.893e-01	6.900e-01	6.911e-01	6.903e-01	6.897e-01	6.864e-01
83	6.740e-01	6.725e-01	6.716e-01	6.739e-01	6.745e-01	6.757e-01	6.749e-01	6.742e-01	6.708e-01
84	6.591e-01	6.576e-01	6.565e-01	6.588e-01	6.594e-01	6.606e-01	6.598e-01	6.591e-01	6.556e-01
85	6.444e-01	6.428e-01	6.416e-01	6.440e-01	6.445e-01	6.458e-01	6.449e-01	6.443e-01	6.406e-01
86	6.298e-01	6.282e-01	6.268e-01	6.293e-01	6.297e-01	6.310e-01	6.301e-01	6.295e-01	6.257e-01
87	6.157e-01	6.139e-01	6.125e-01	6.150e-01	6.153e-01	6.166e-01	6.157e-01	6.152e-01	6.113e-01
88	6.020e-01	6.002e-01	5.985e-01	6.012e-01	6.014e-01	6.027e-01	6.018e-01	6.014e-01	5.974e-01
89	5.887e-01	5.867e-01	5.847e-01	5.876e-01	5.877e-01	5.891e-01	5.881e-01	5.878e-01	5.838e-01
90	5.756e-01	5.735e-01	5.713e-01	5.744e-01	5.744e-01	5.757e-01	5.747e-01	5.746e-01	5.705e-01
91	5.628e-01	5.608e-01	5.585e-01	5.616e-01	5.616e-01	5.628e-01	5.617e-01	5.617e-01	5.576e-01
92	5.504e-01	5.484e-01	5.460e-01	5.491e-01	5.491e-01	5.502e-01	5.490e-01	5.492e-01	5.451e-01
93	5.382e-01	5.365e-01	5.339e-01	5.369e-01	5.369e-01	5.378e-01	5.367e-01	5.369e-01	5.329e-01
94	5.264e-01	5.248e-01	5.222e-01	5.250e-01	5.251e-01	5.259e-01	5.246e-01	5.250e-01	5.211e-01
95	5.148e-01	5.135e-01	5.108e-01	5.135e-01	5.136e-01	5.142e-01	5.129e-01	5.134e-01	5.095e-01
96	5.035e-01	5.025e-01	4.997e-01	5.021e-01	5.023e-01	5.028e-01	5.015e-01	5.021e-01	4.983e-01
97	4.925e-01	4.917e-01	4.889e-01	4.912e-01	4.914e-01	4.917e-01	4.902e-01	4.910e-01	4.873e-01
98	4.817e-01	4.813e-01	4.784e-01	4.804e-01	4.808e-01	4.808e-01	4.794e-01	4.802e-01	4.766e-01
99	4.712e-01	4.711e-01	4.683e-01	4.700e-01	4.705e-01	4.702e-01	4.687e-01	4.697e-01	4.662e-01
100	4.610e-01	4.612e-01	4.584e-01	4.598e-01	4.605e-01	4.599e-01	4.584e-01	4.594e-01	4.560e-01
